# Supplementary material for: Flight of the dragonflies and damselflies
Source: PubMed Central journal article supplement (PMC4992713; doi:10.1098/rstb.2015.0389), 2016-09-26

# Aeshna mixta-F1-museum

## Forewing

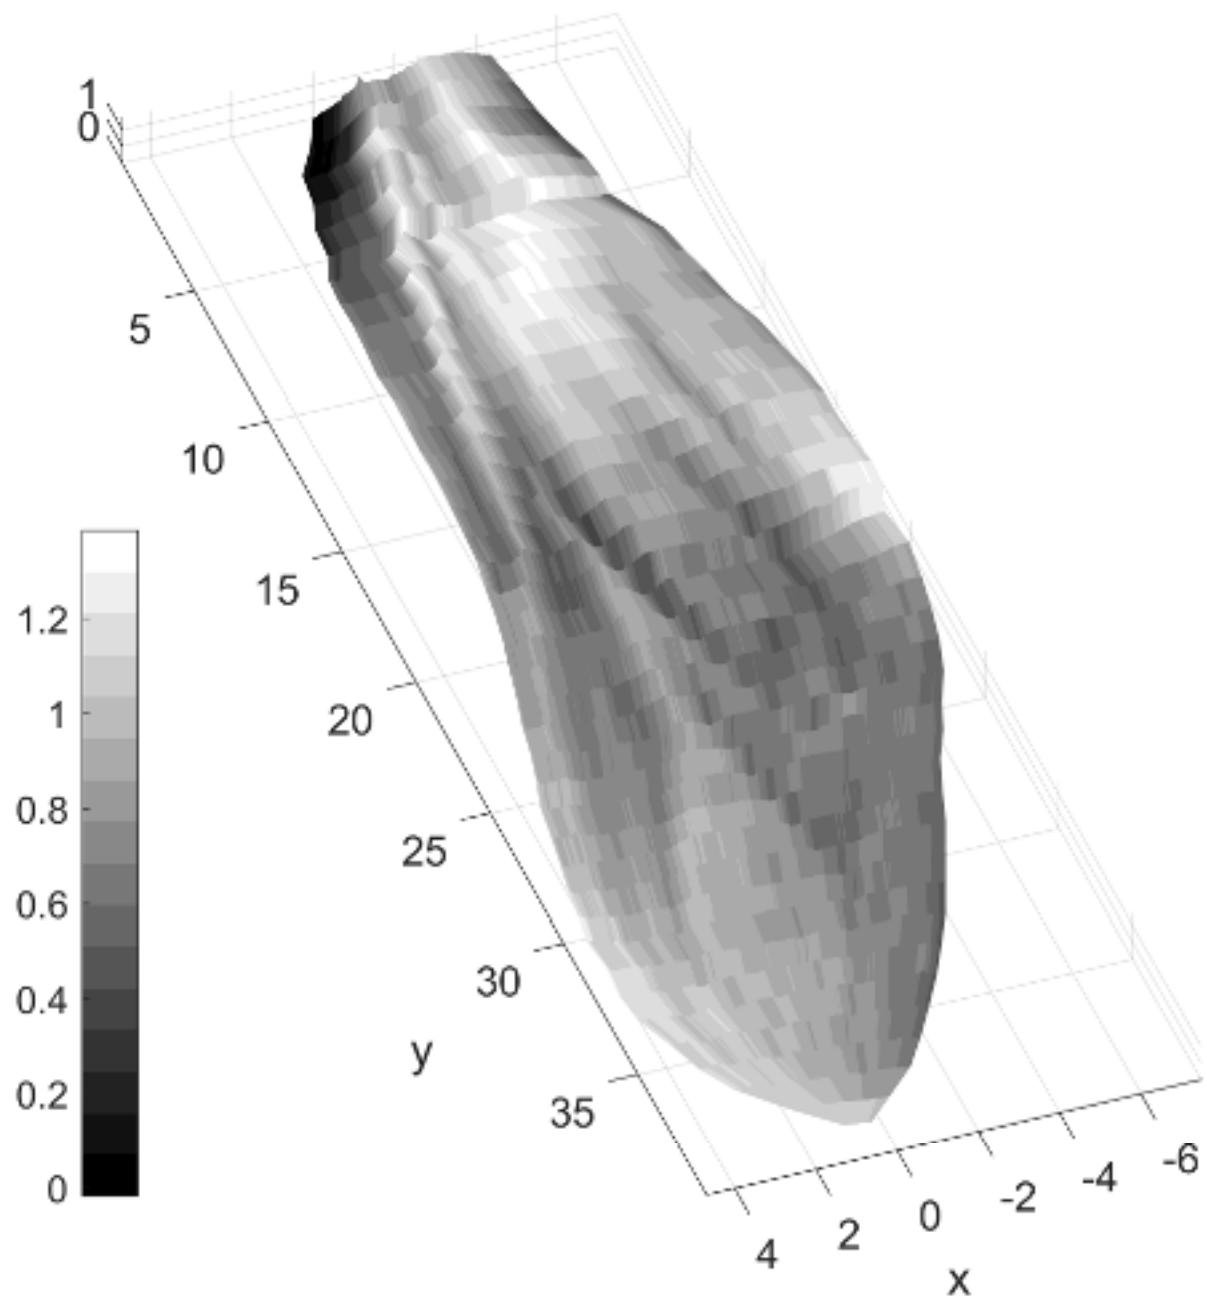

## Hind wing

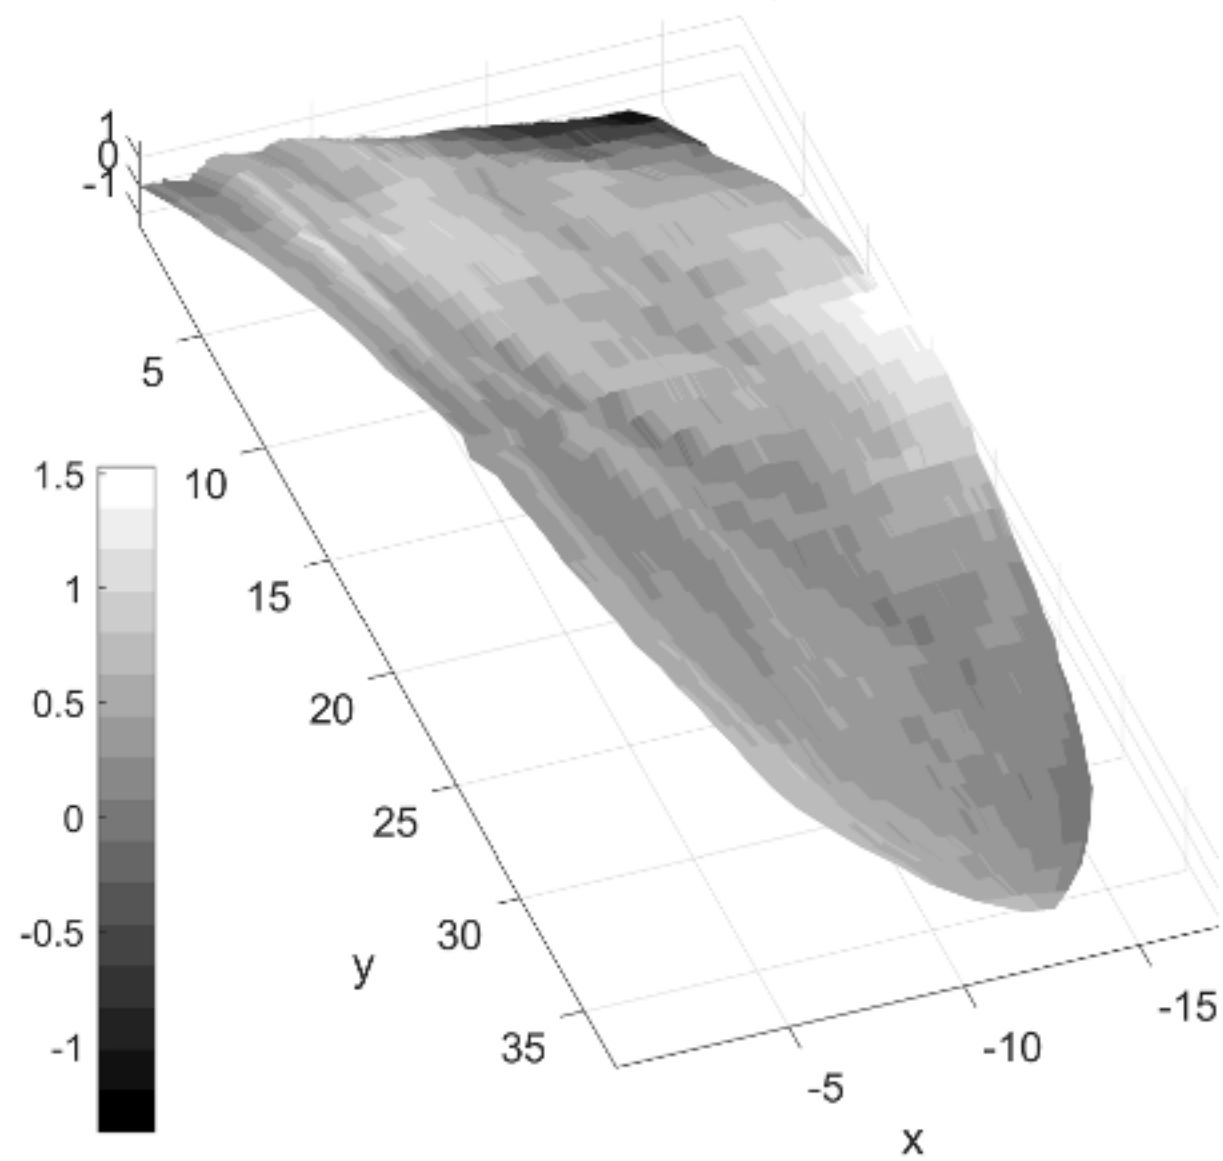

# Aeshna mixta-F2-museum

## Forewing

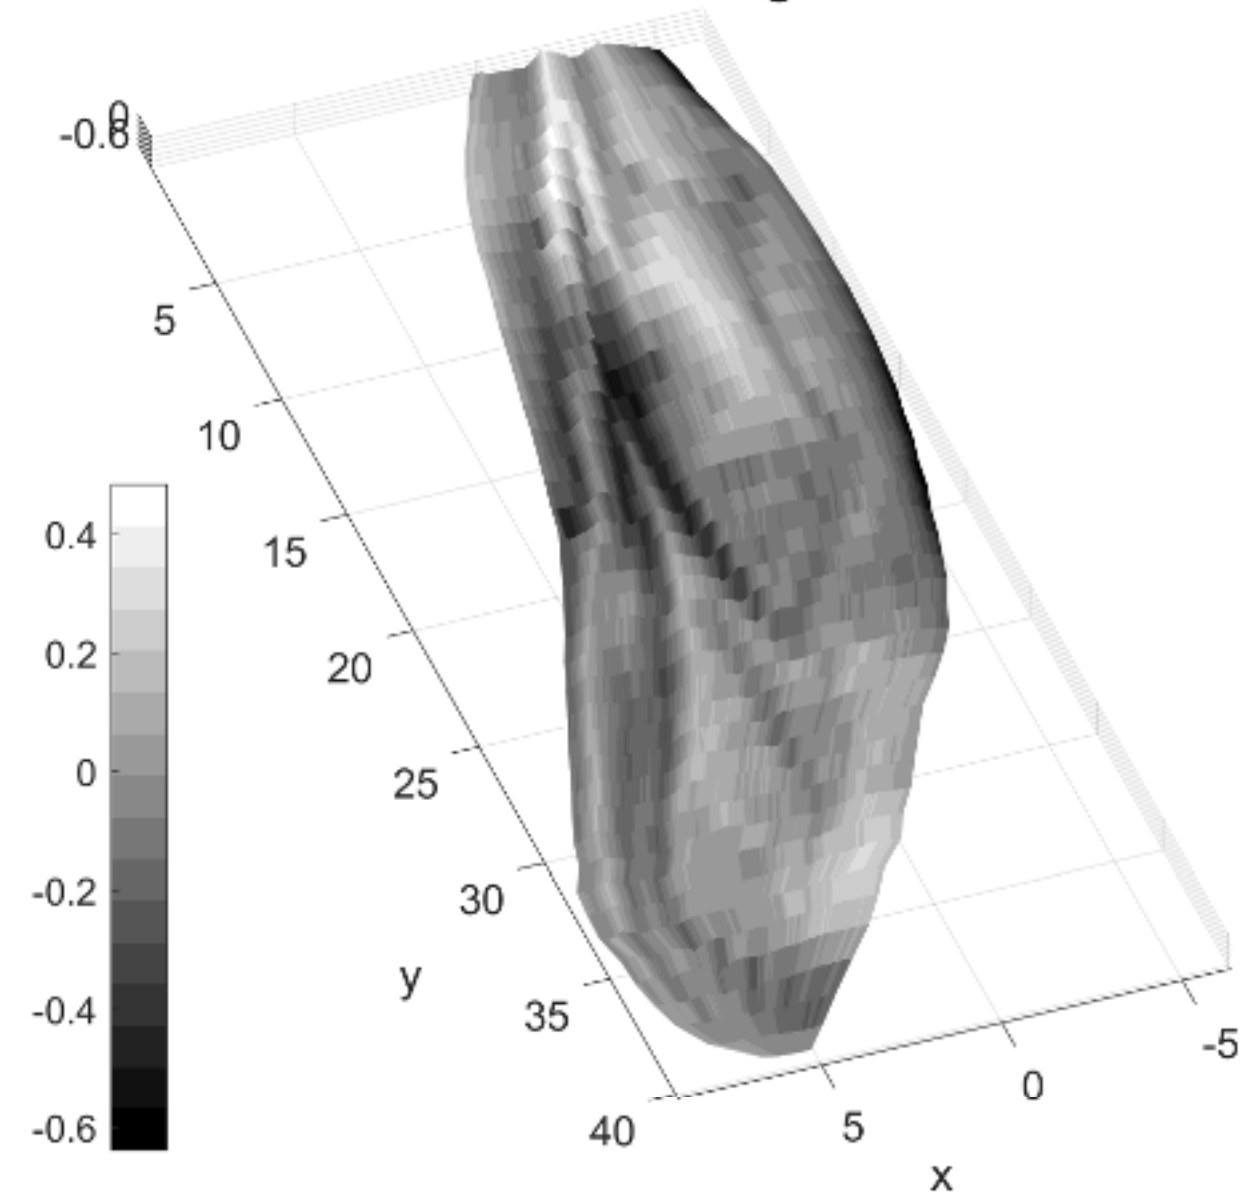

## Hind wing

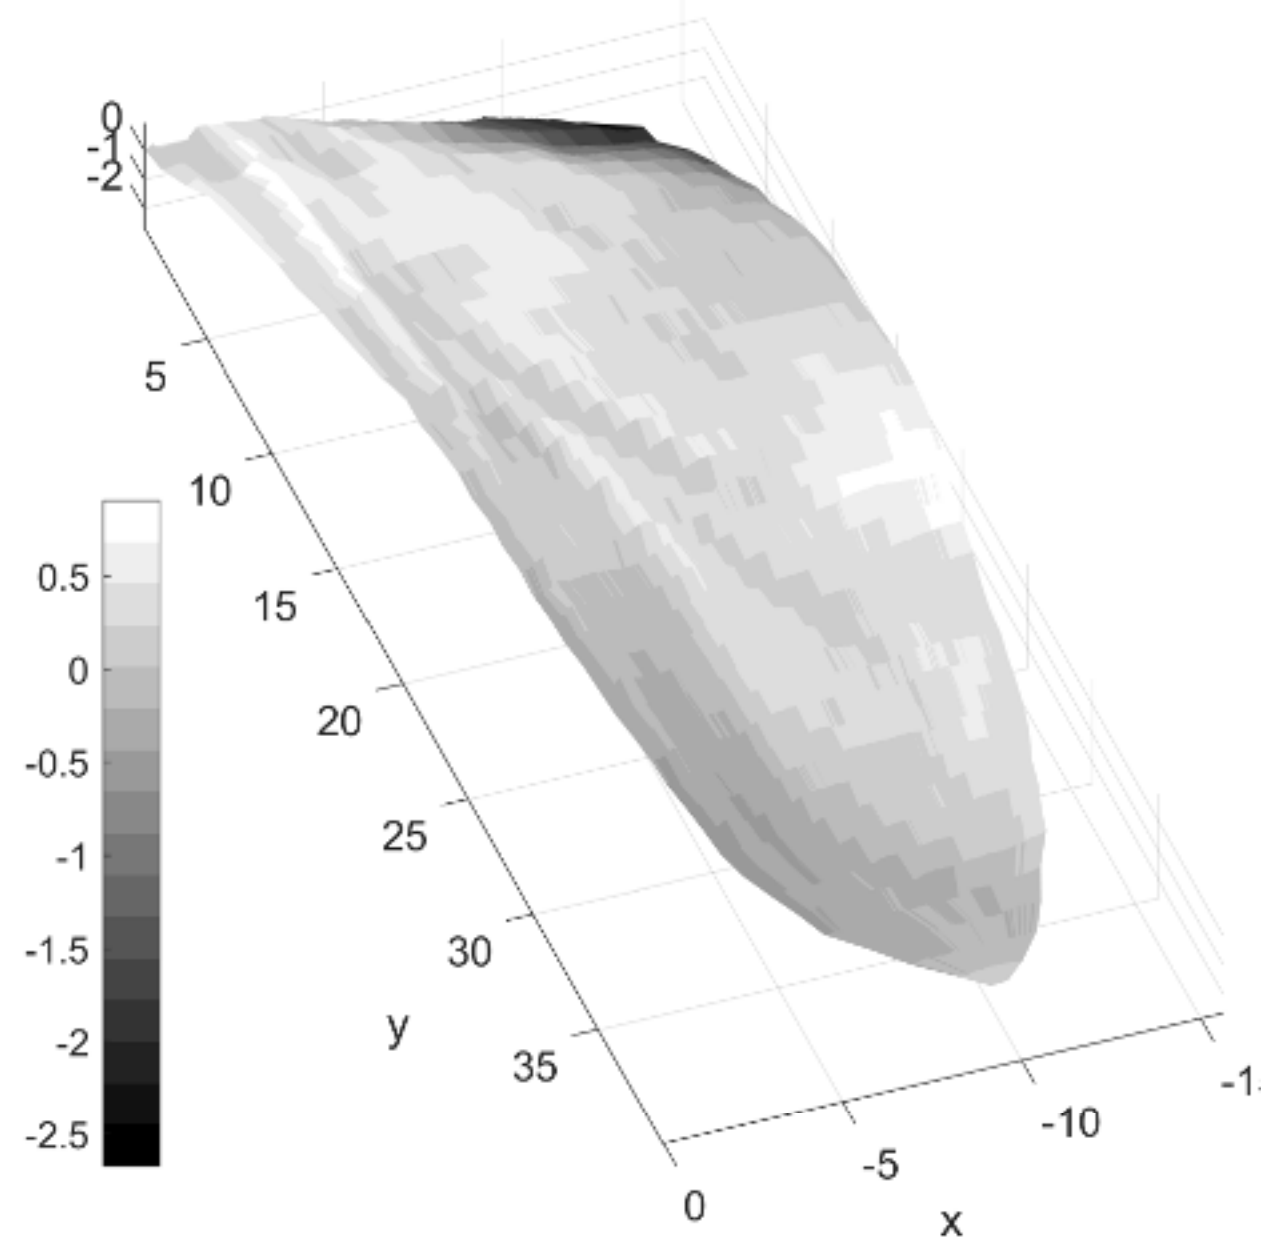

# Aeshna mixta-M1-museum

## Forewing

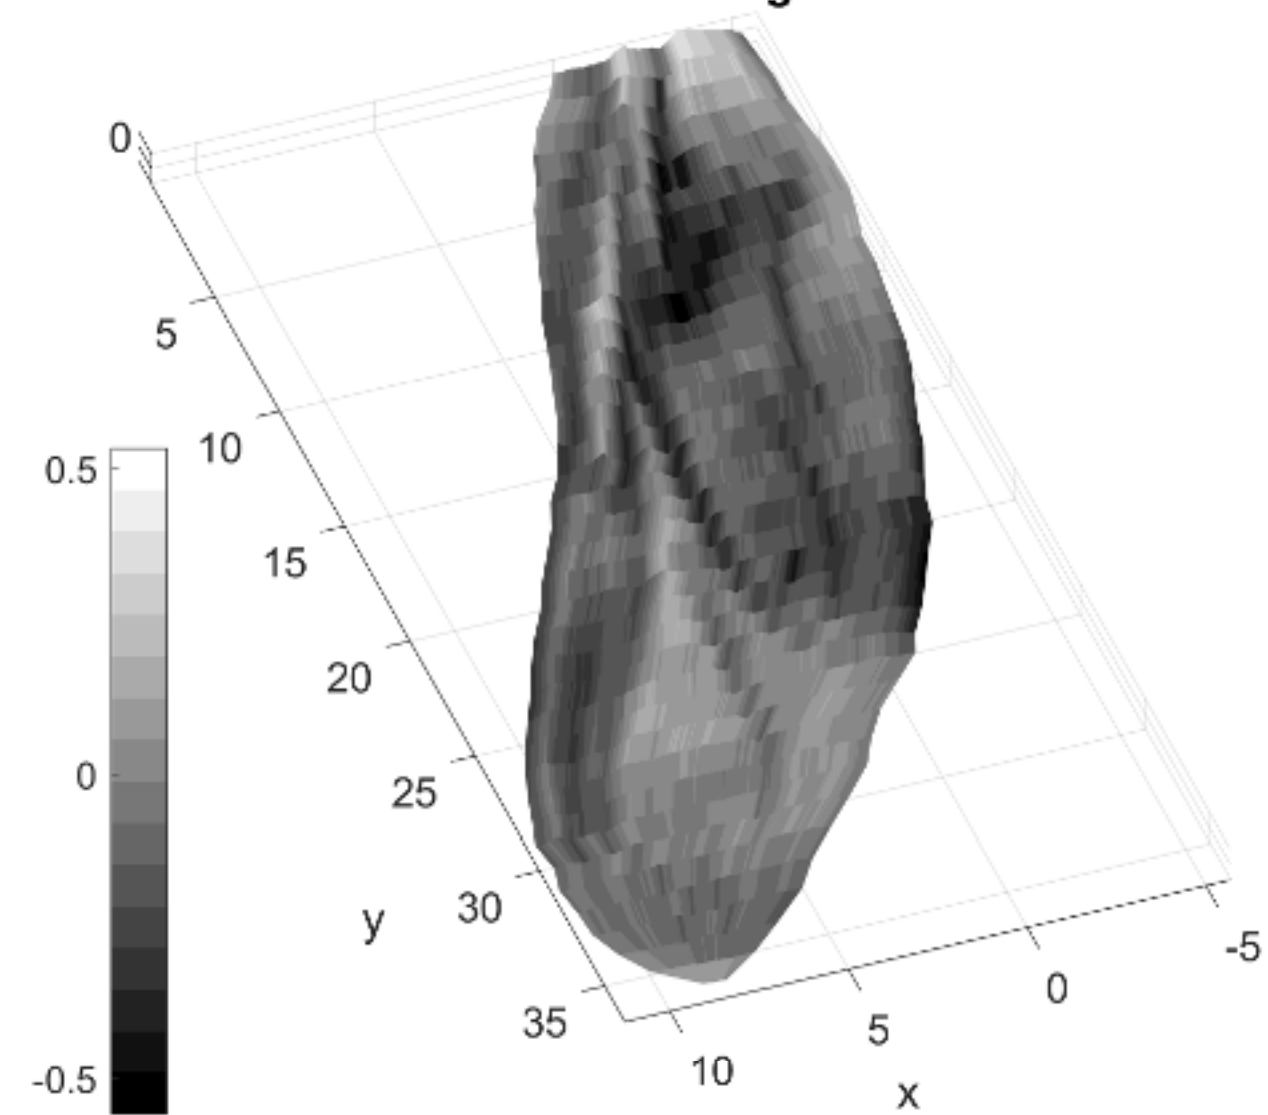

## Hind wing

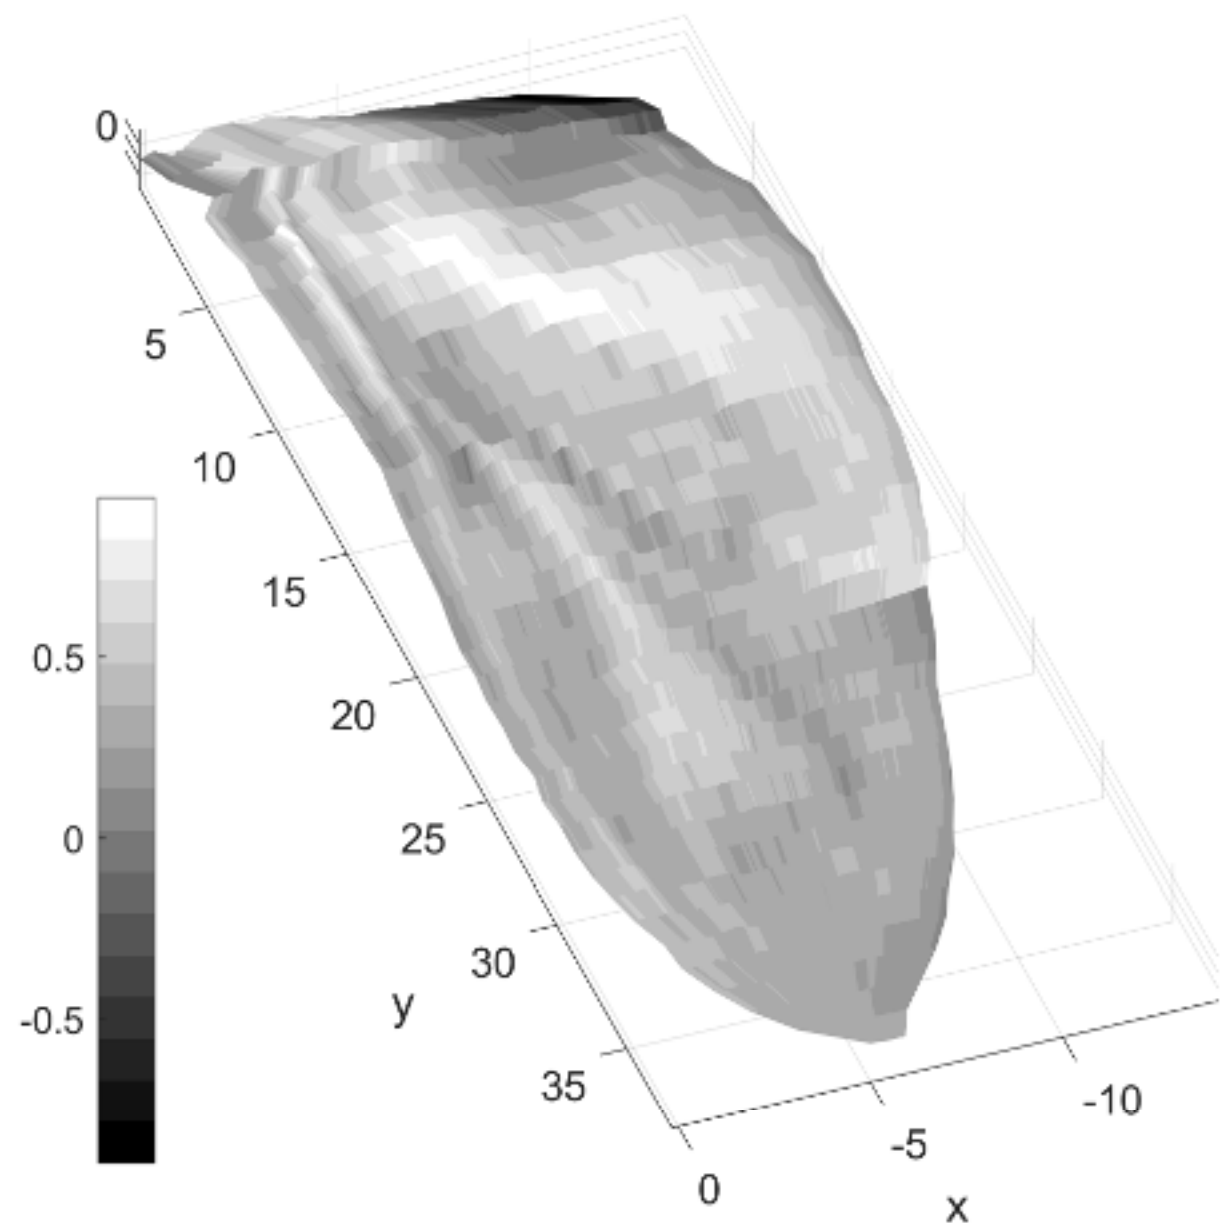

# Aeshna mixta-M2-museum

## Forewing

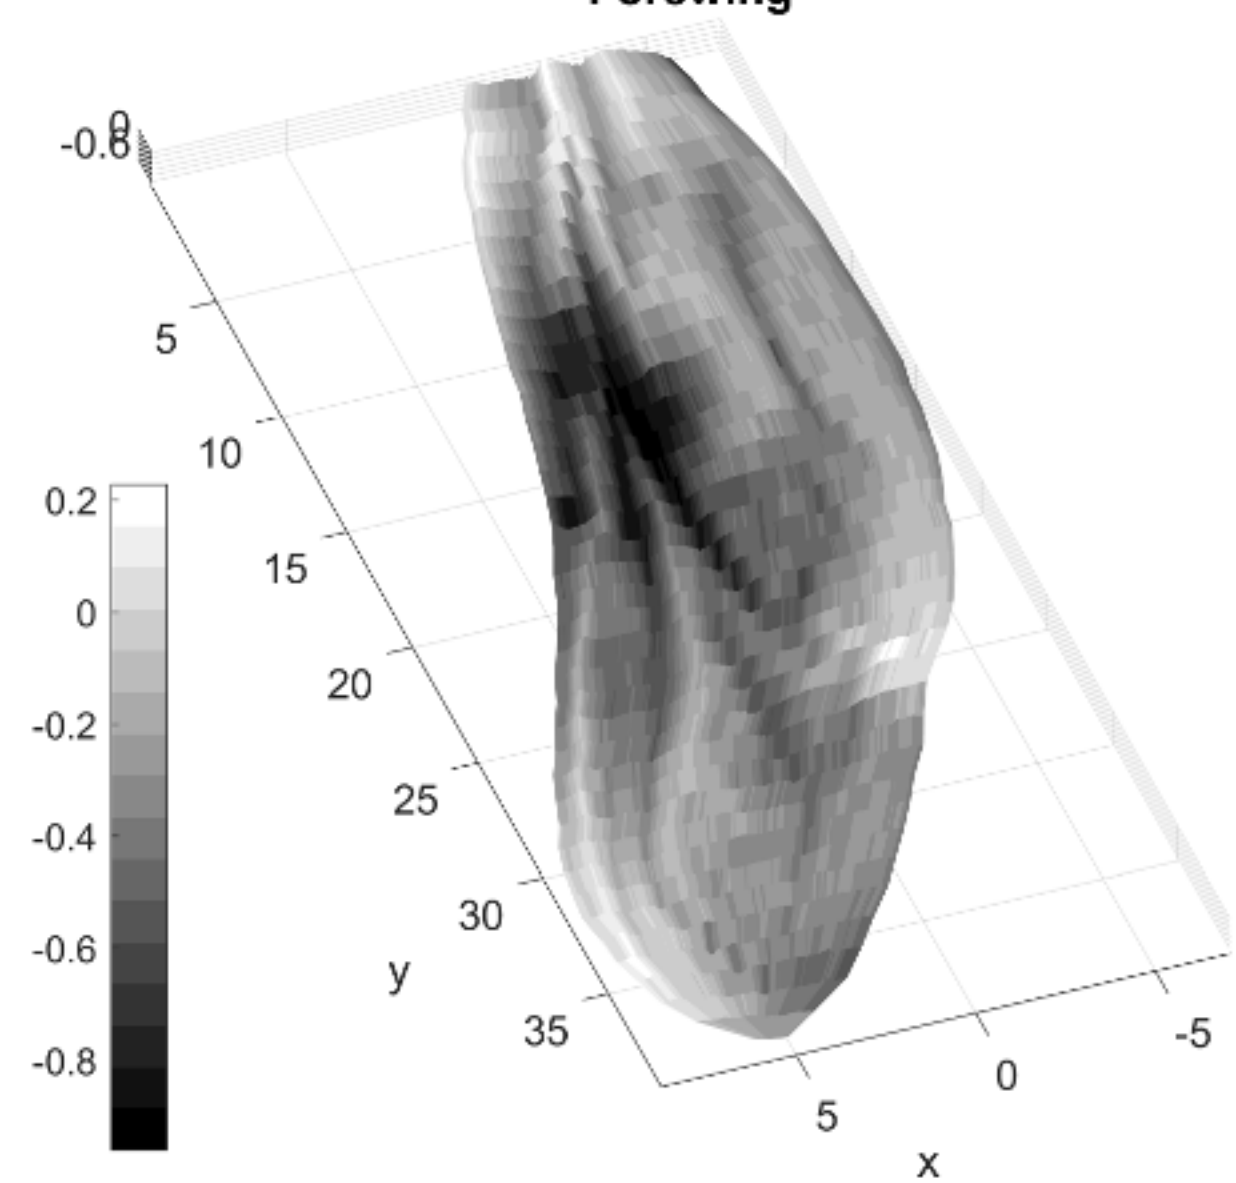

## Hind wing

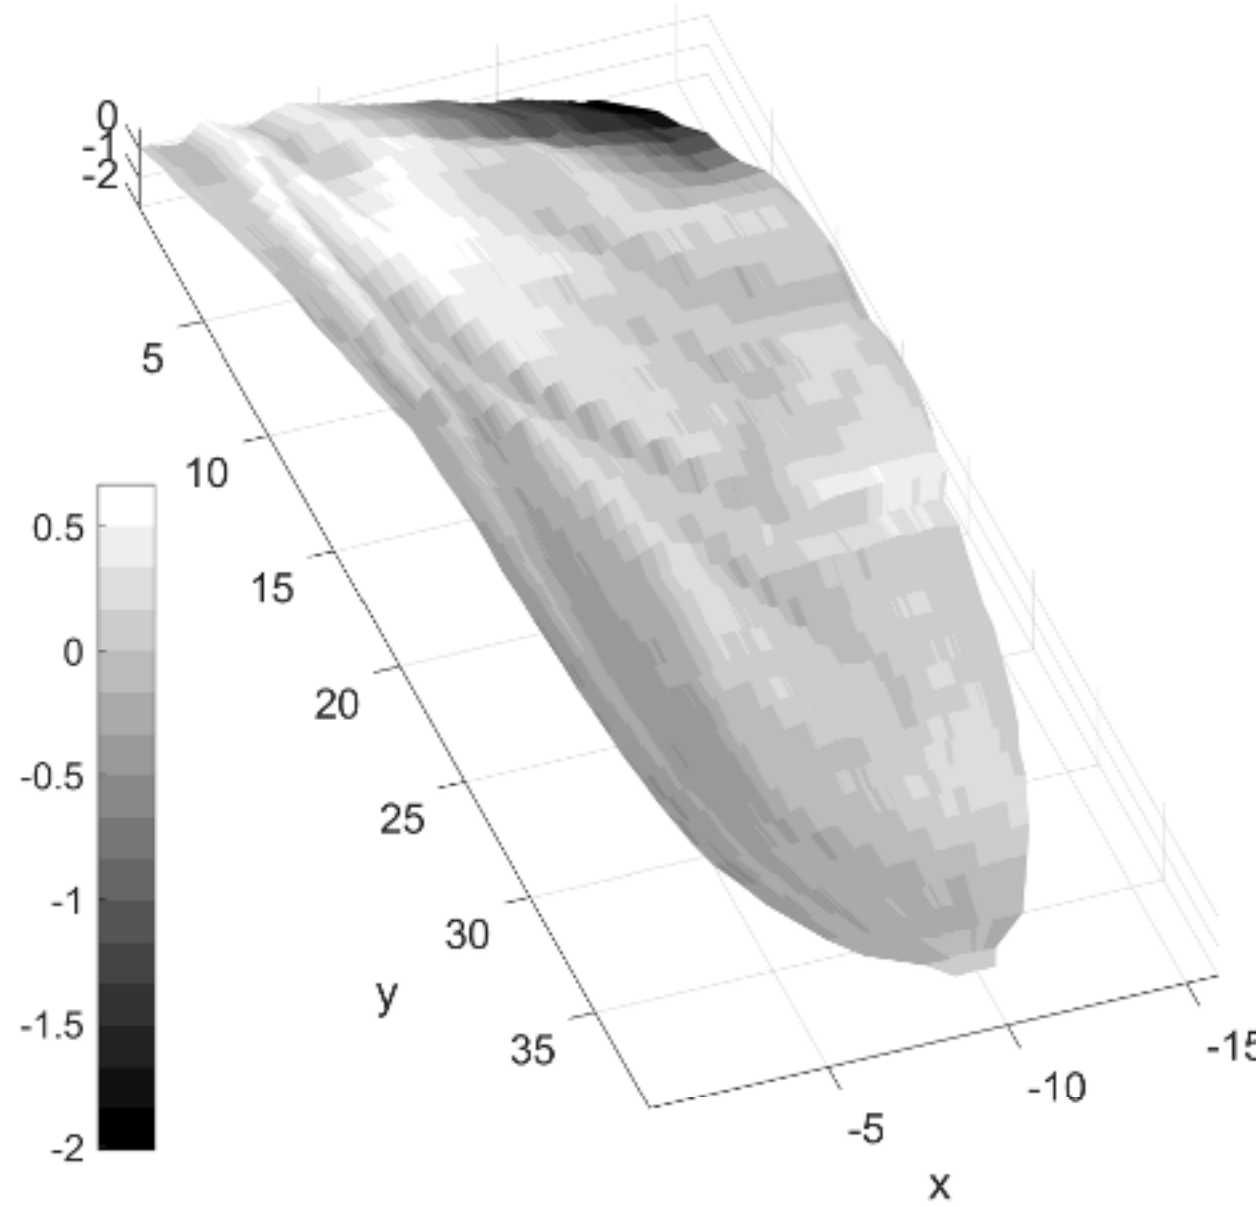

# Aeshna mixta-M3-museum

## Forewing

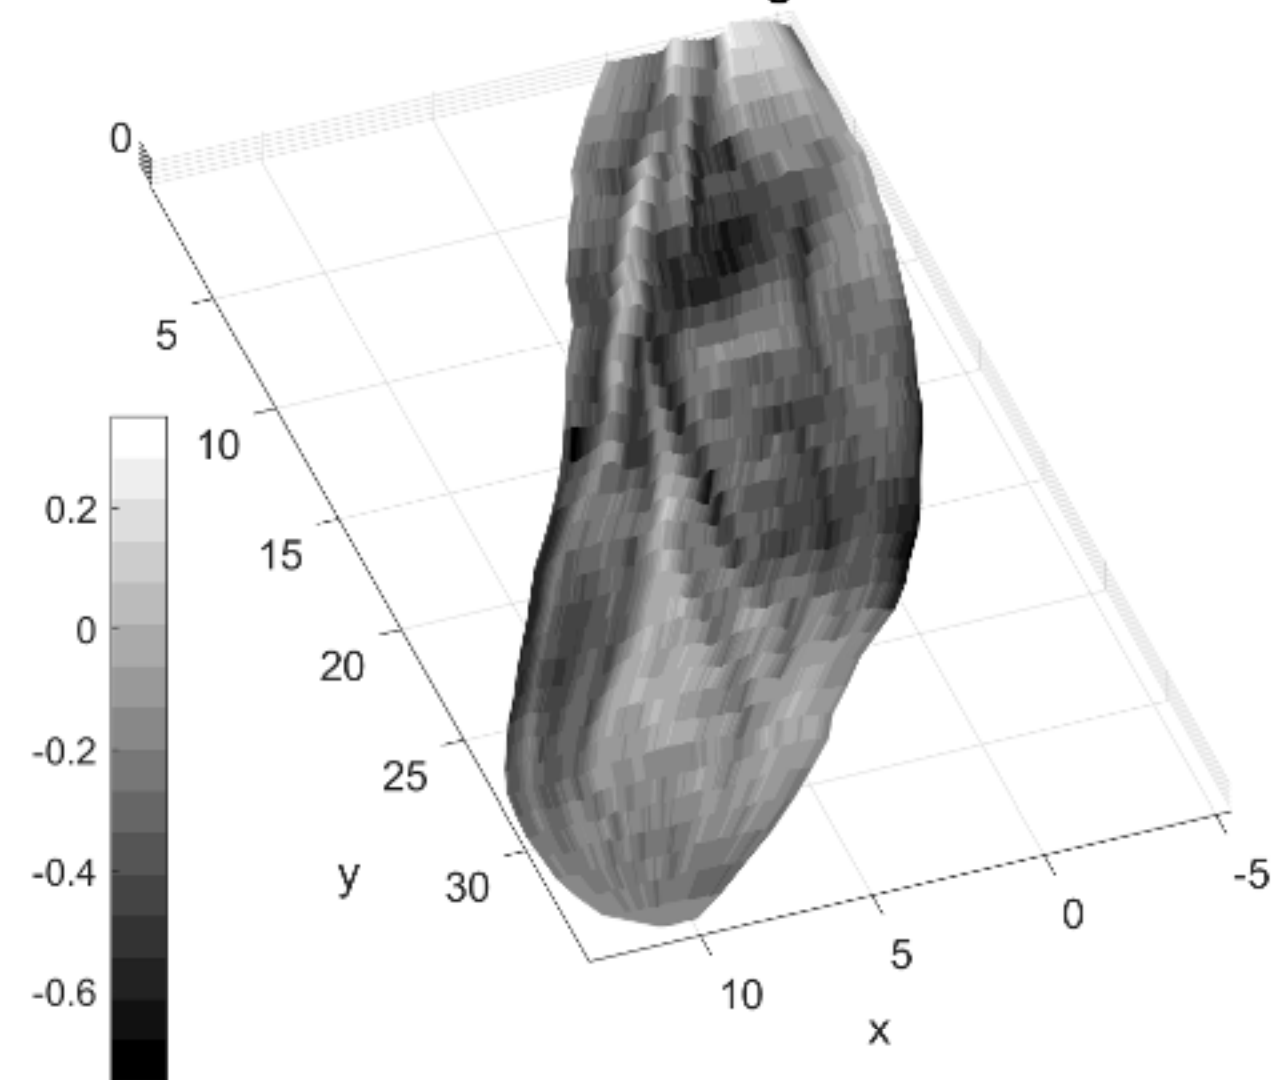

## Hind wing

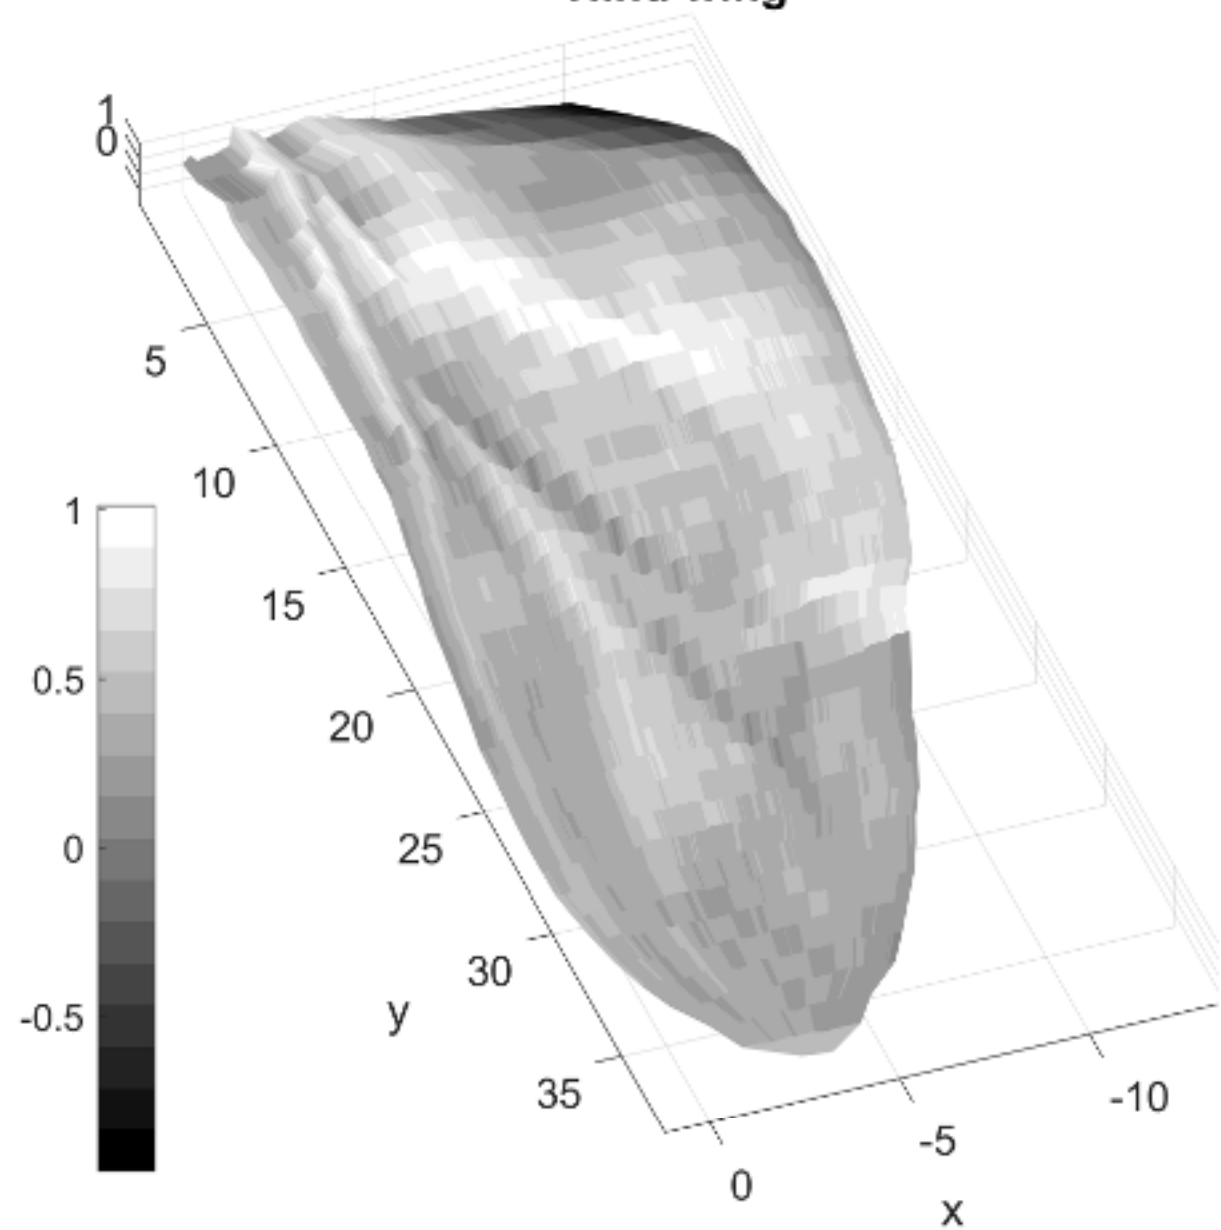

# Anax speratus-F1-museum

## Forewing

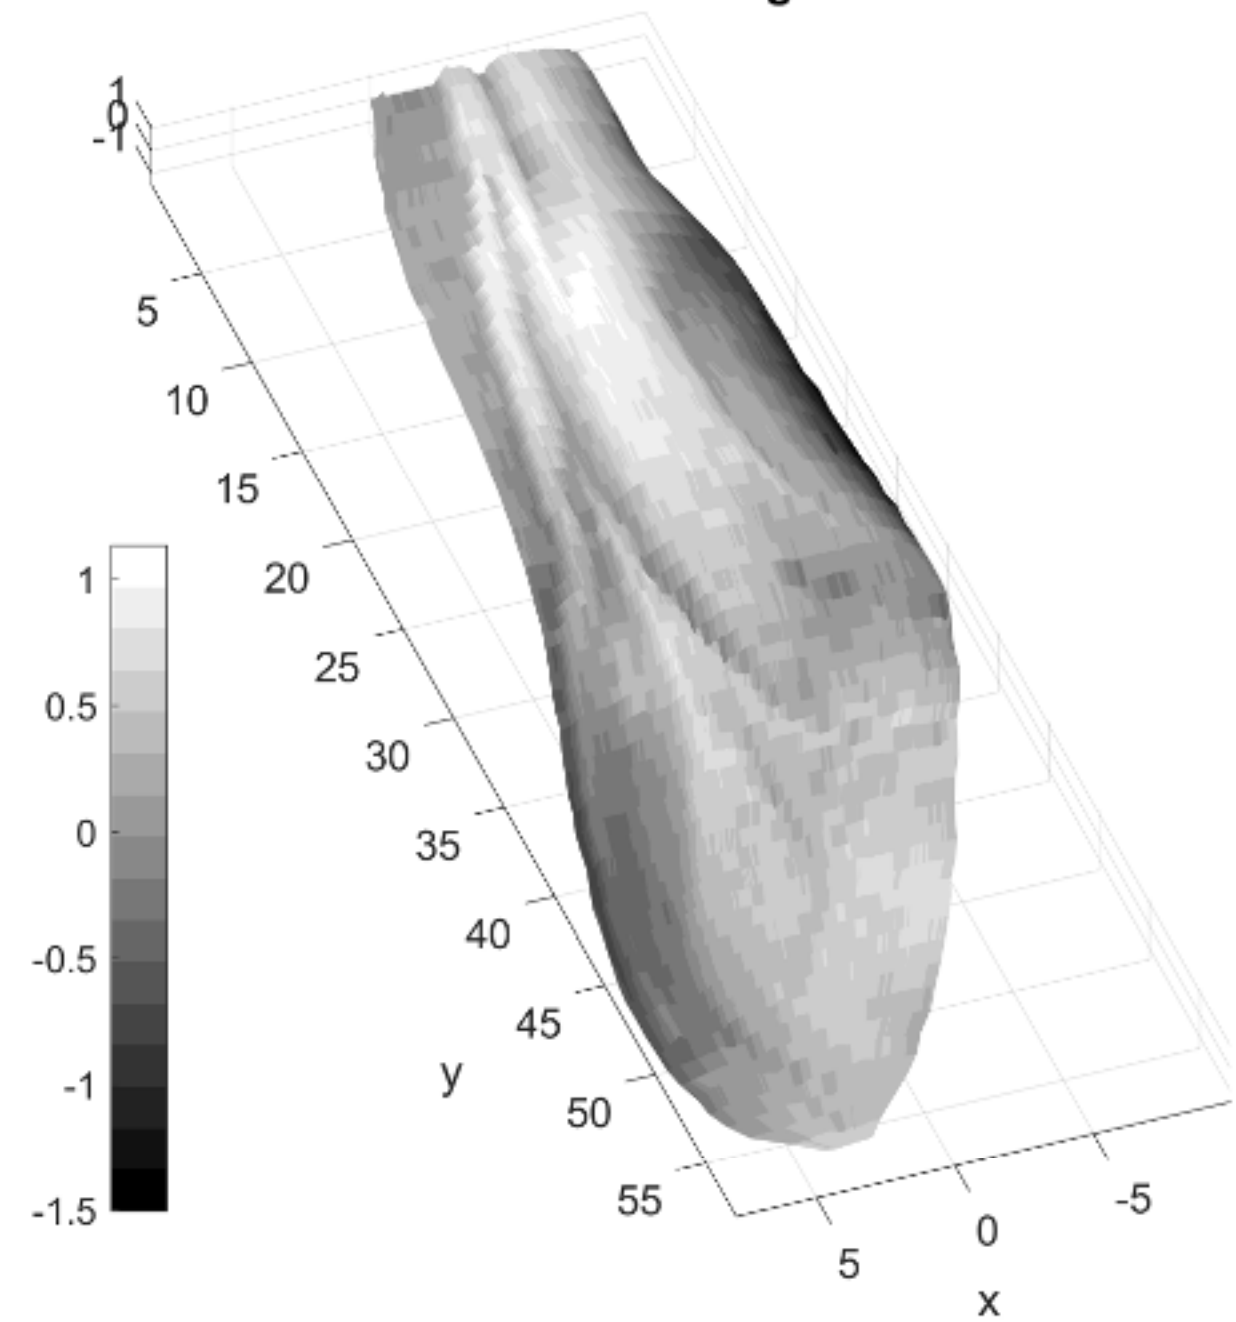

## Hind wing

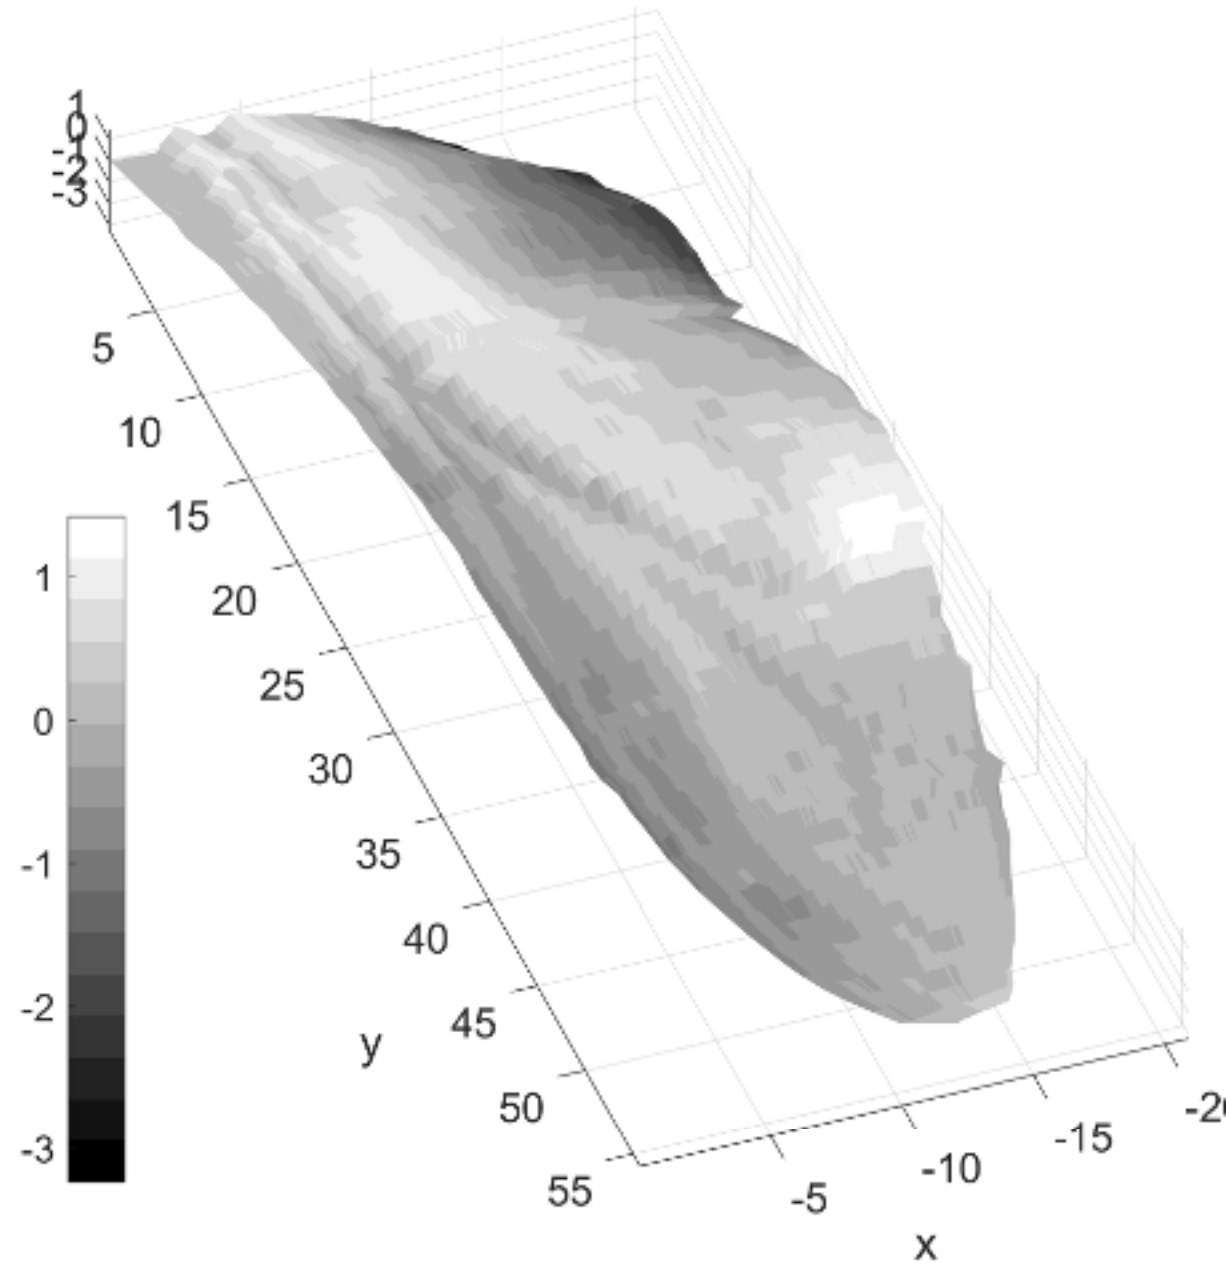

# Anax speratus-M1-museum

## Forewing

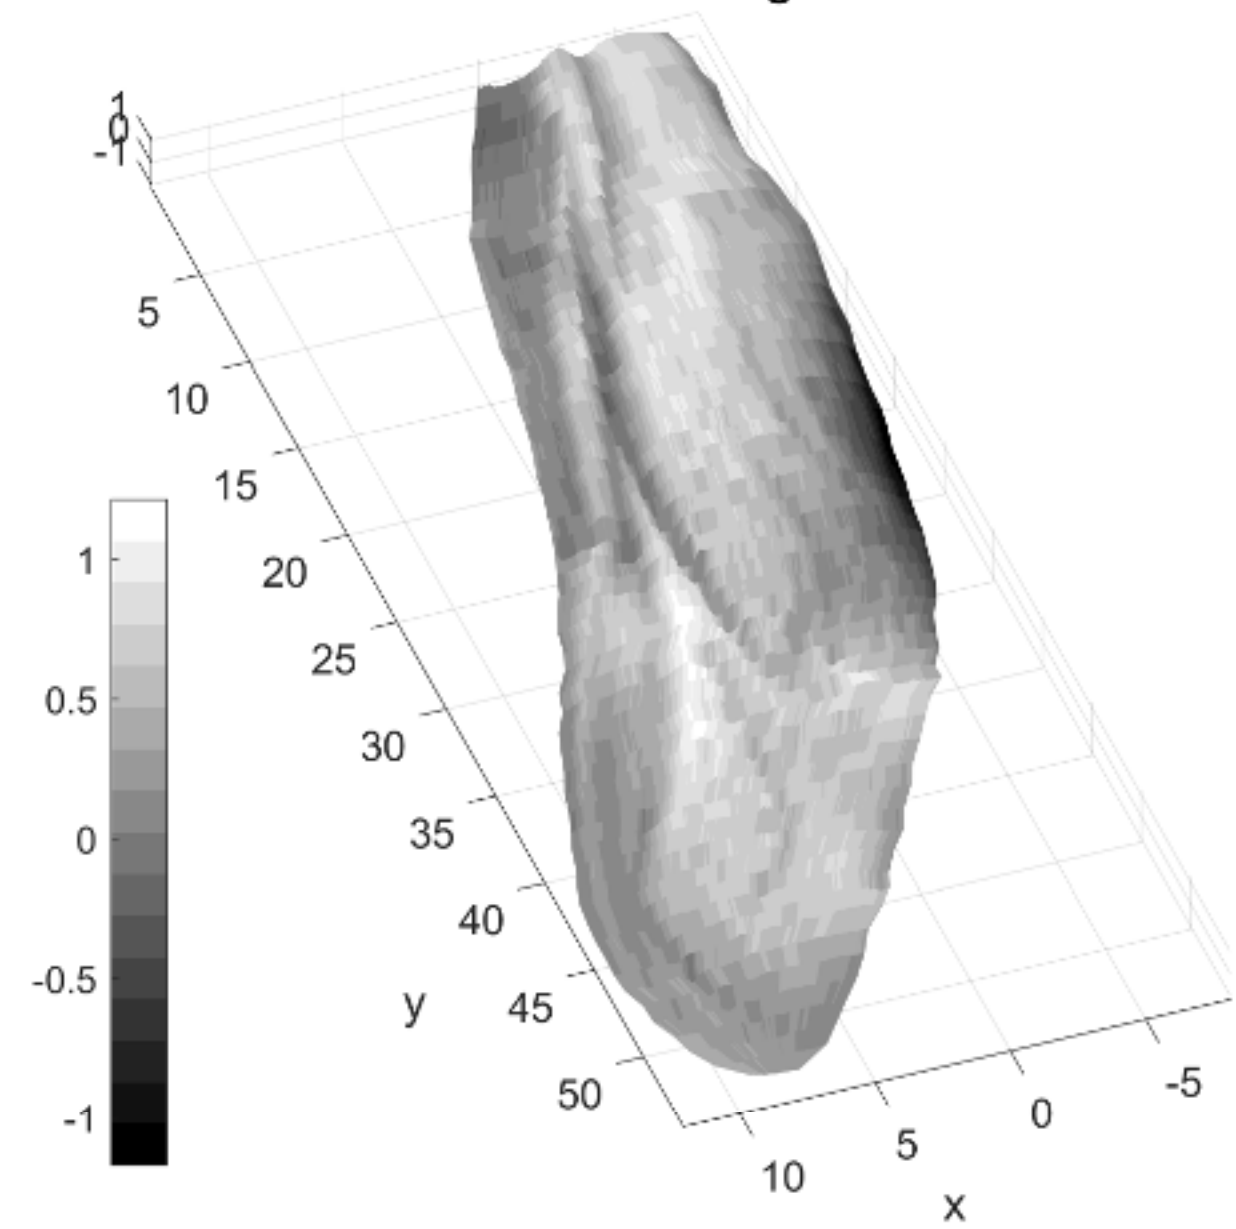

## Hind wing

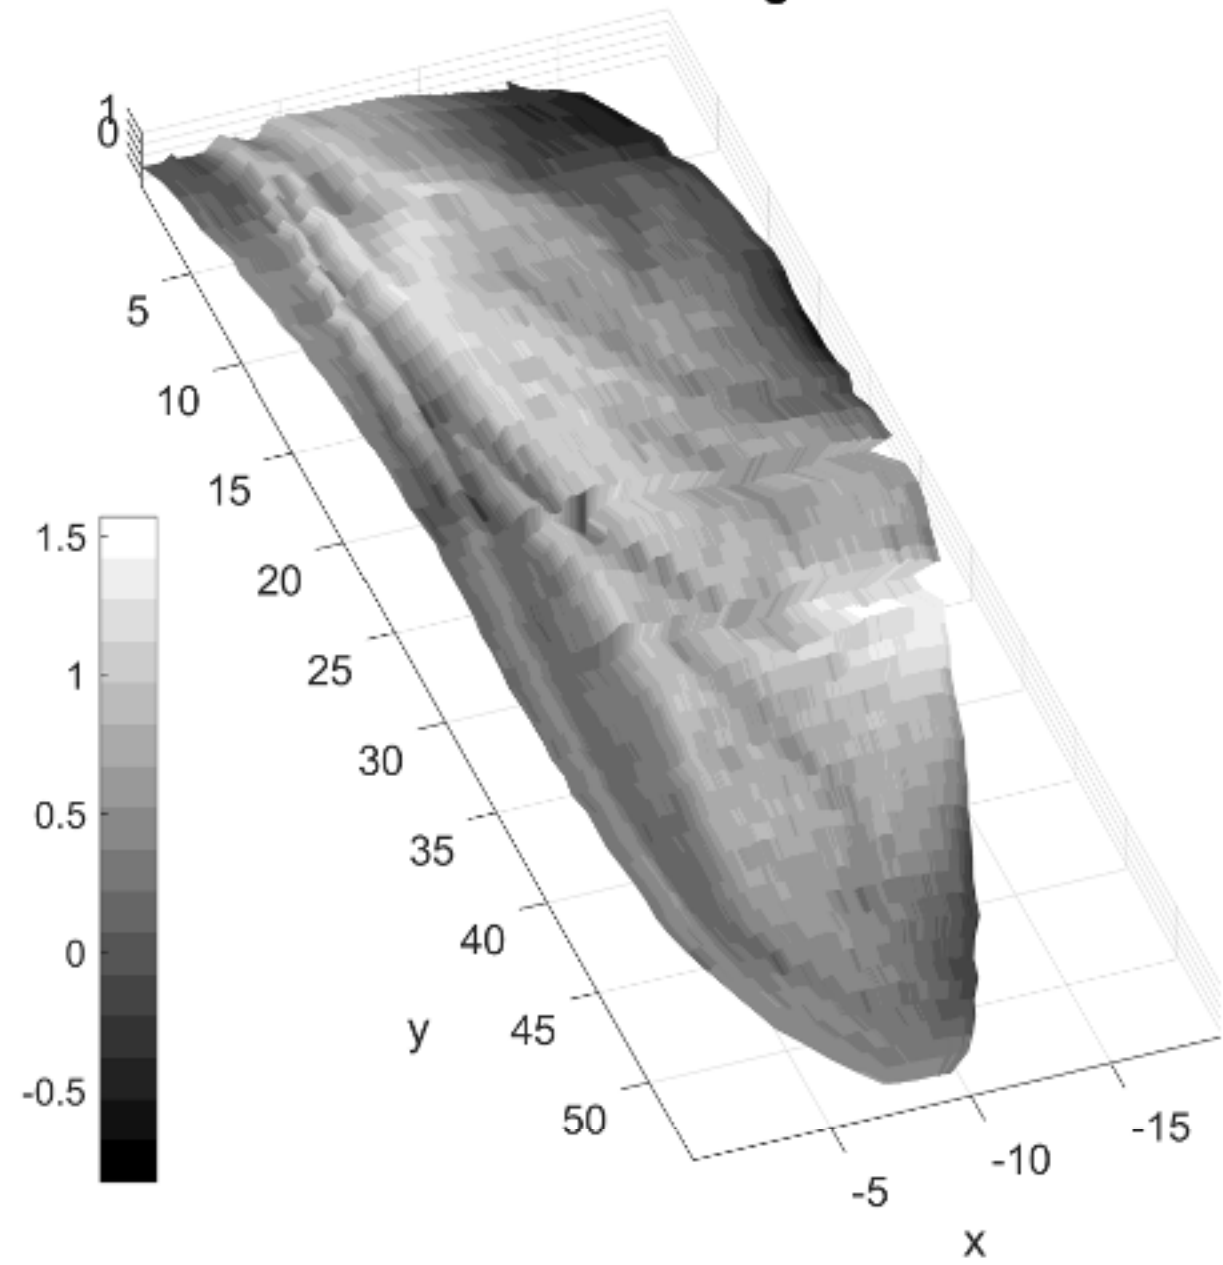

# Cordulia aenea-F1-museum

## Forewing

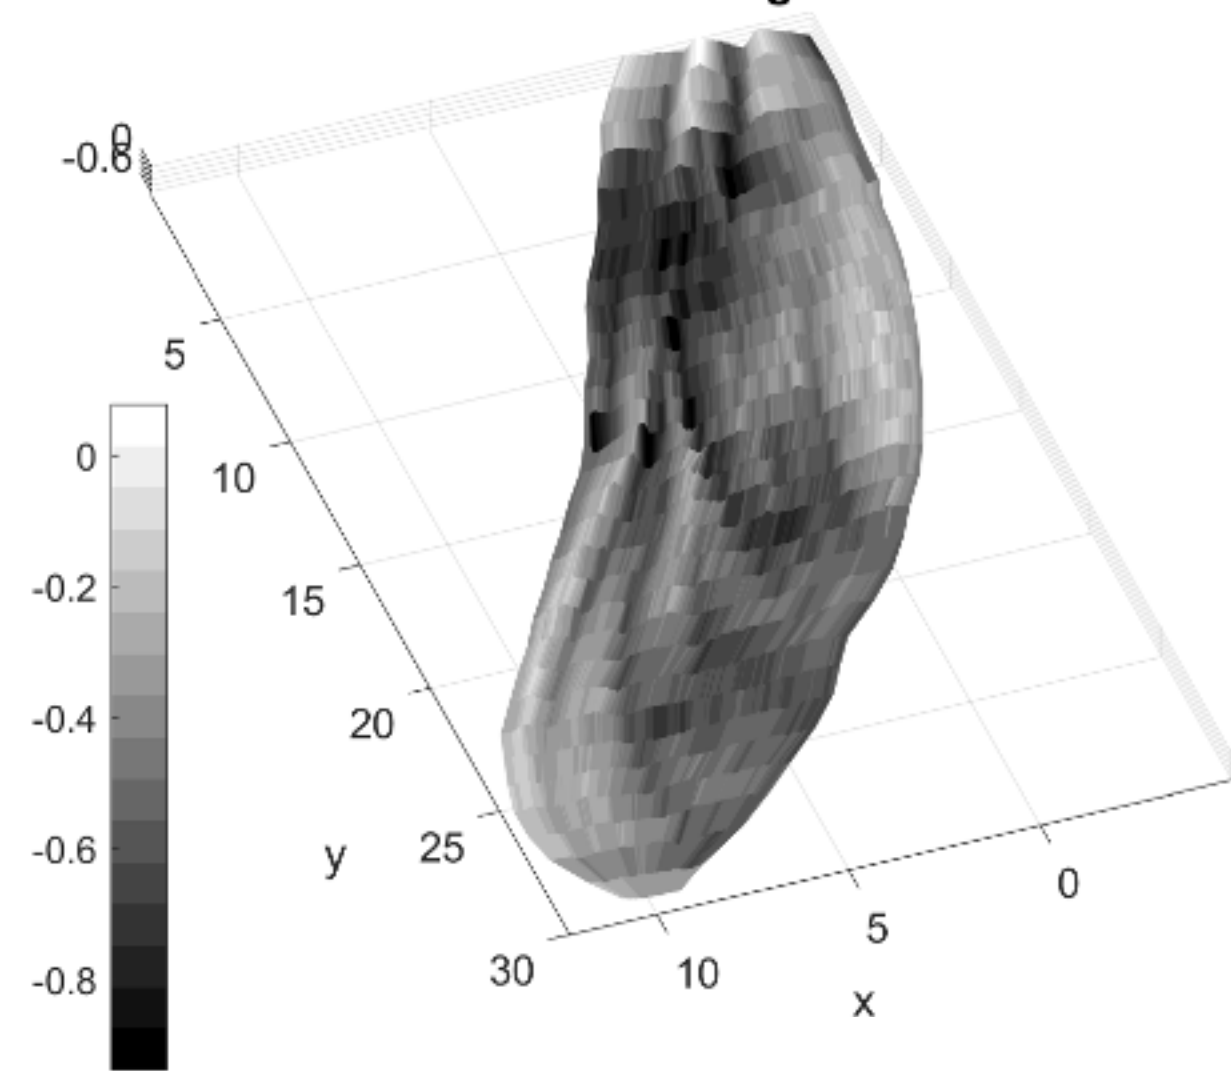

## Hind wing

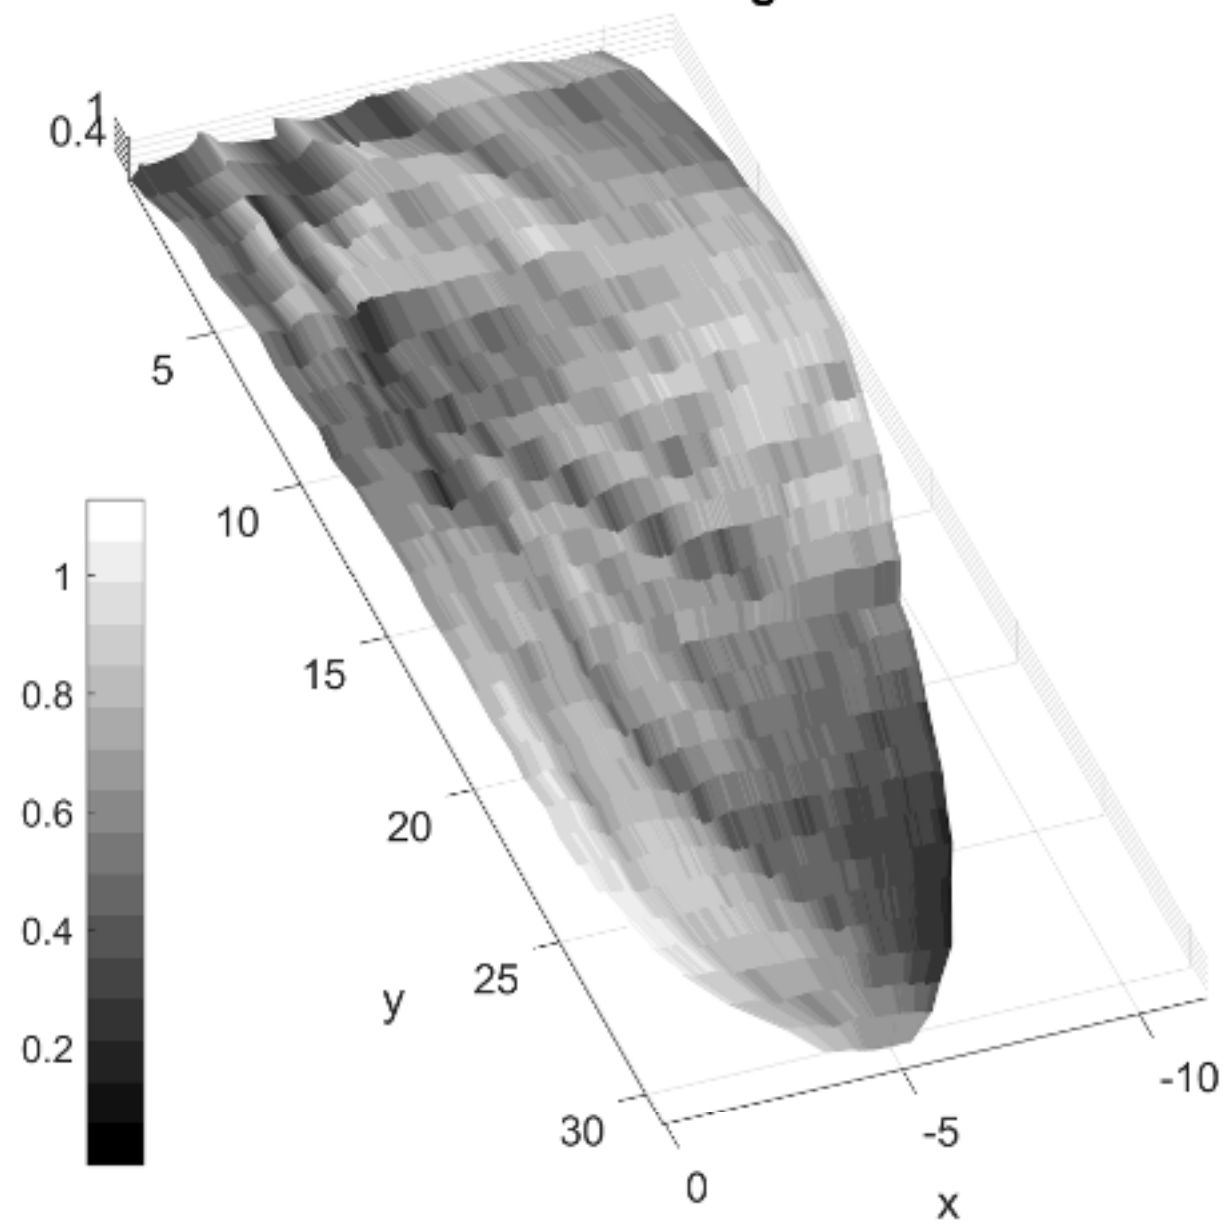



# Cordulia aenea-F2-museum

## Forewing

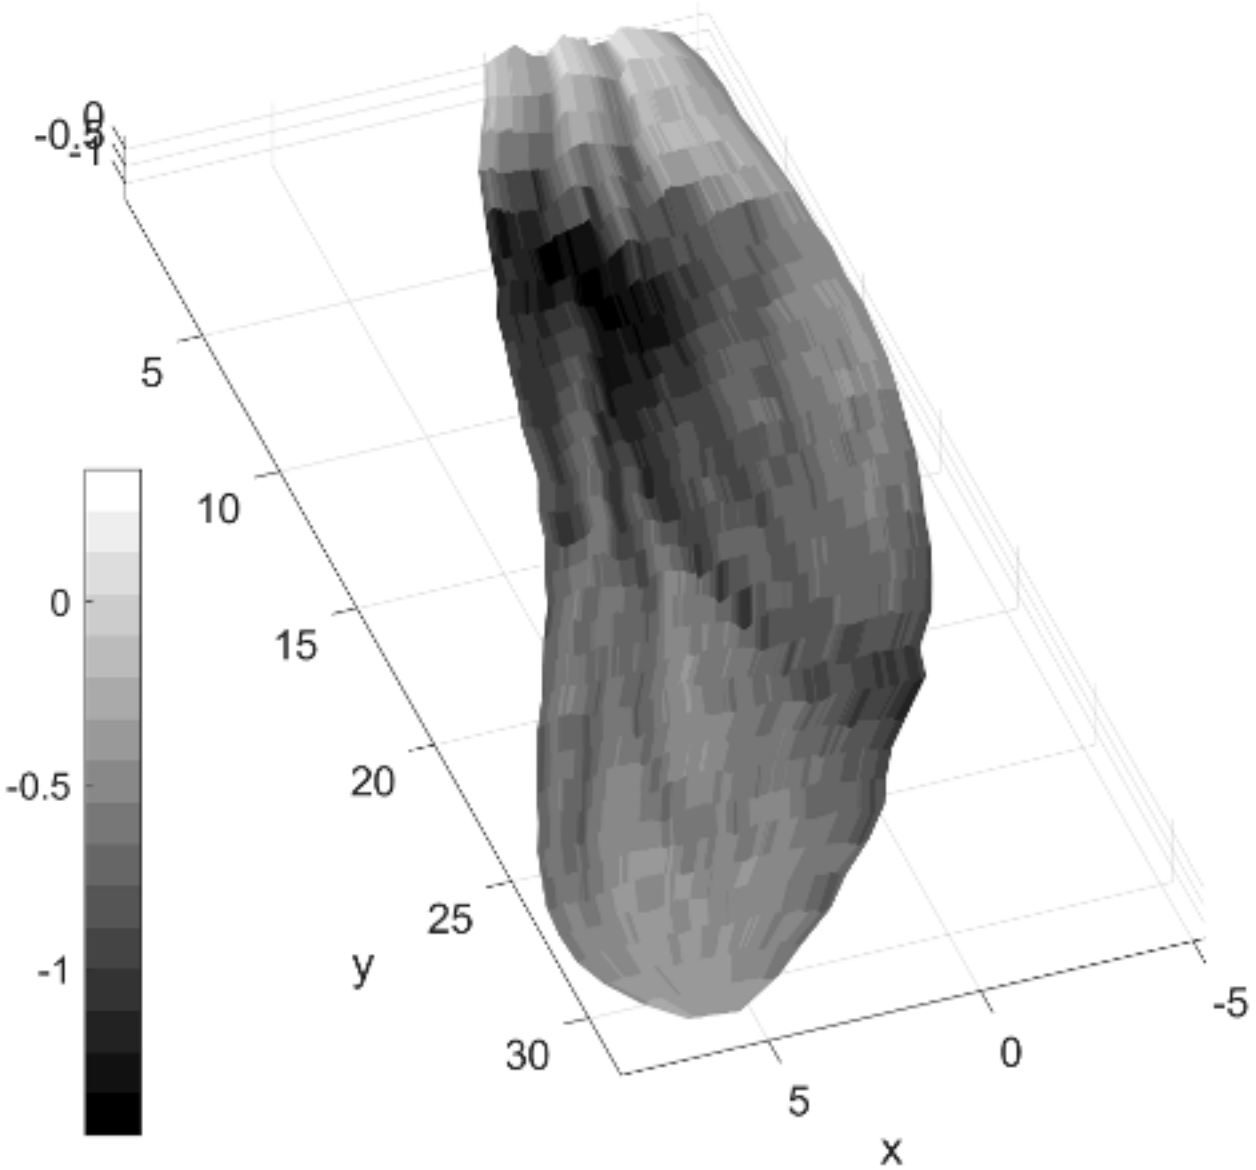

## Hind wing

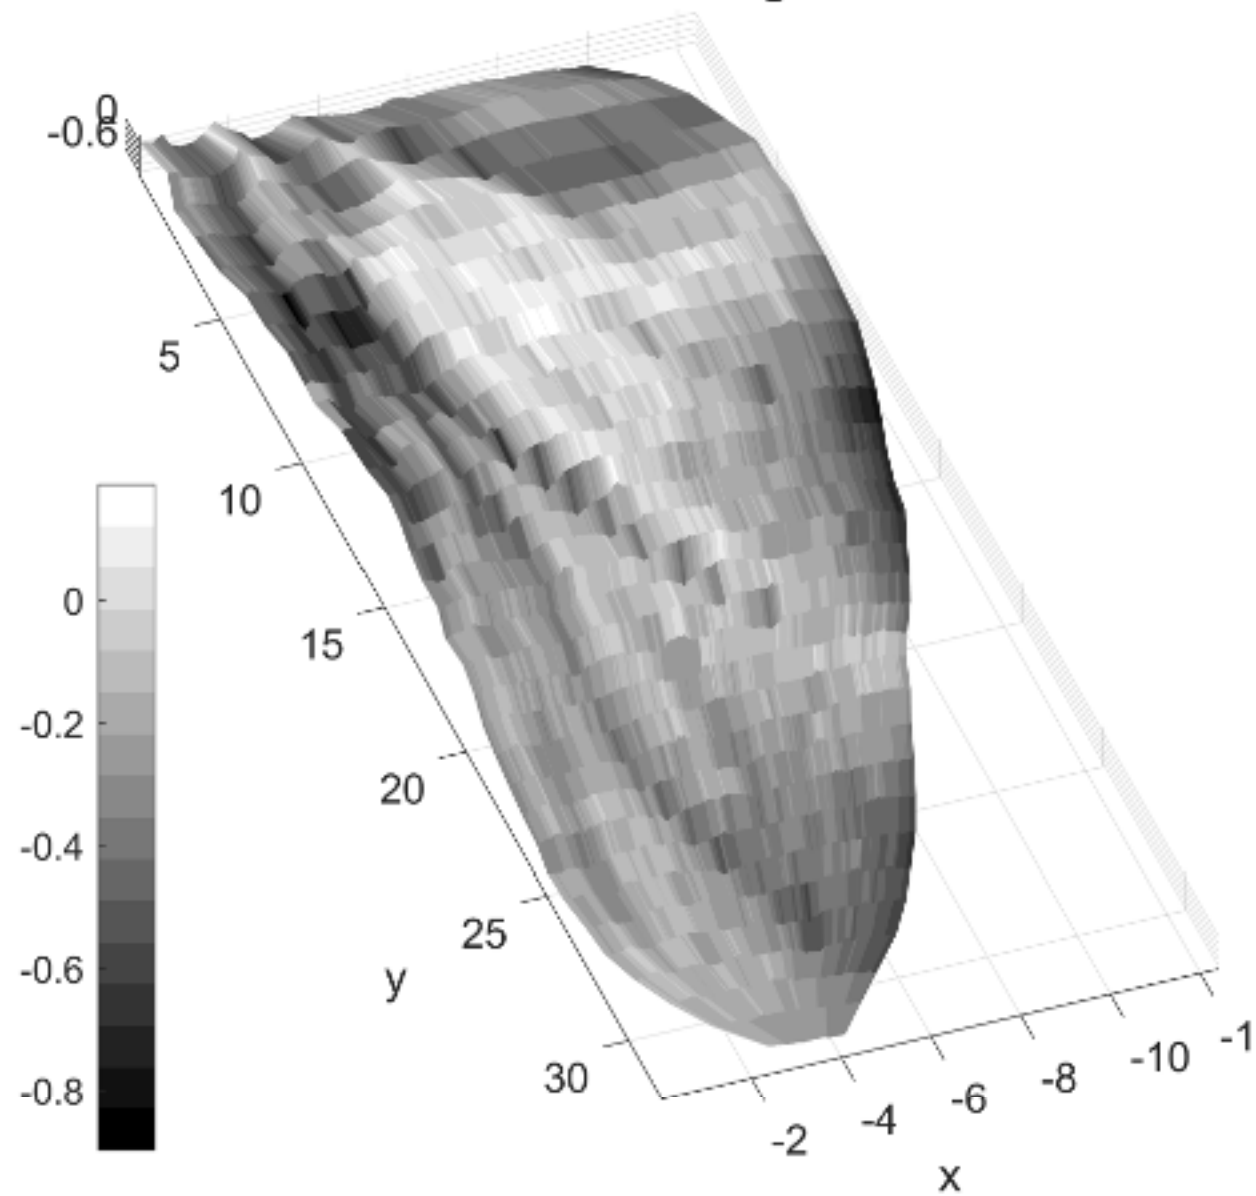

# Cordulia aenea-F3-museum

## Forewing

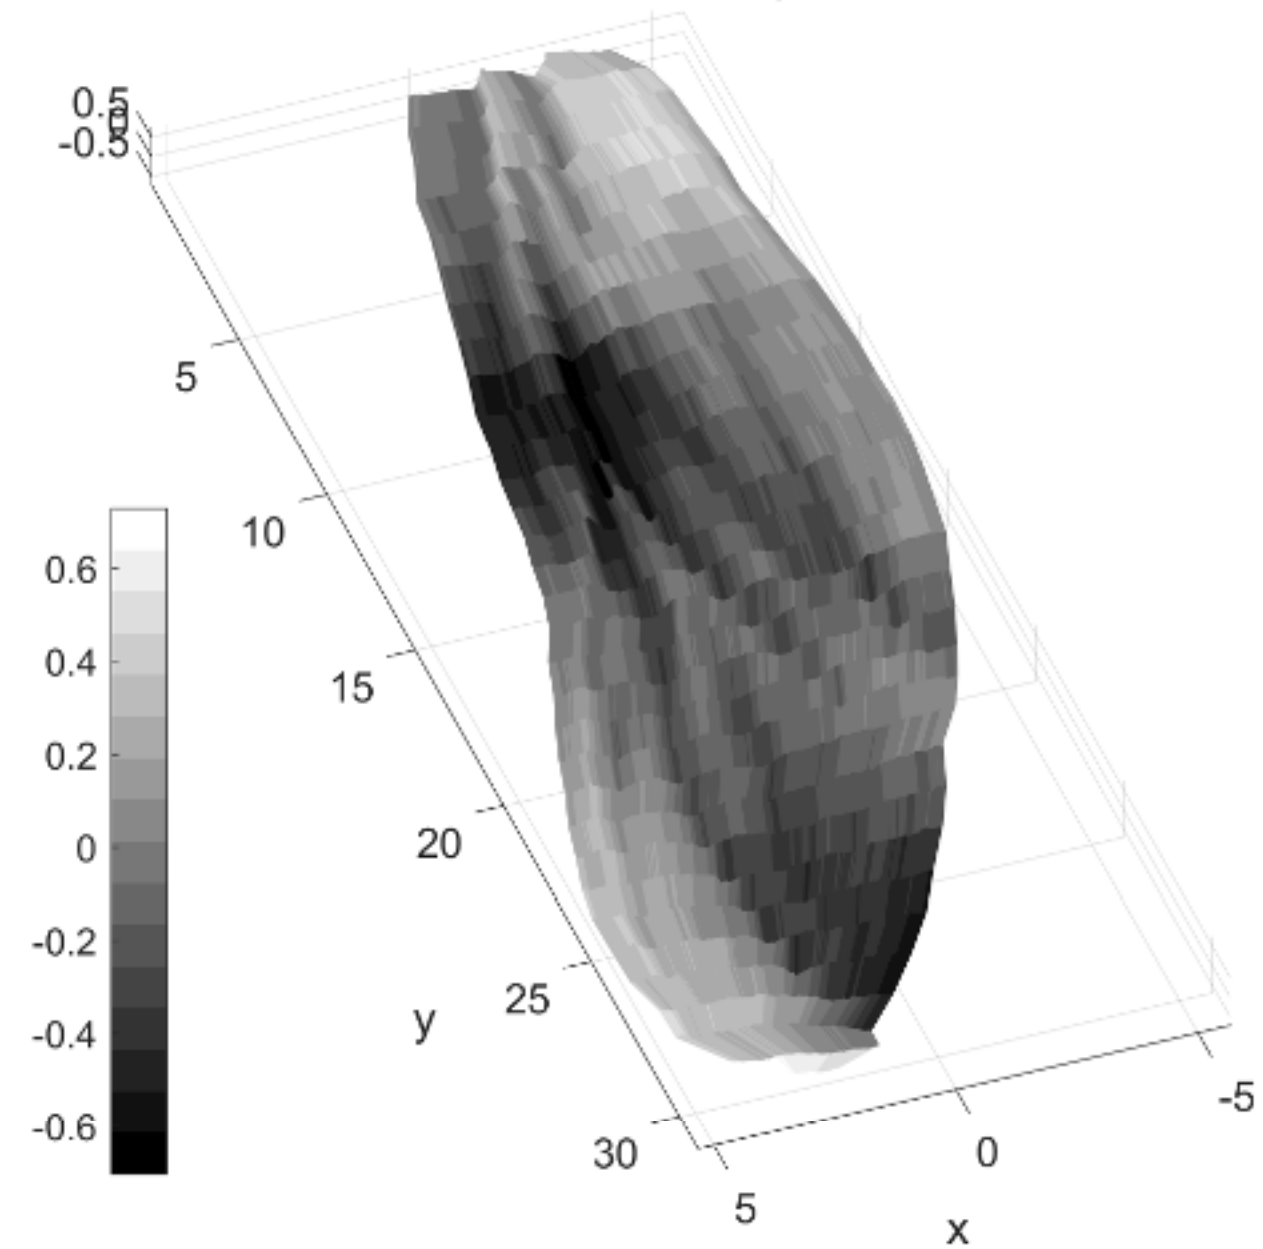

## Hind wing

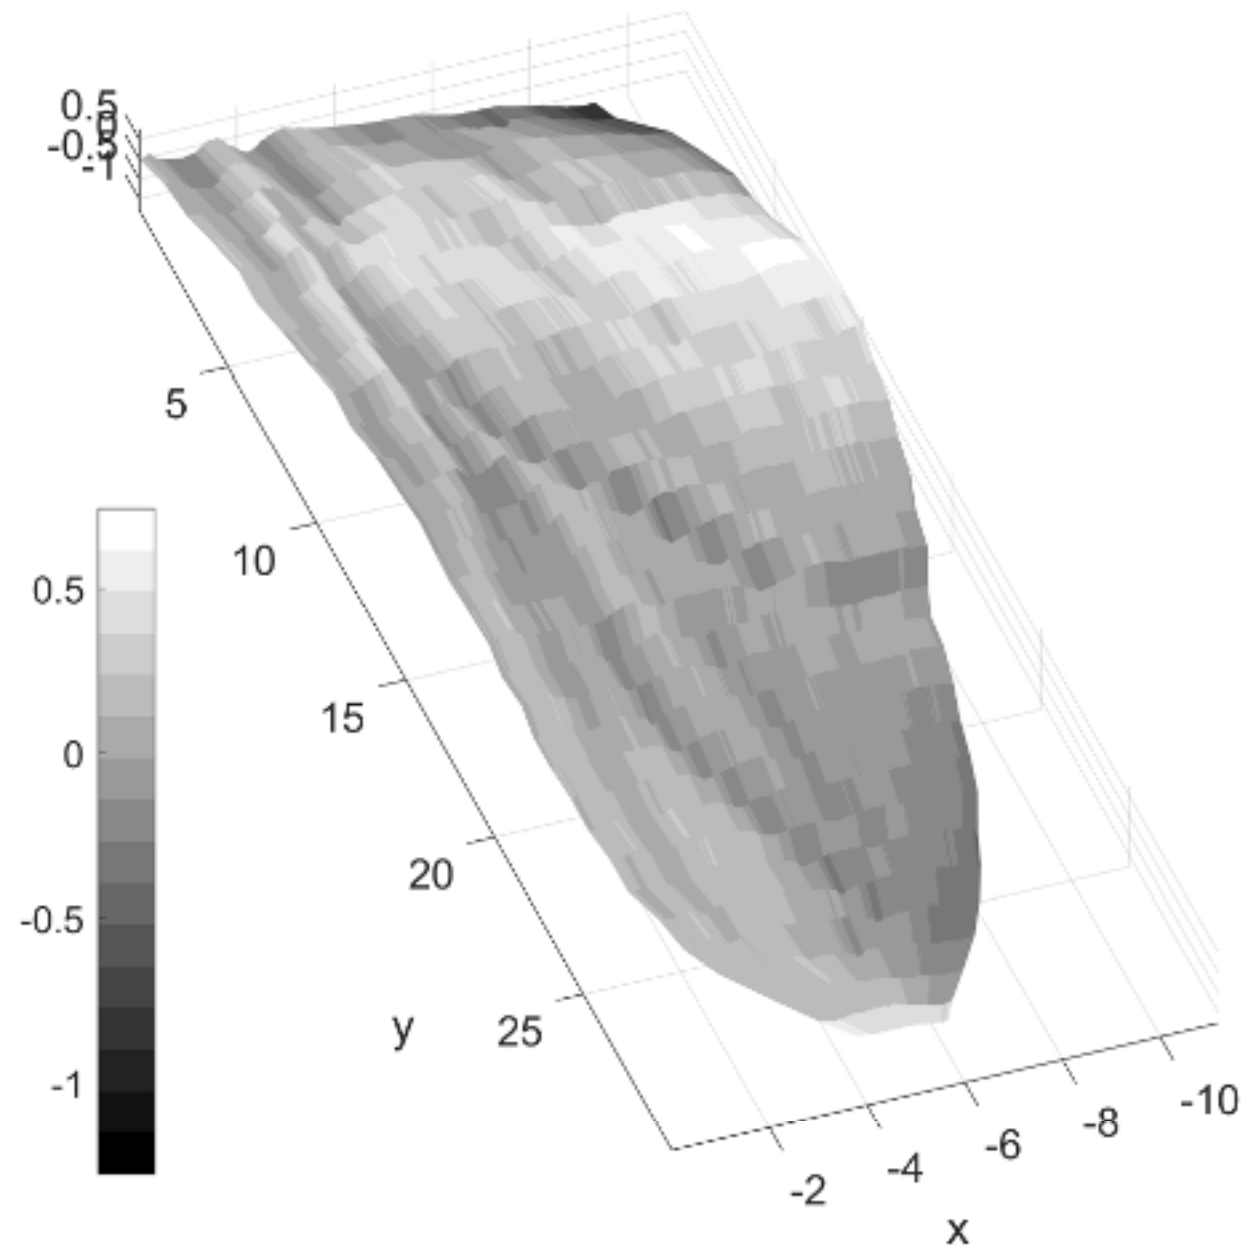

# Cordulia aenea-M1-museum

## Forewing

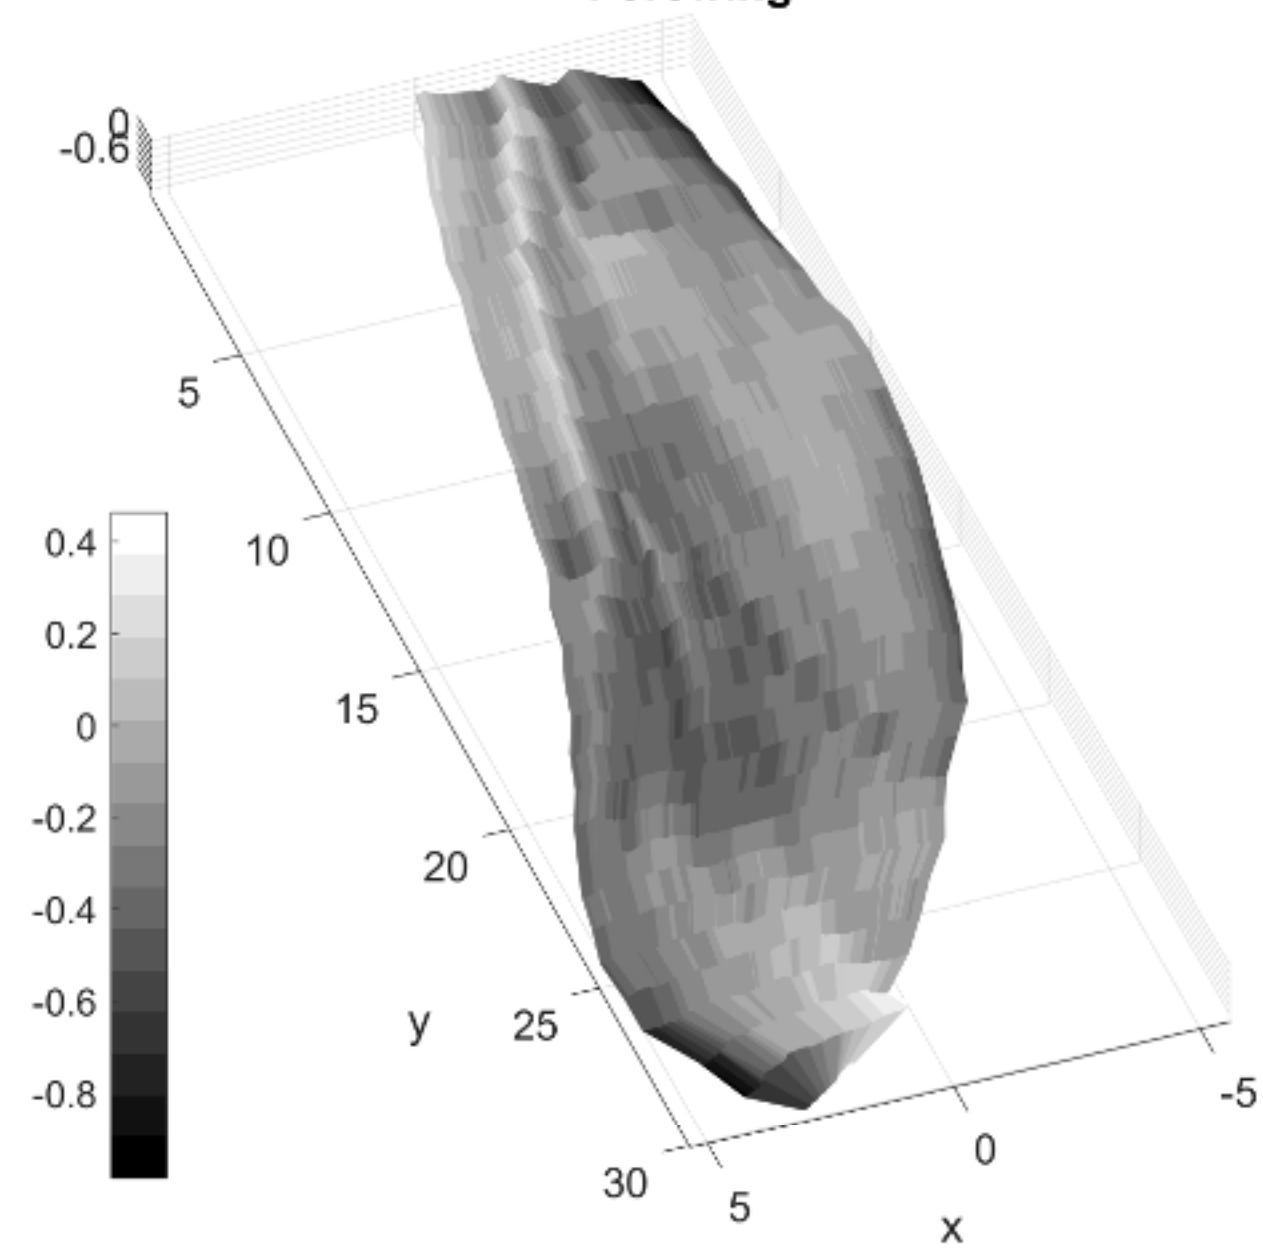

## Hind wing

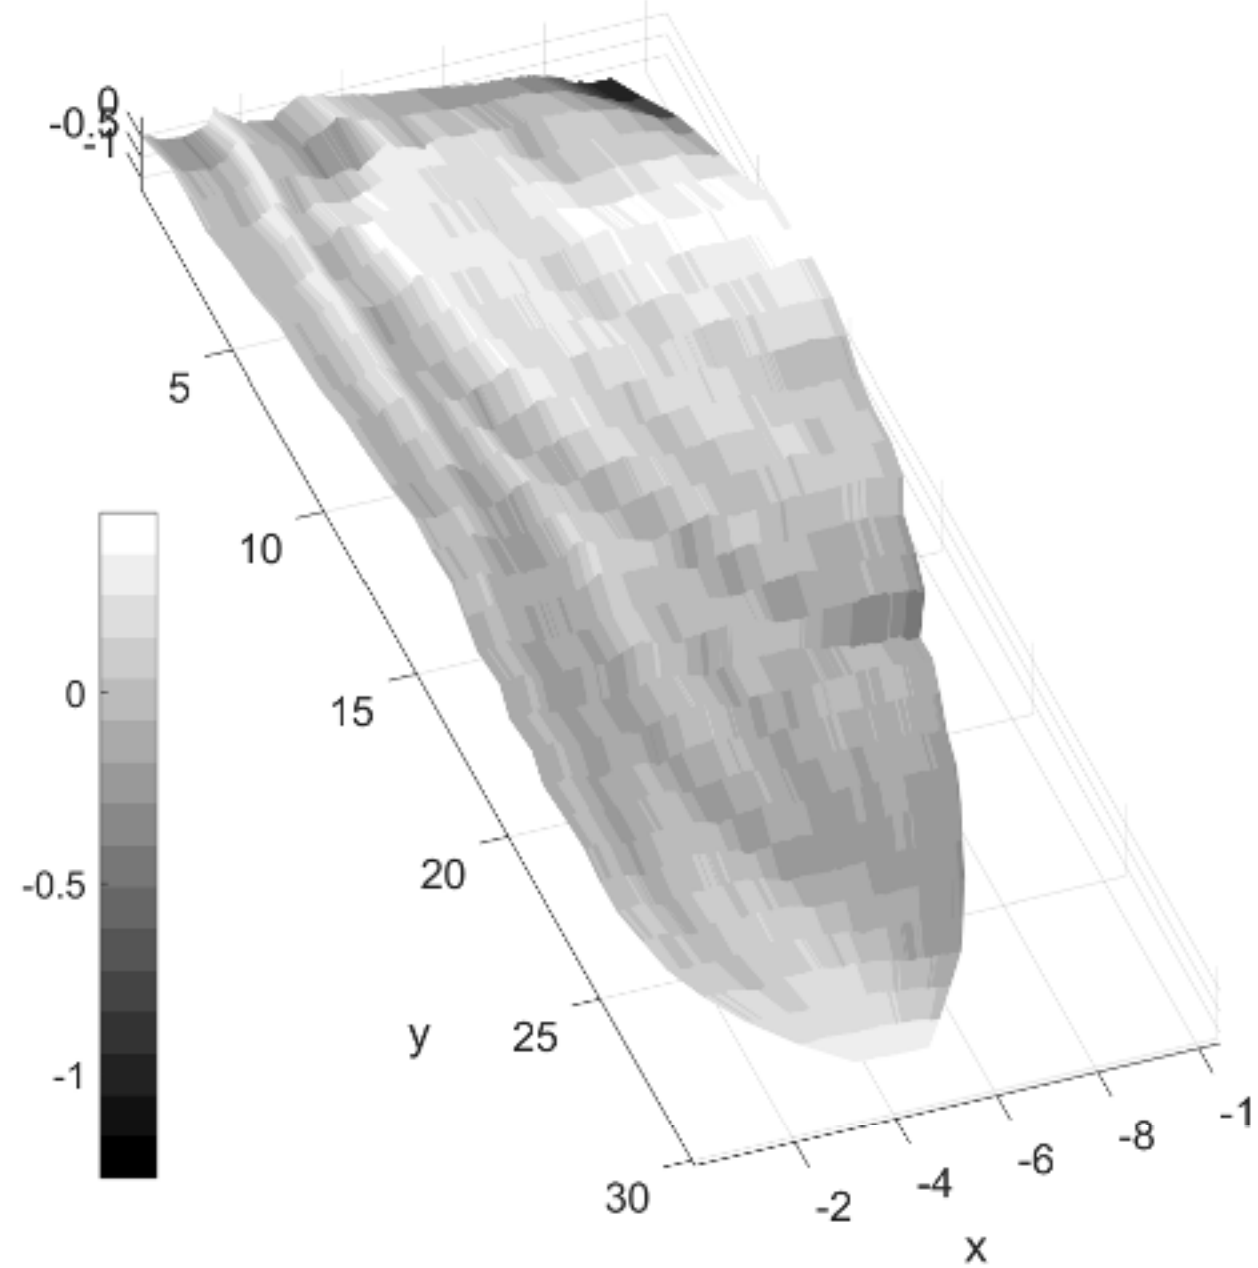

# Cordulia aenea-M2-museum

## Forewing

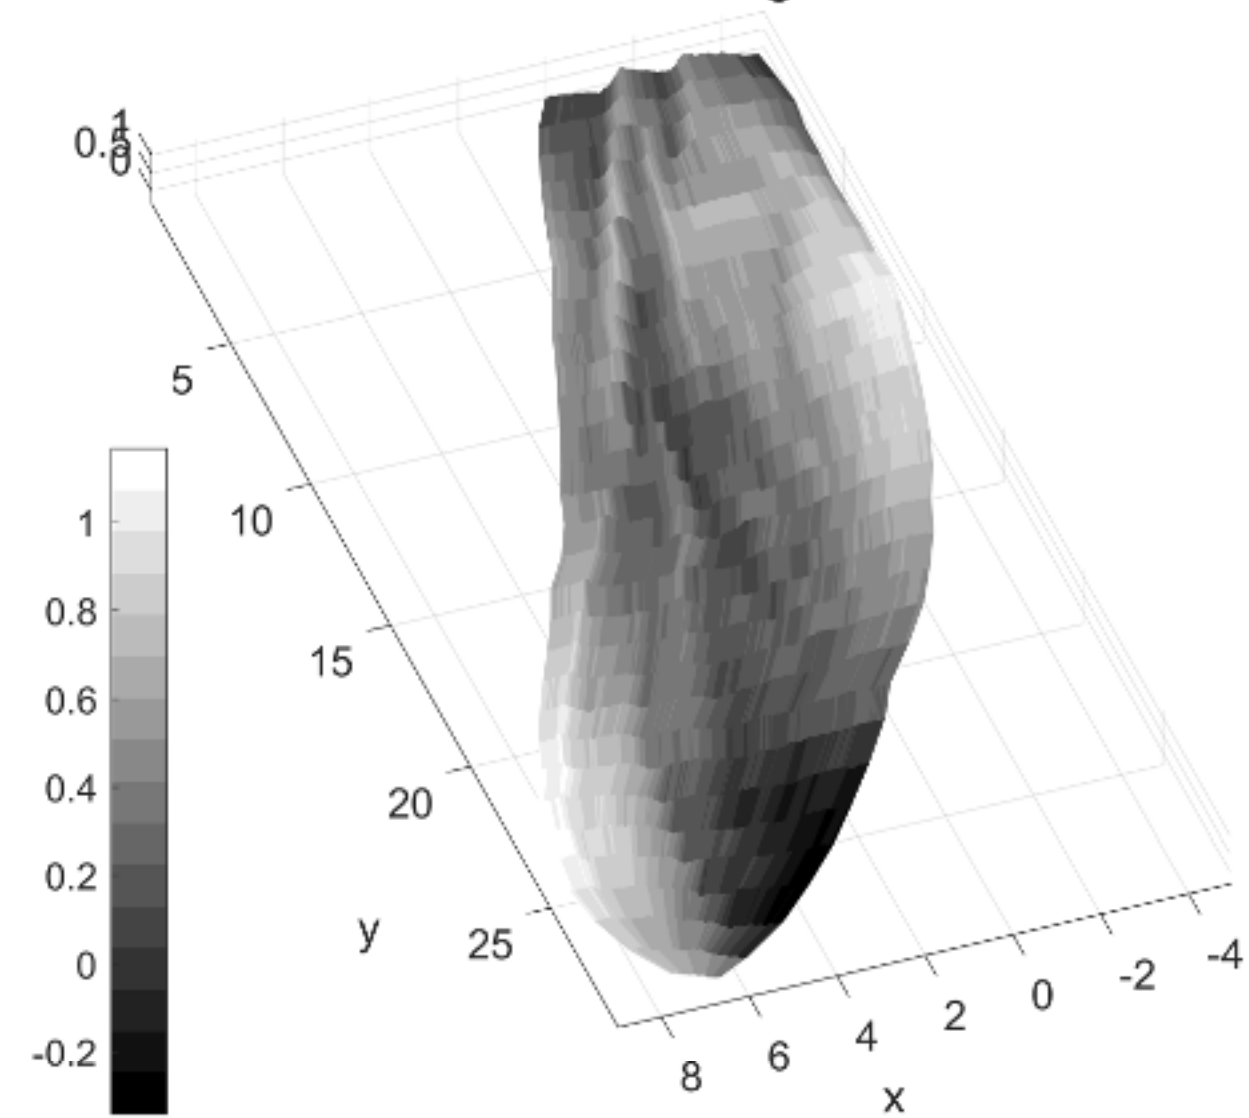

## Hind wing

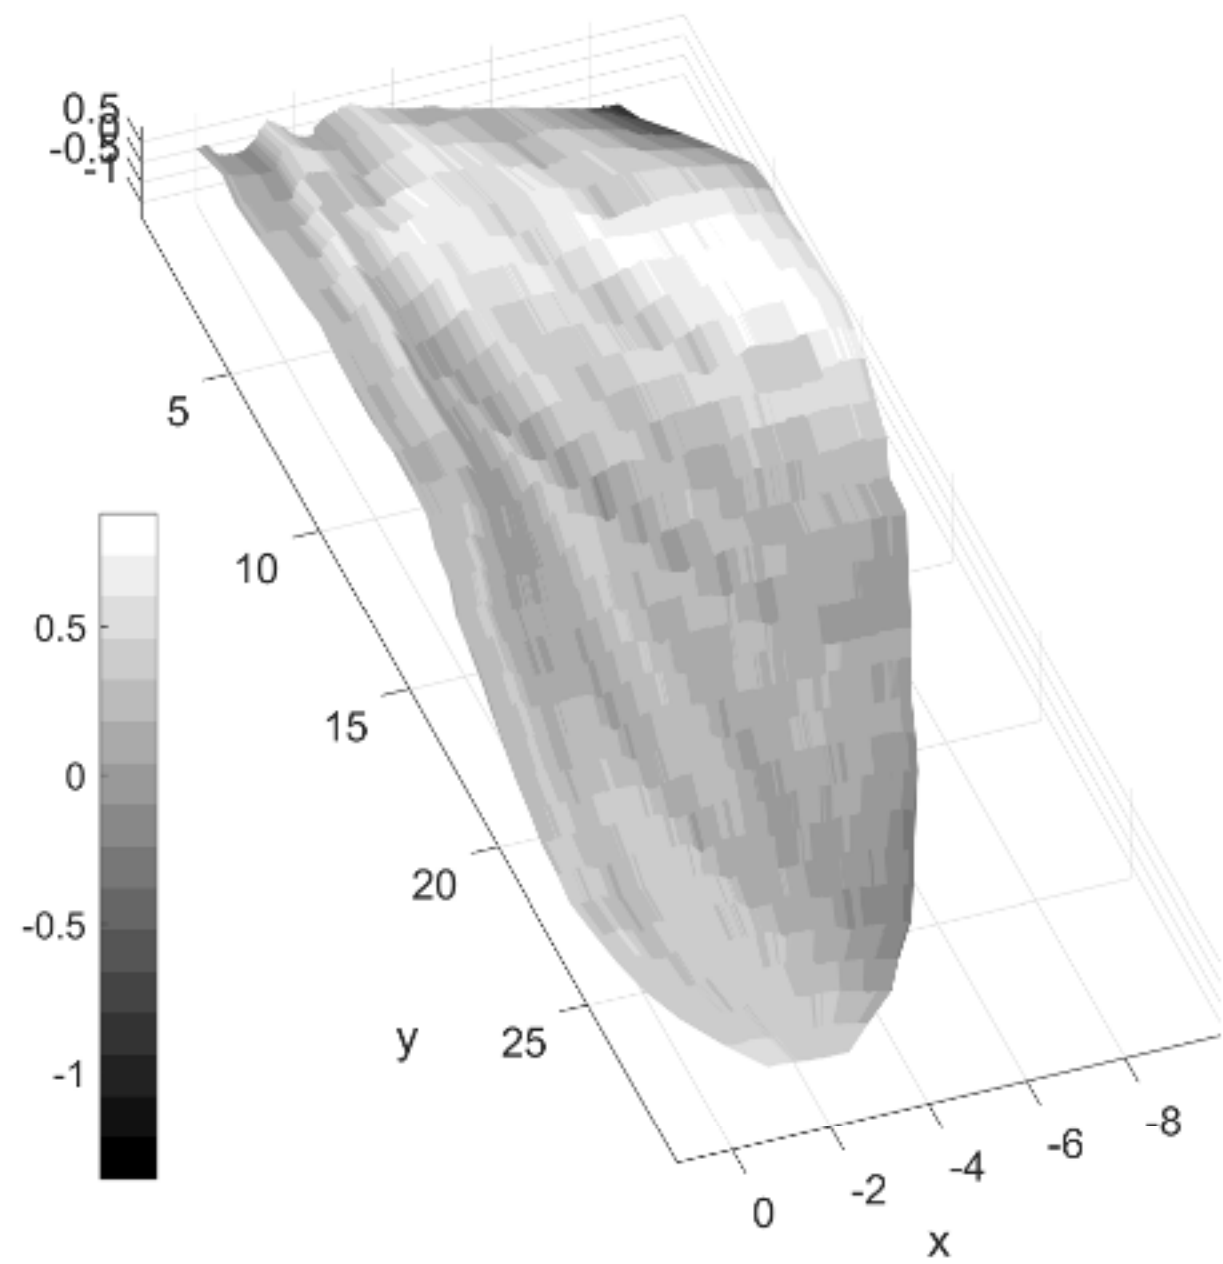

# Cordulia aenea-M3-museum

## Forewing

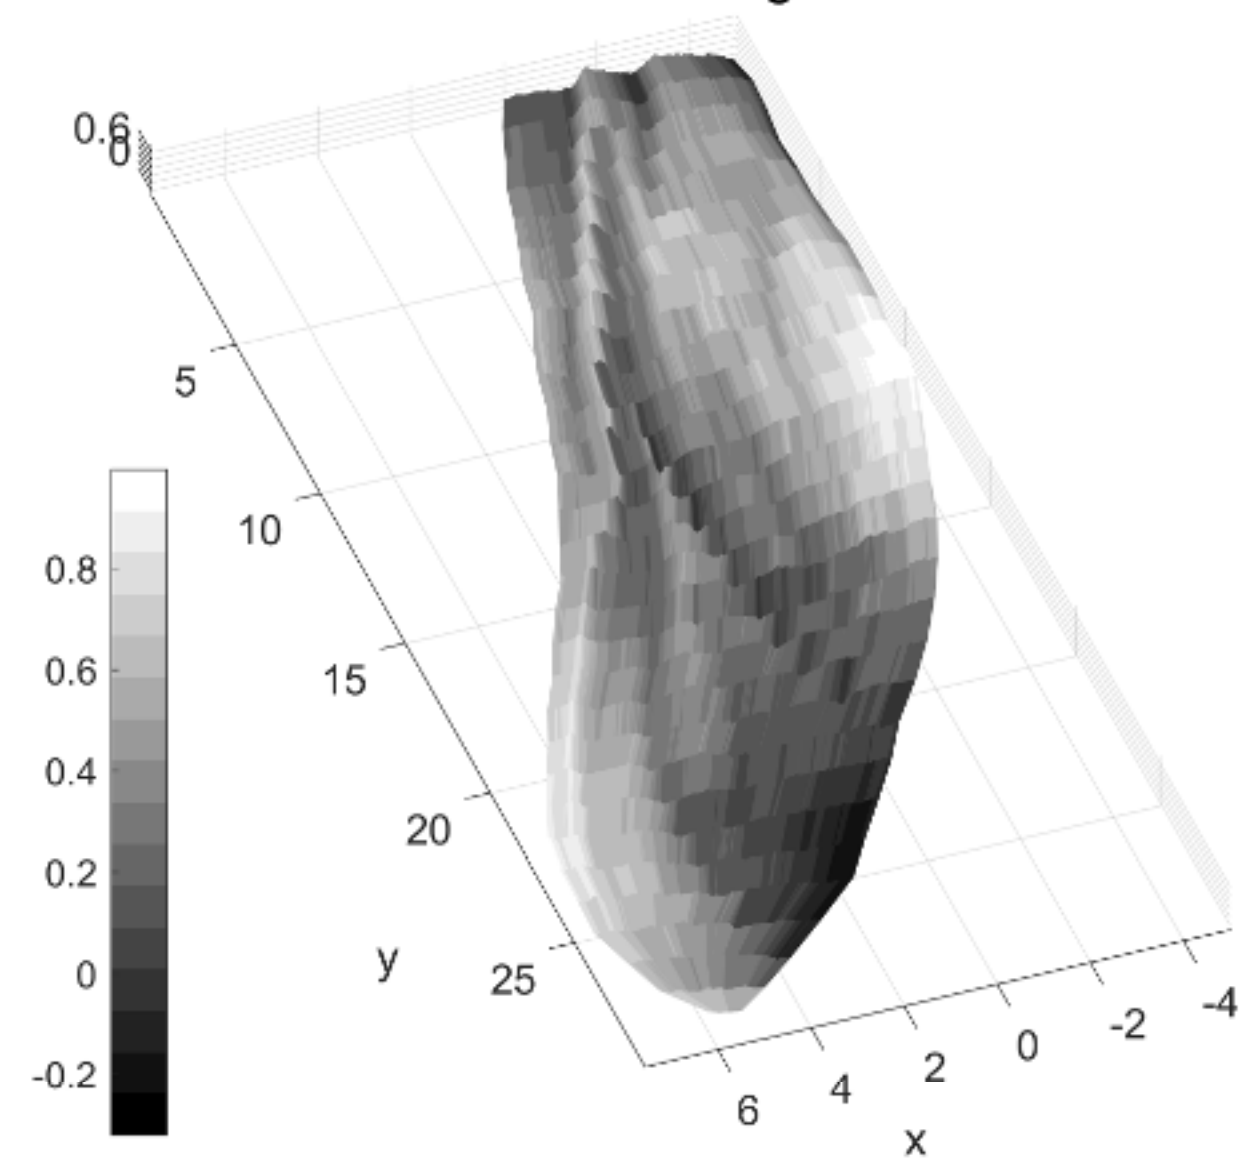

## Hind wing

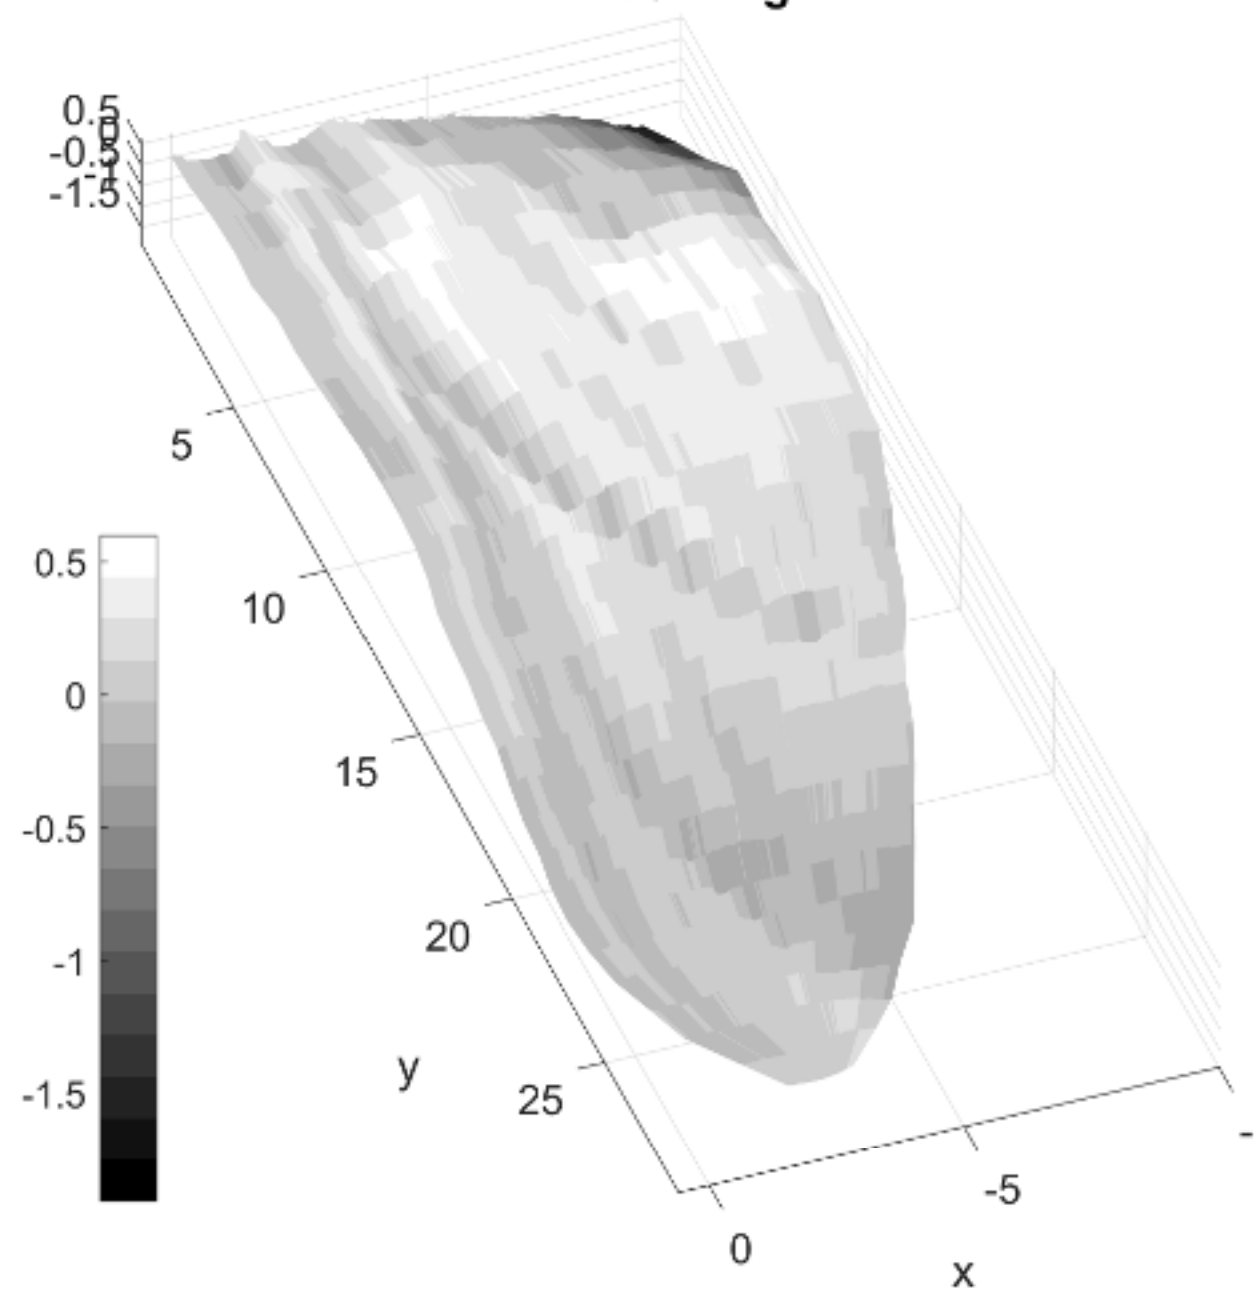

# Hemianax ephippiger-F1-museum

## Forewing

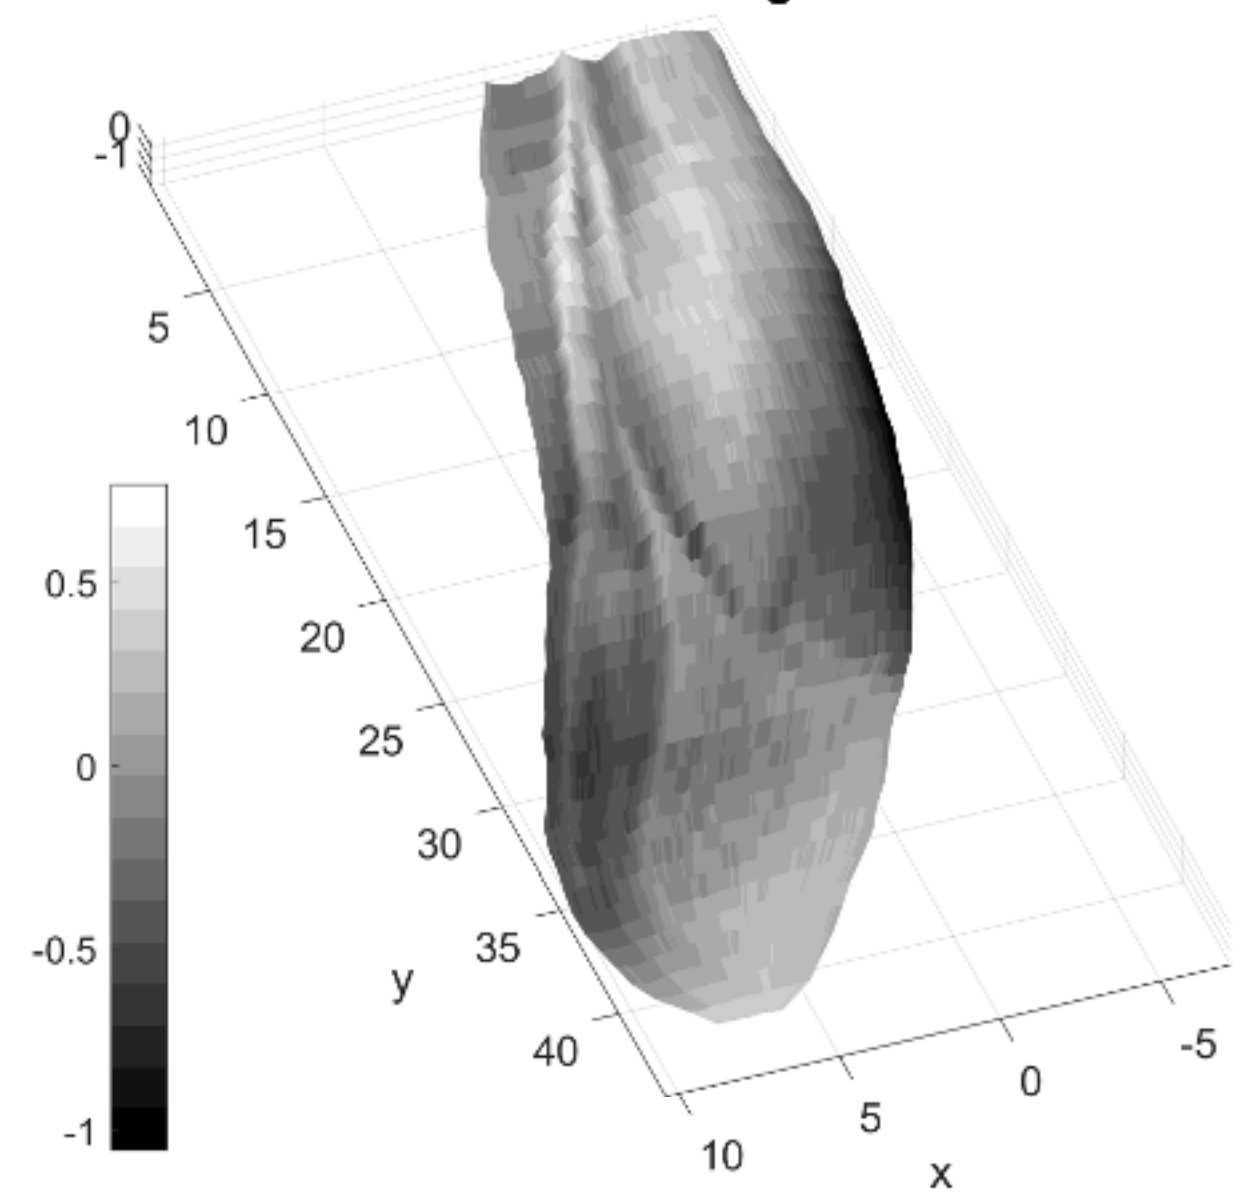

## Hind wing

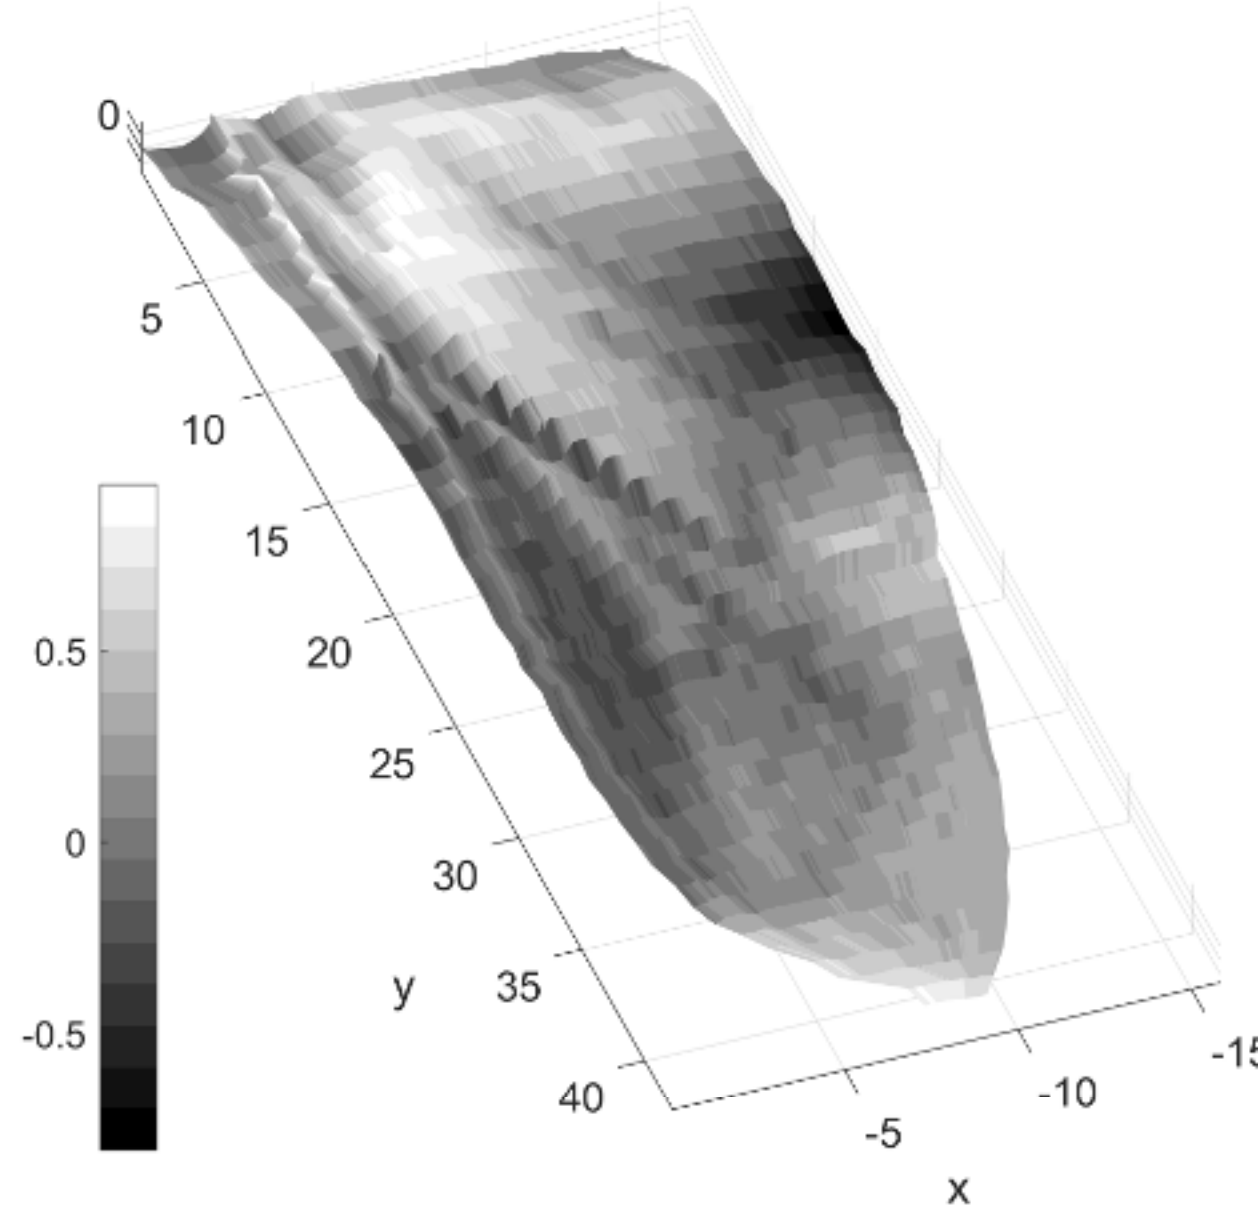

# Hemianax ephippiger-F2-museum

## Forewing

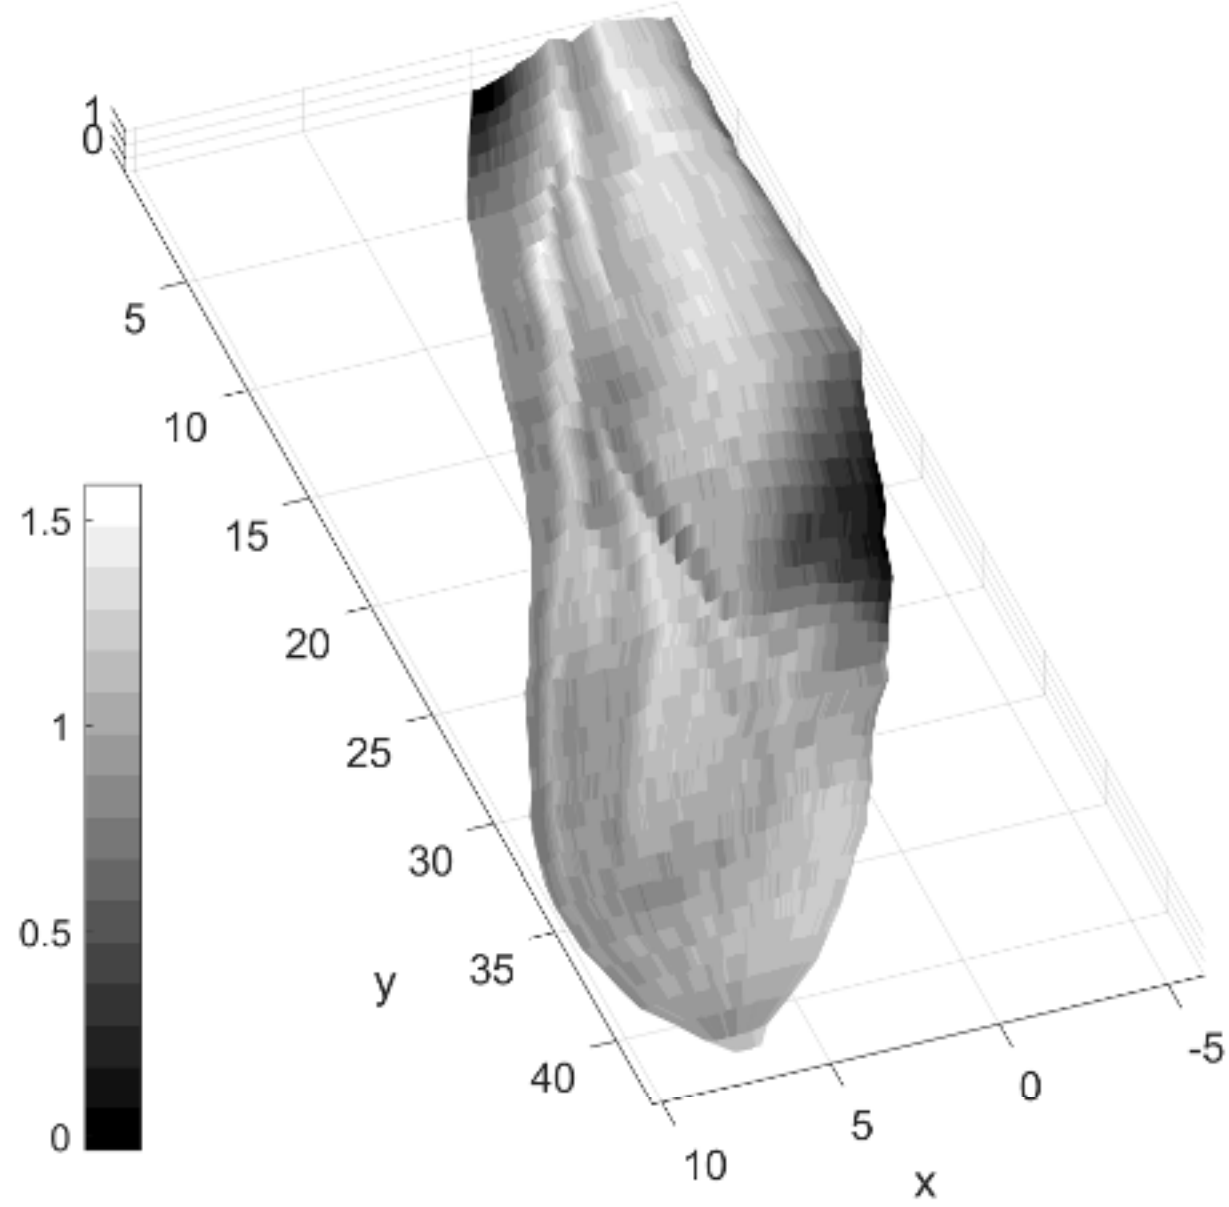

## Hind wing

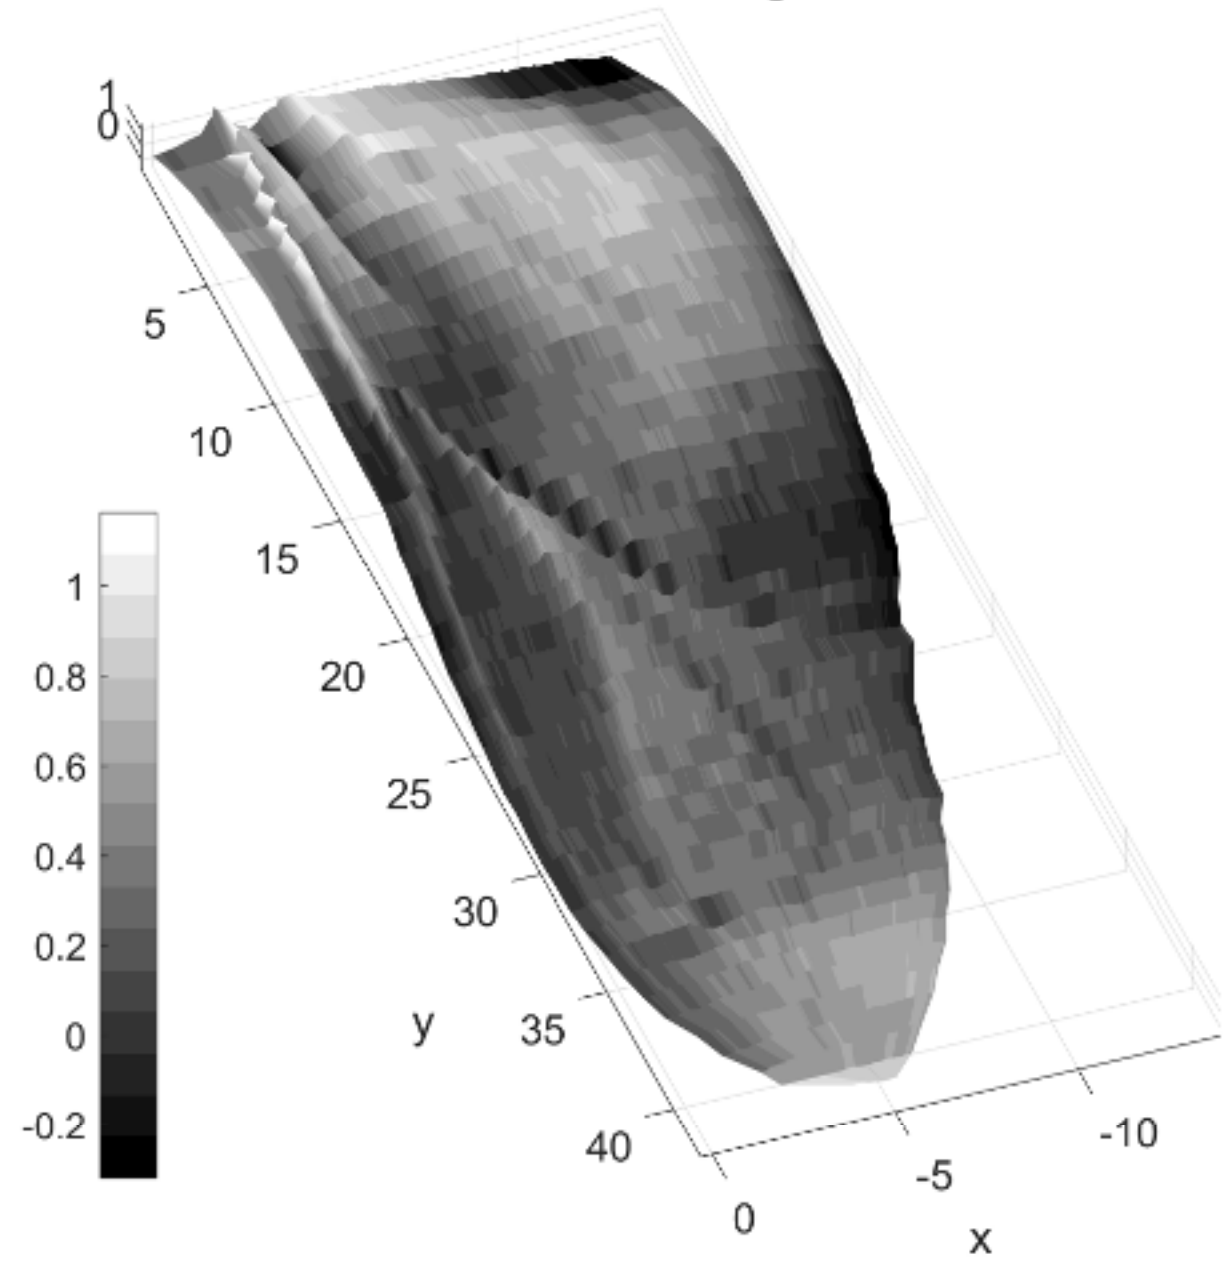

# Libellula pulchella-F1-museum

## Forewing

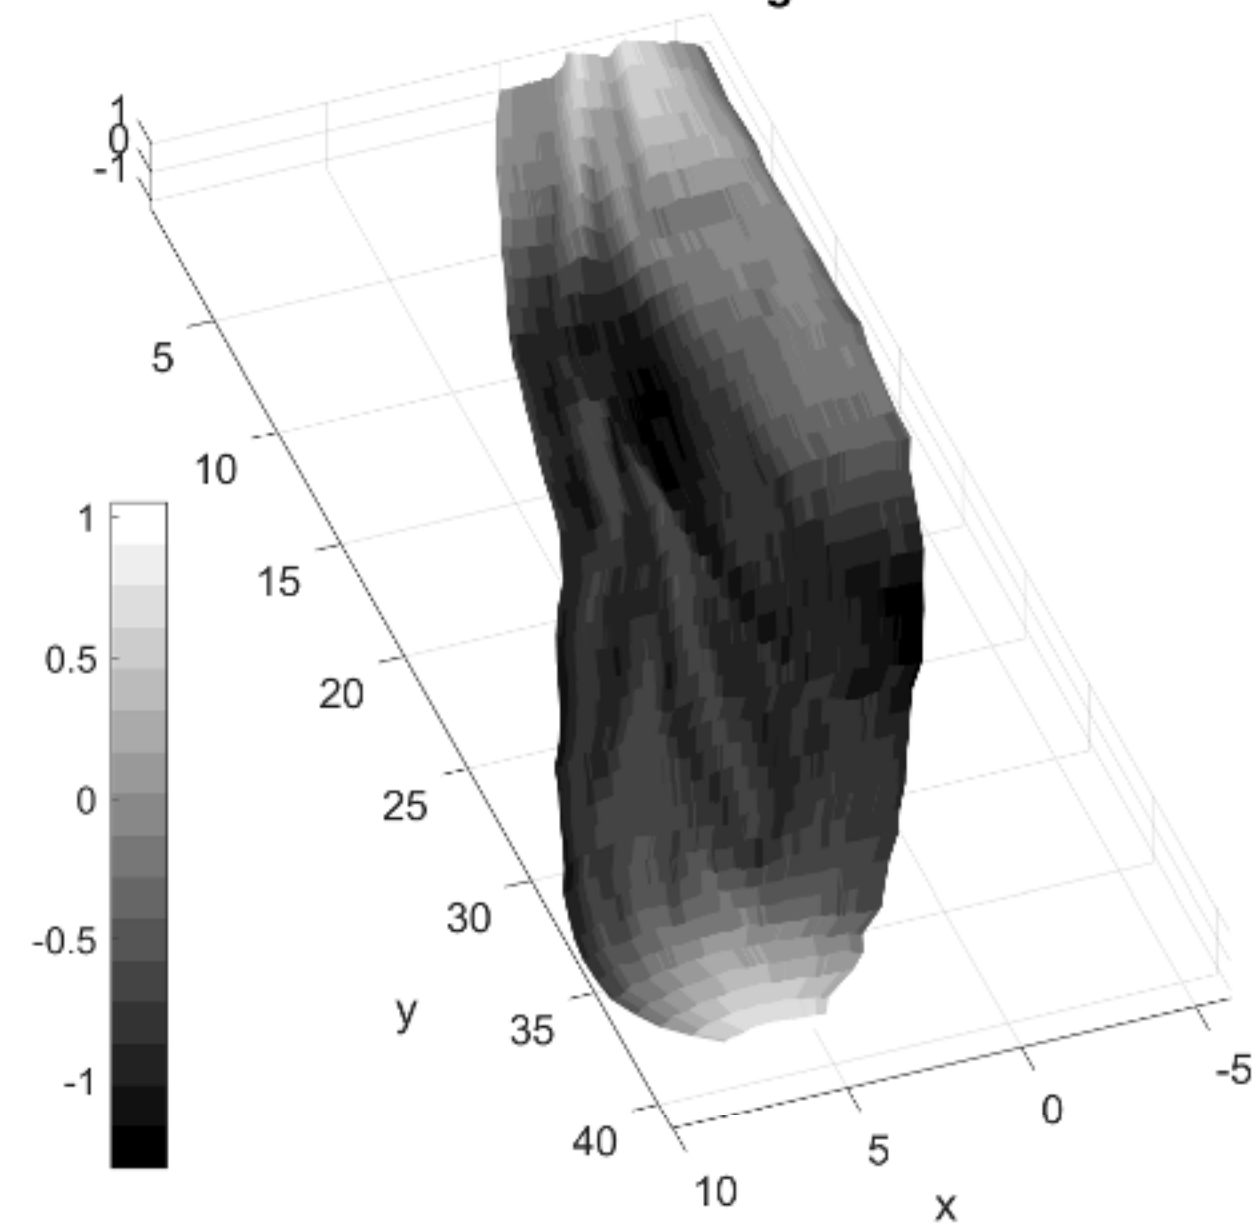

## Hind wing

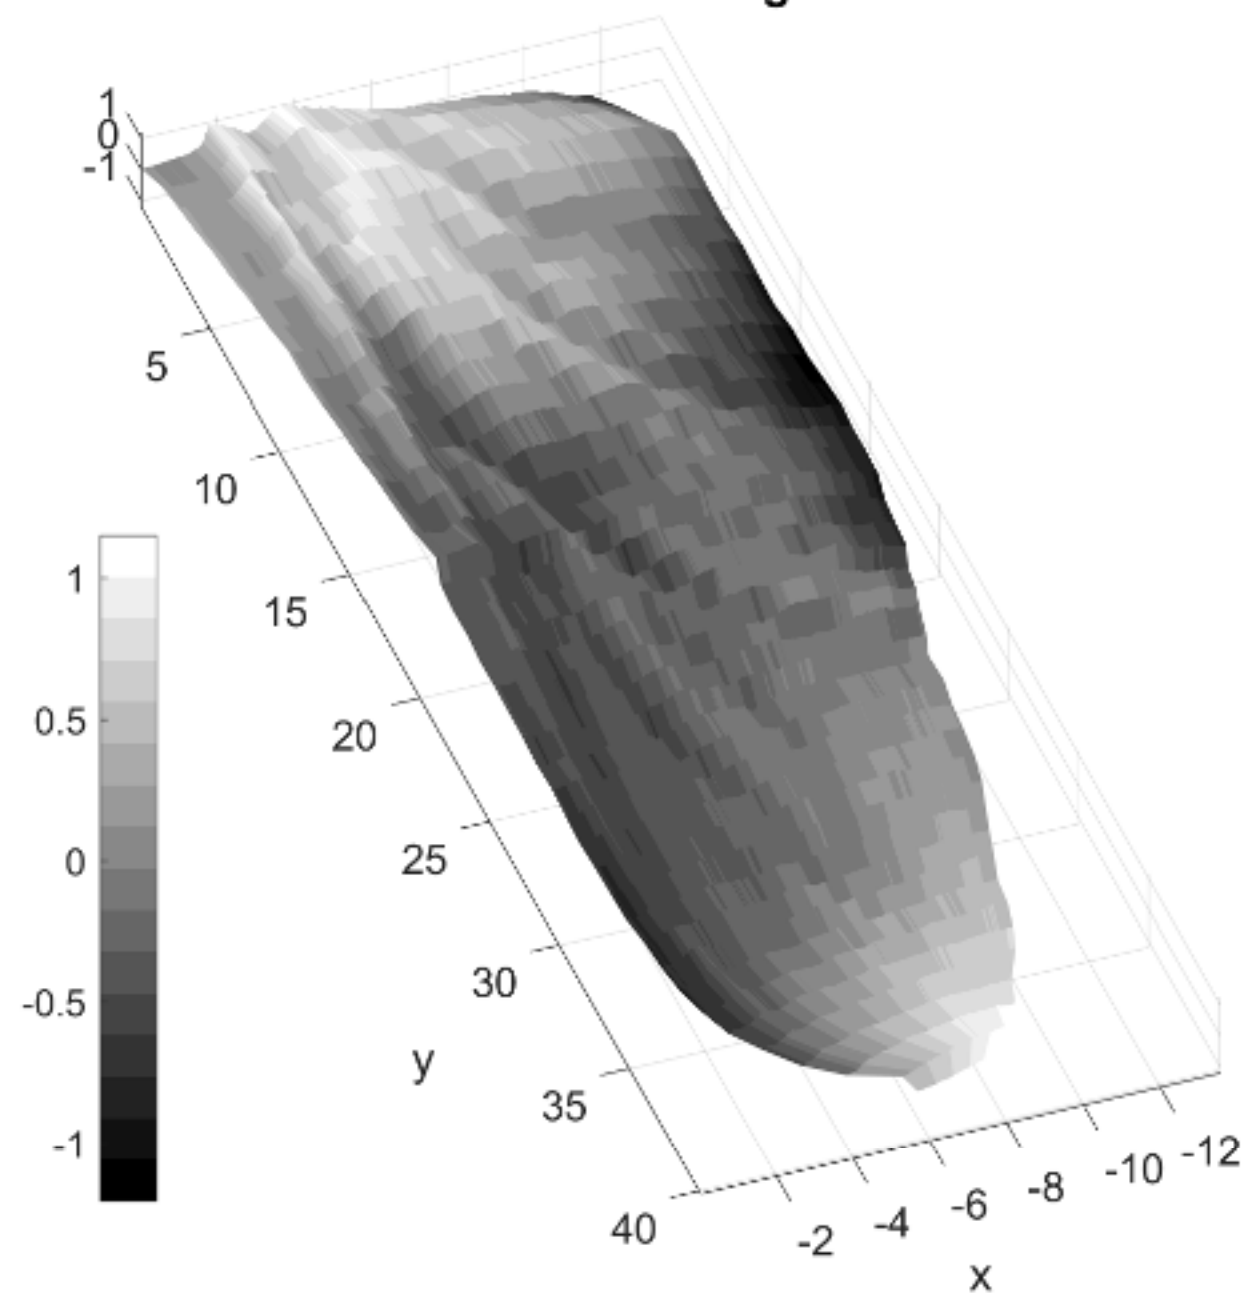



# Libellula pulchella-M1-museum

## Forewing

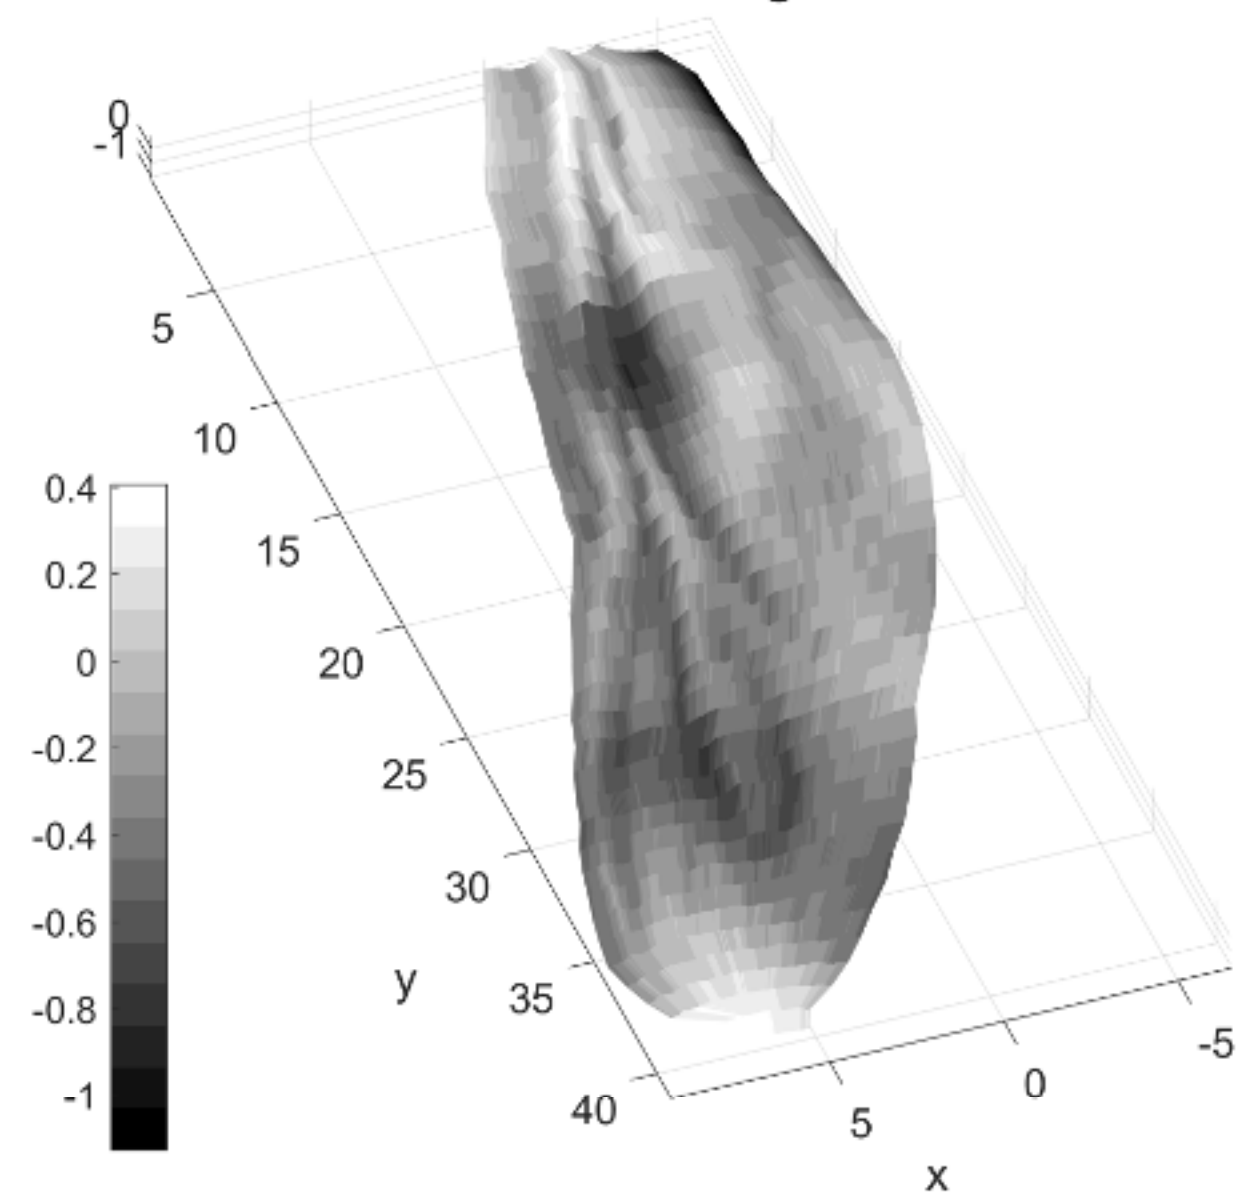

## Hind wing

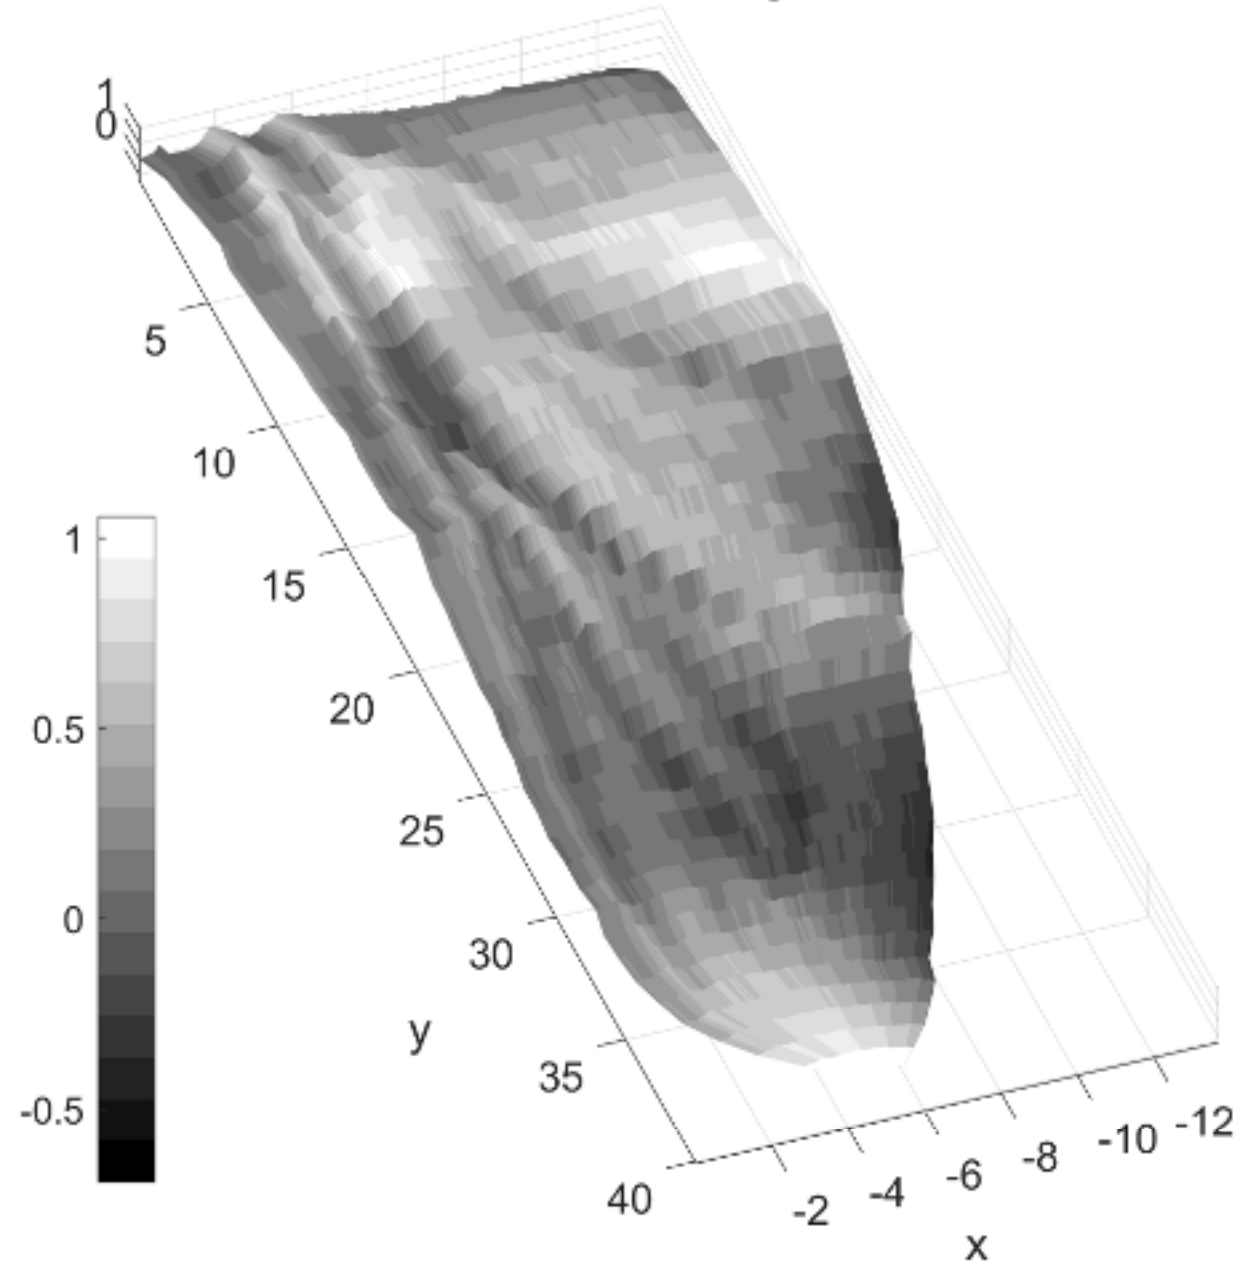

# Libellula pulchella-M2-museum

## Forewing

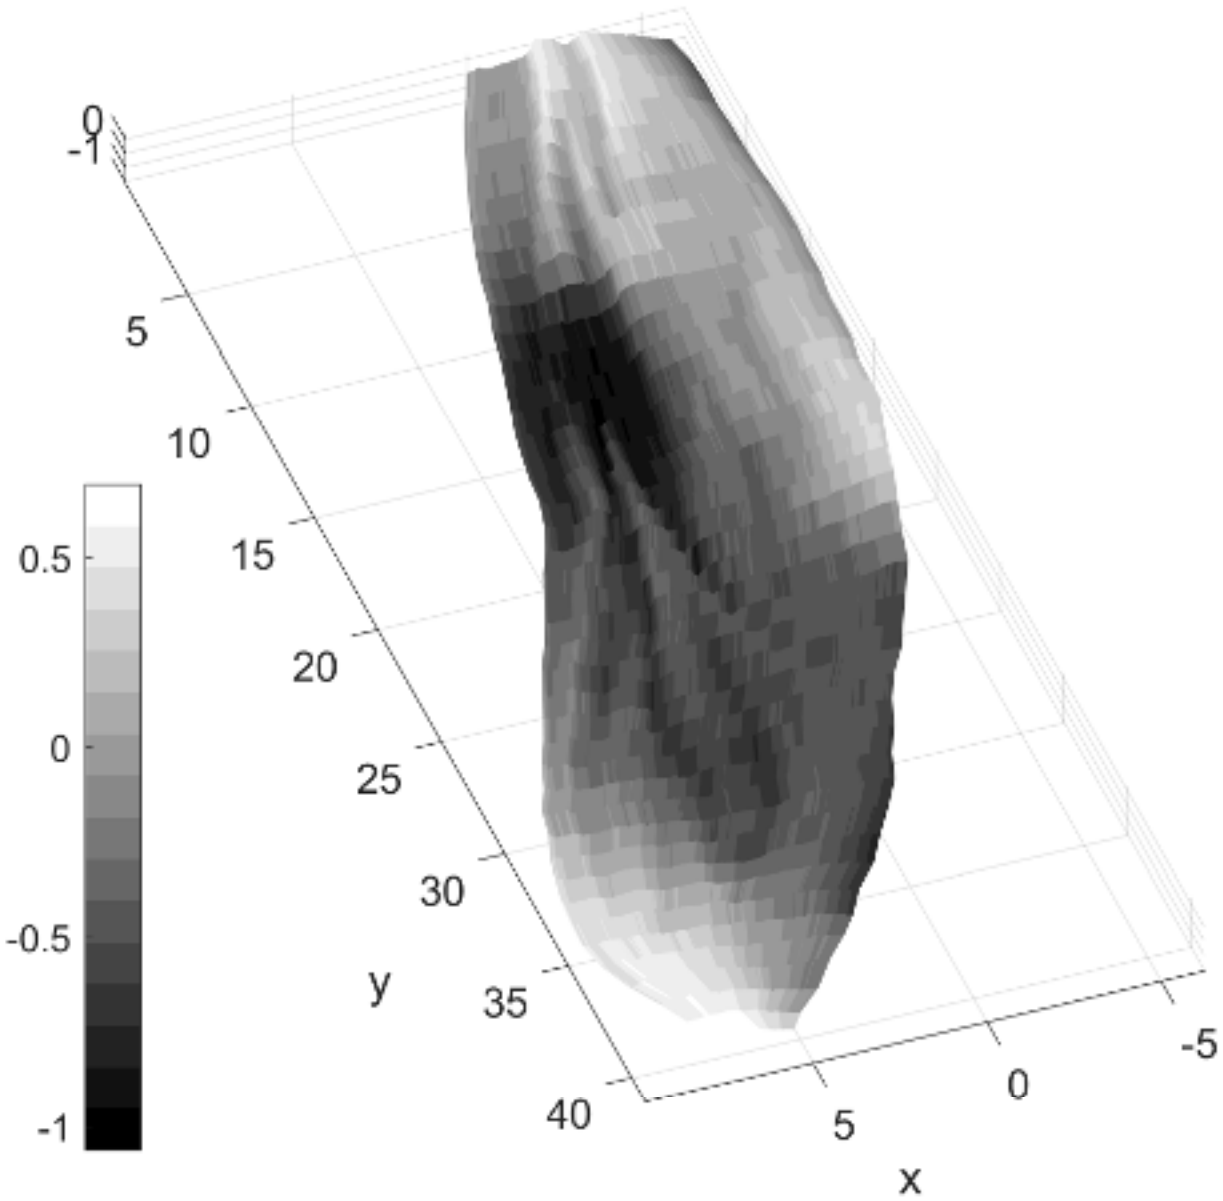

## Hind wing

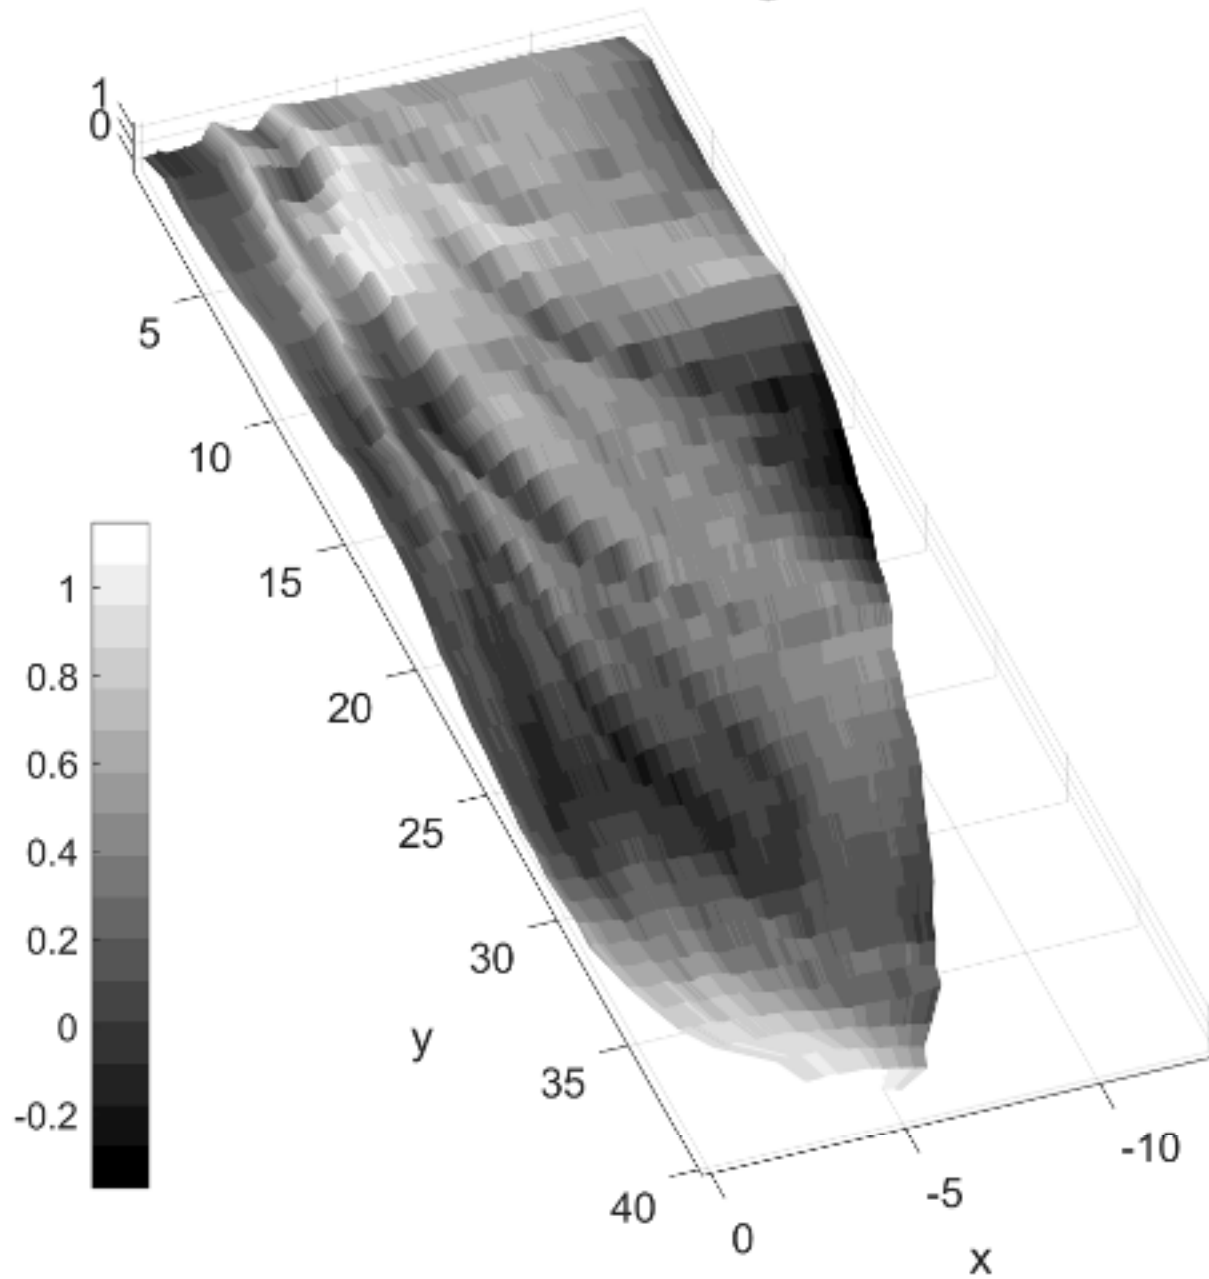

# Libellula variegata-F1-museum

## Forewing

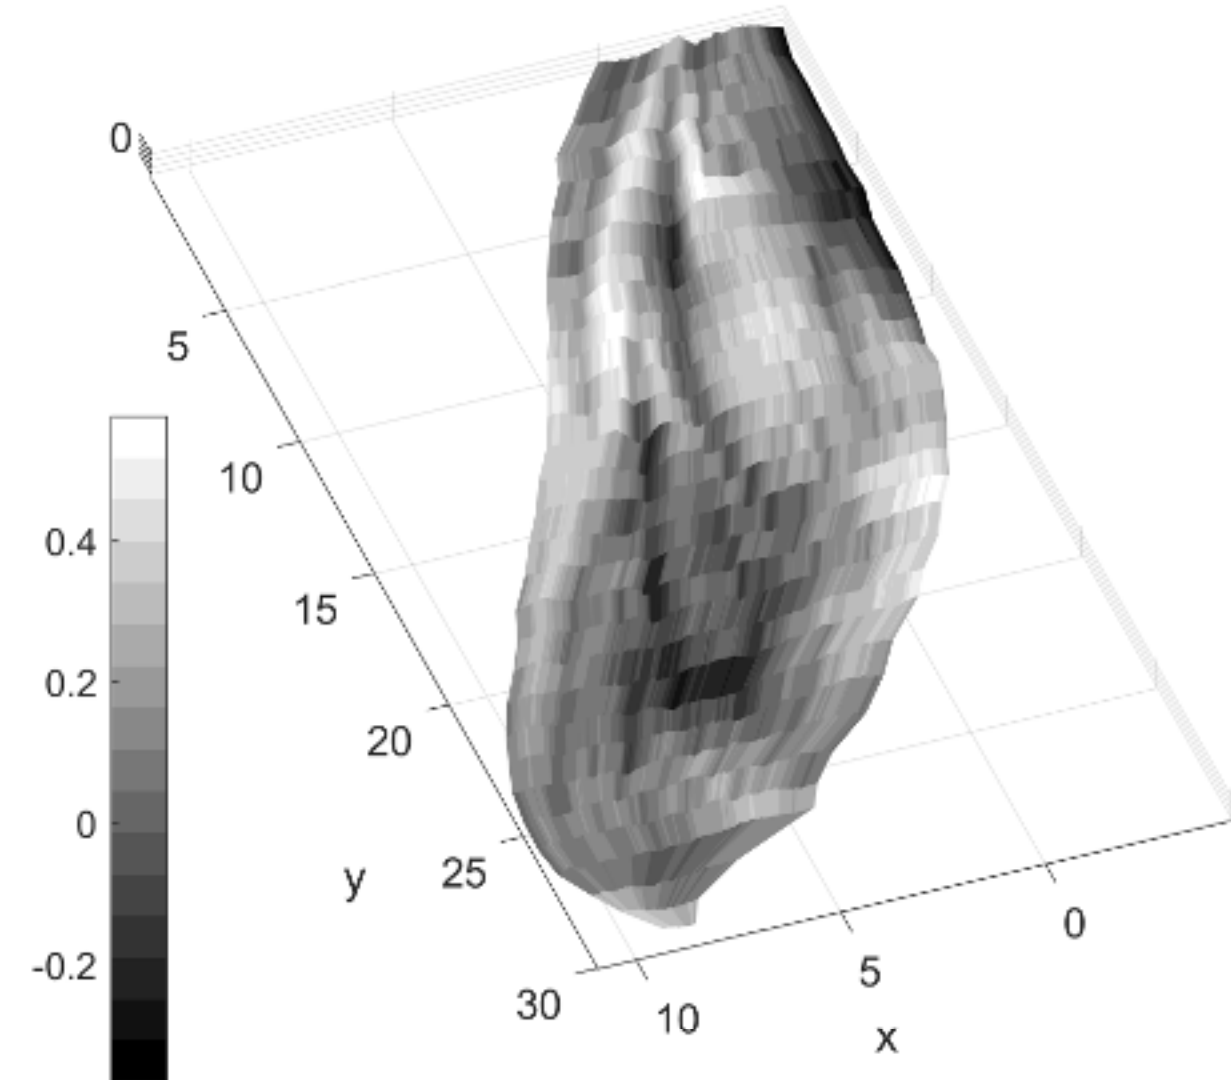

## Hind wing

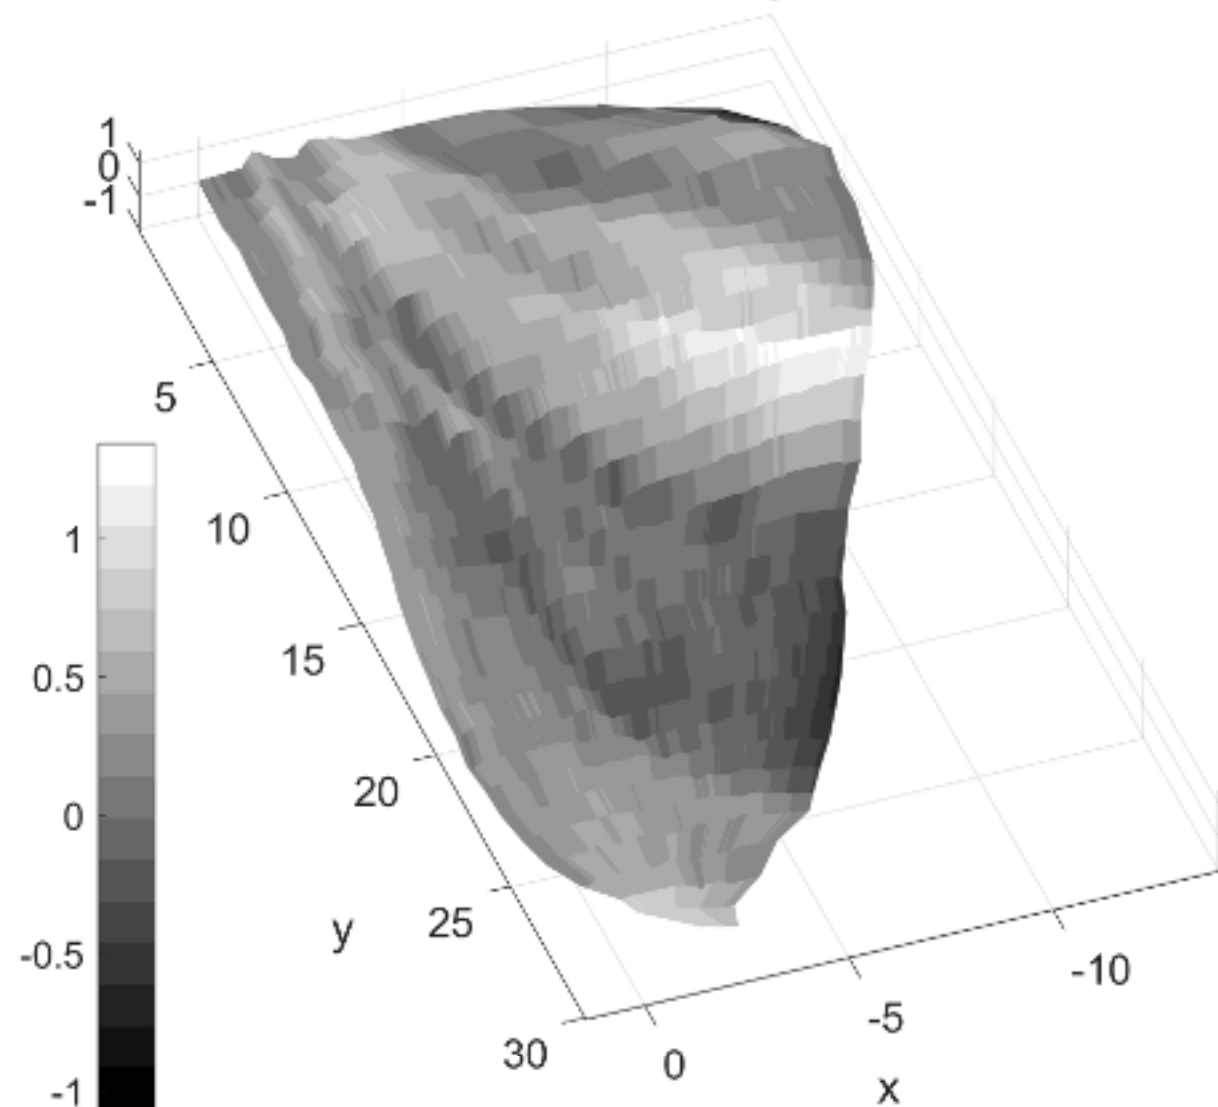

# Orthetrum cancellatum-F1-museum

## Forewing

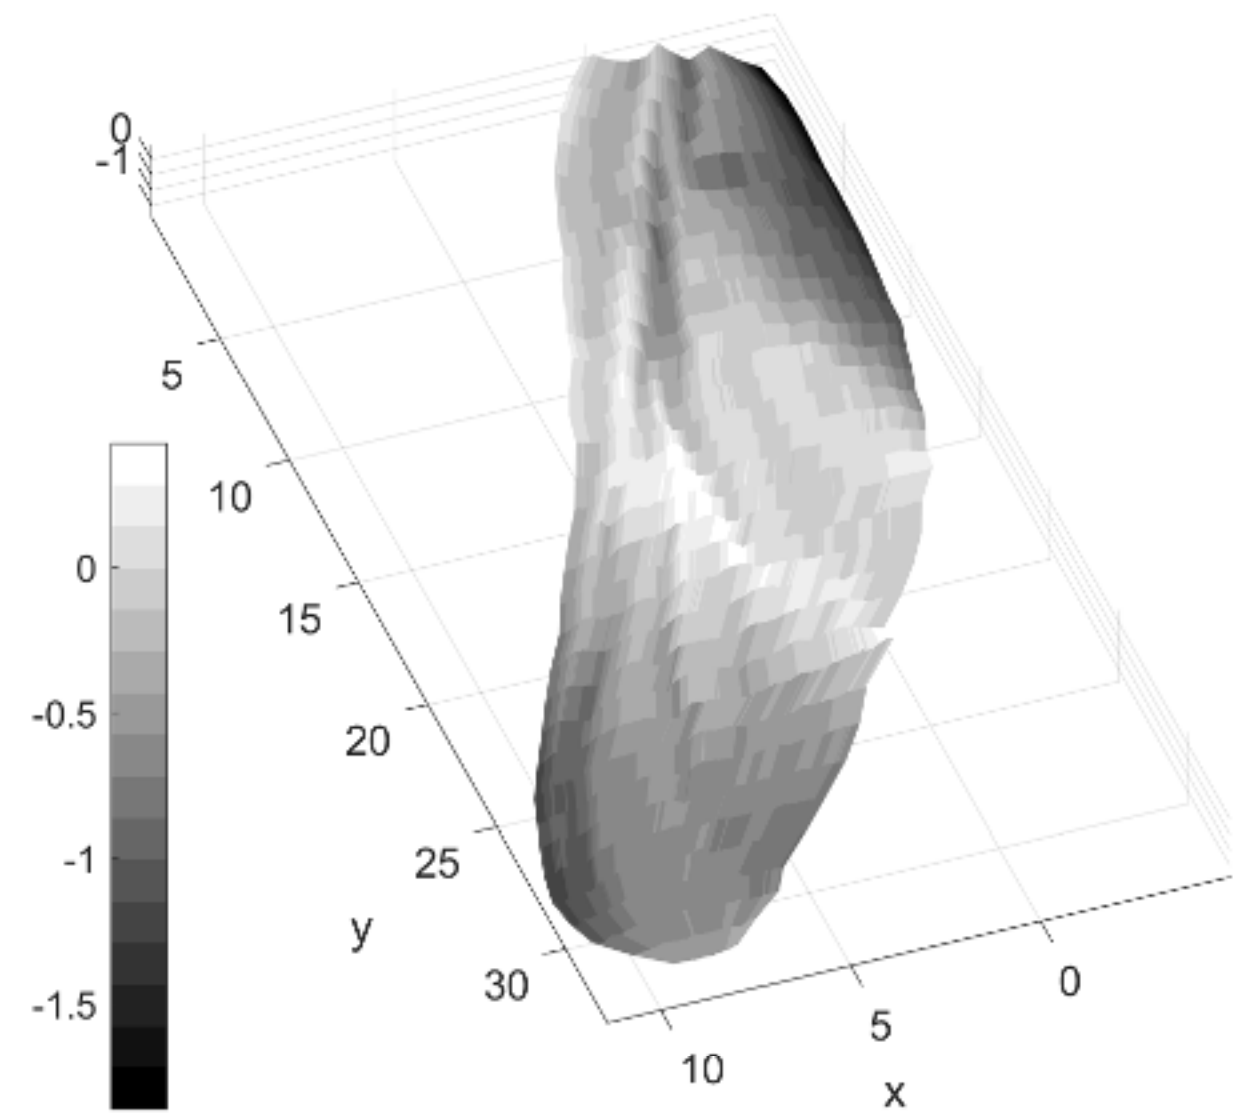

## Hind wing

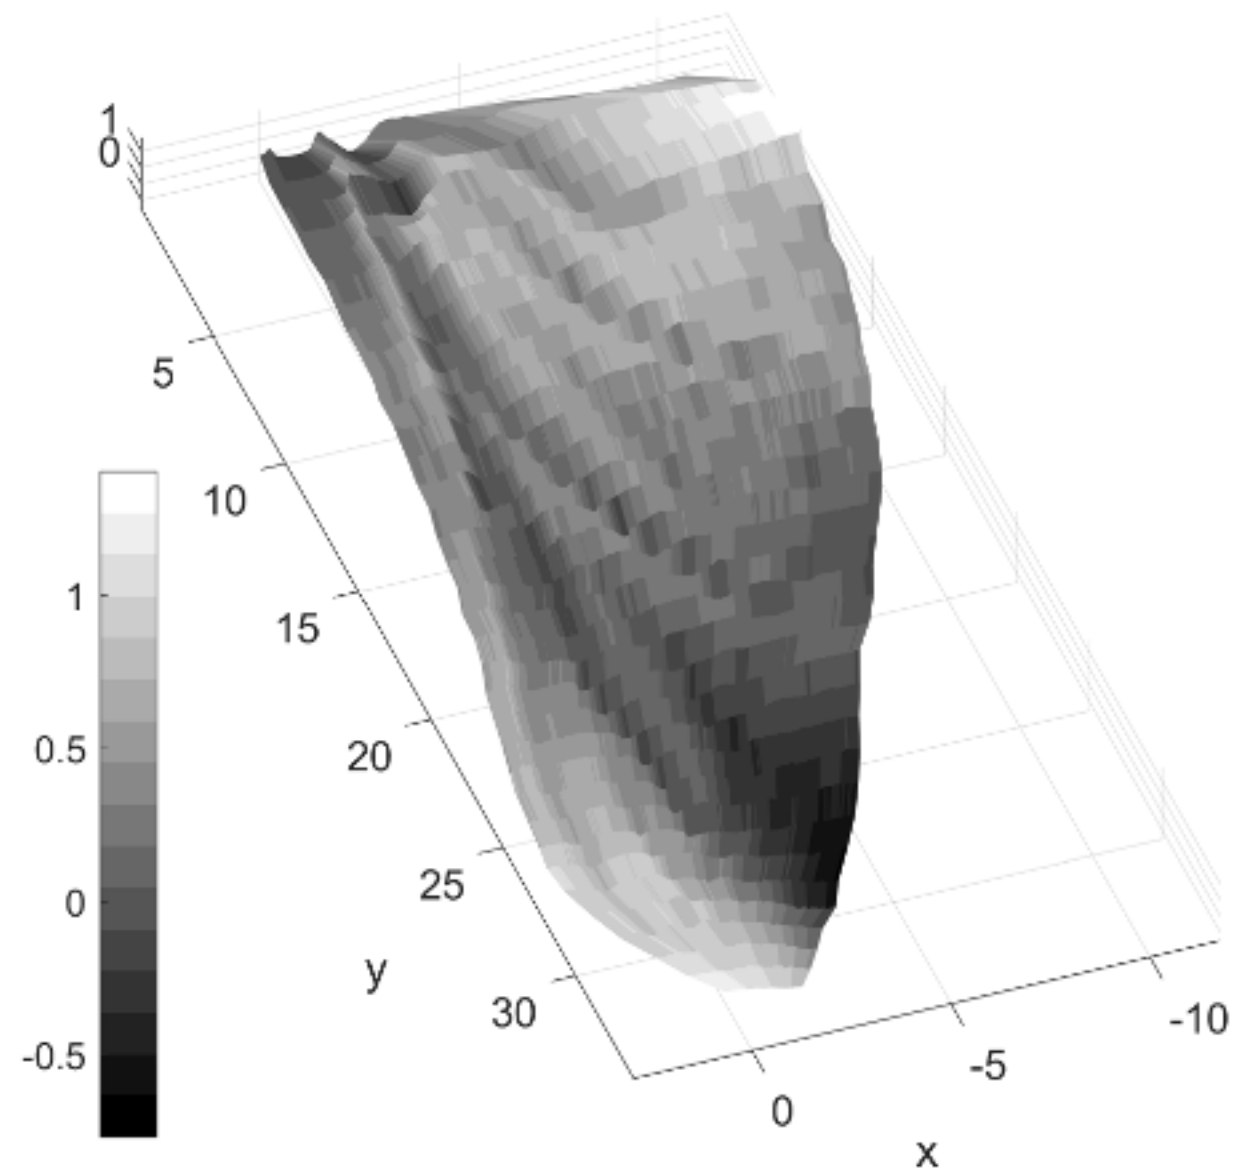

# Orthetrum cancellatum-F2-museum

## Forewing

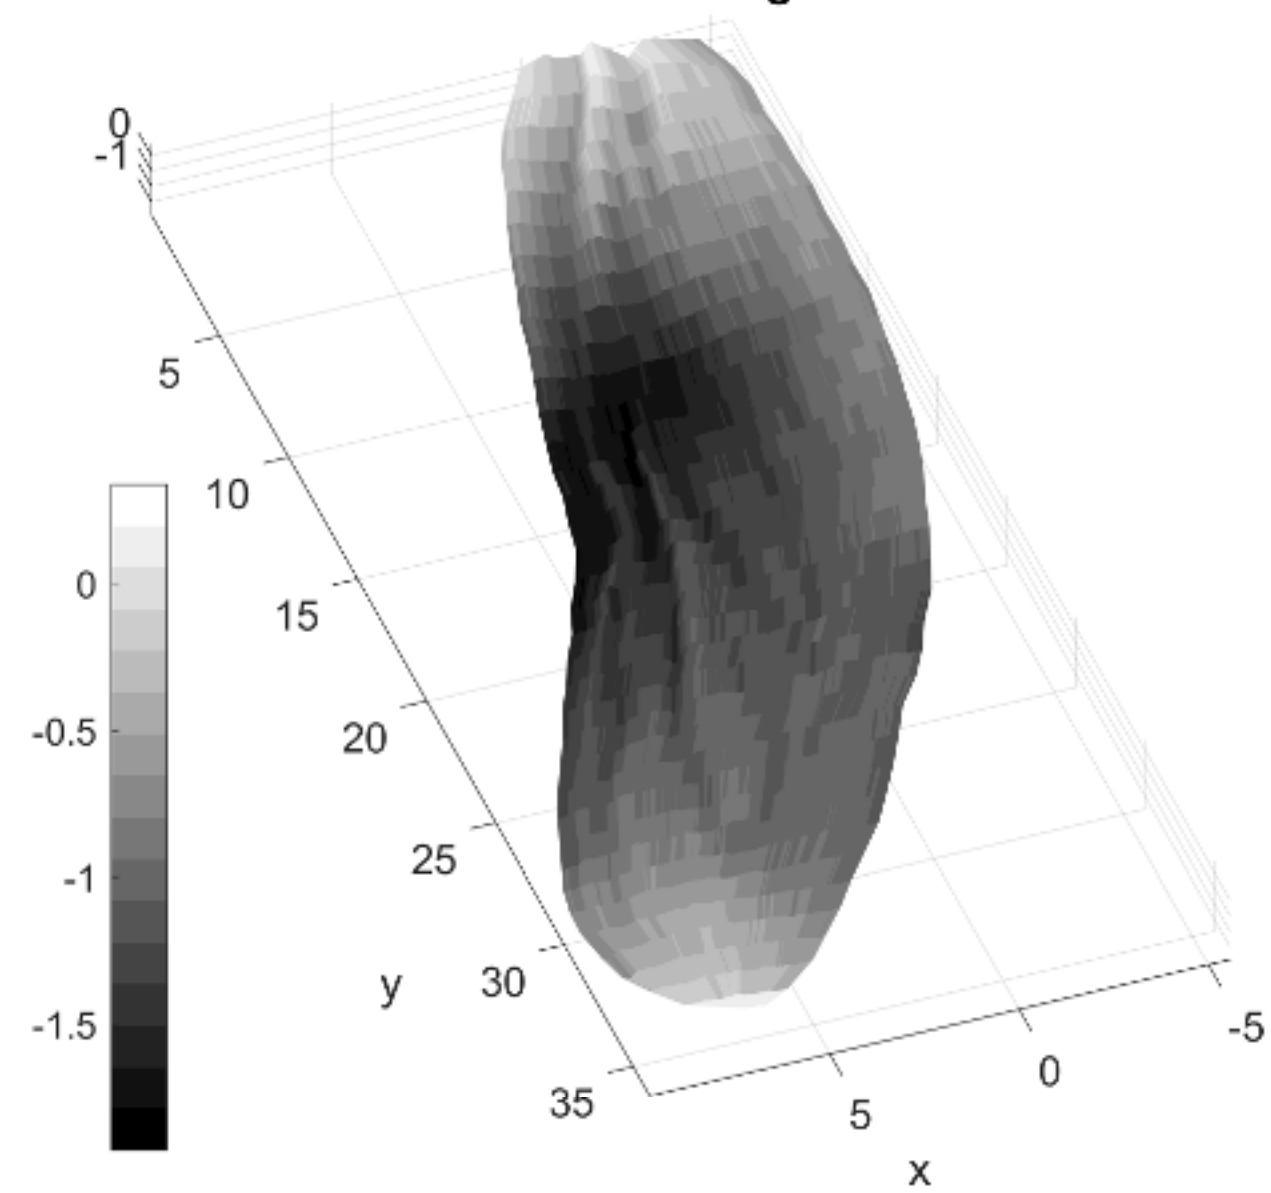

## Hind wing

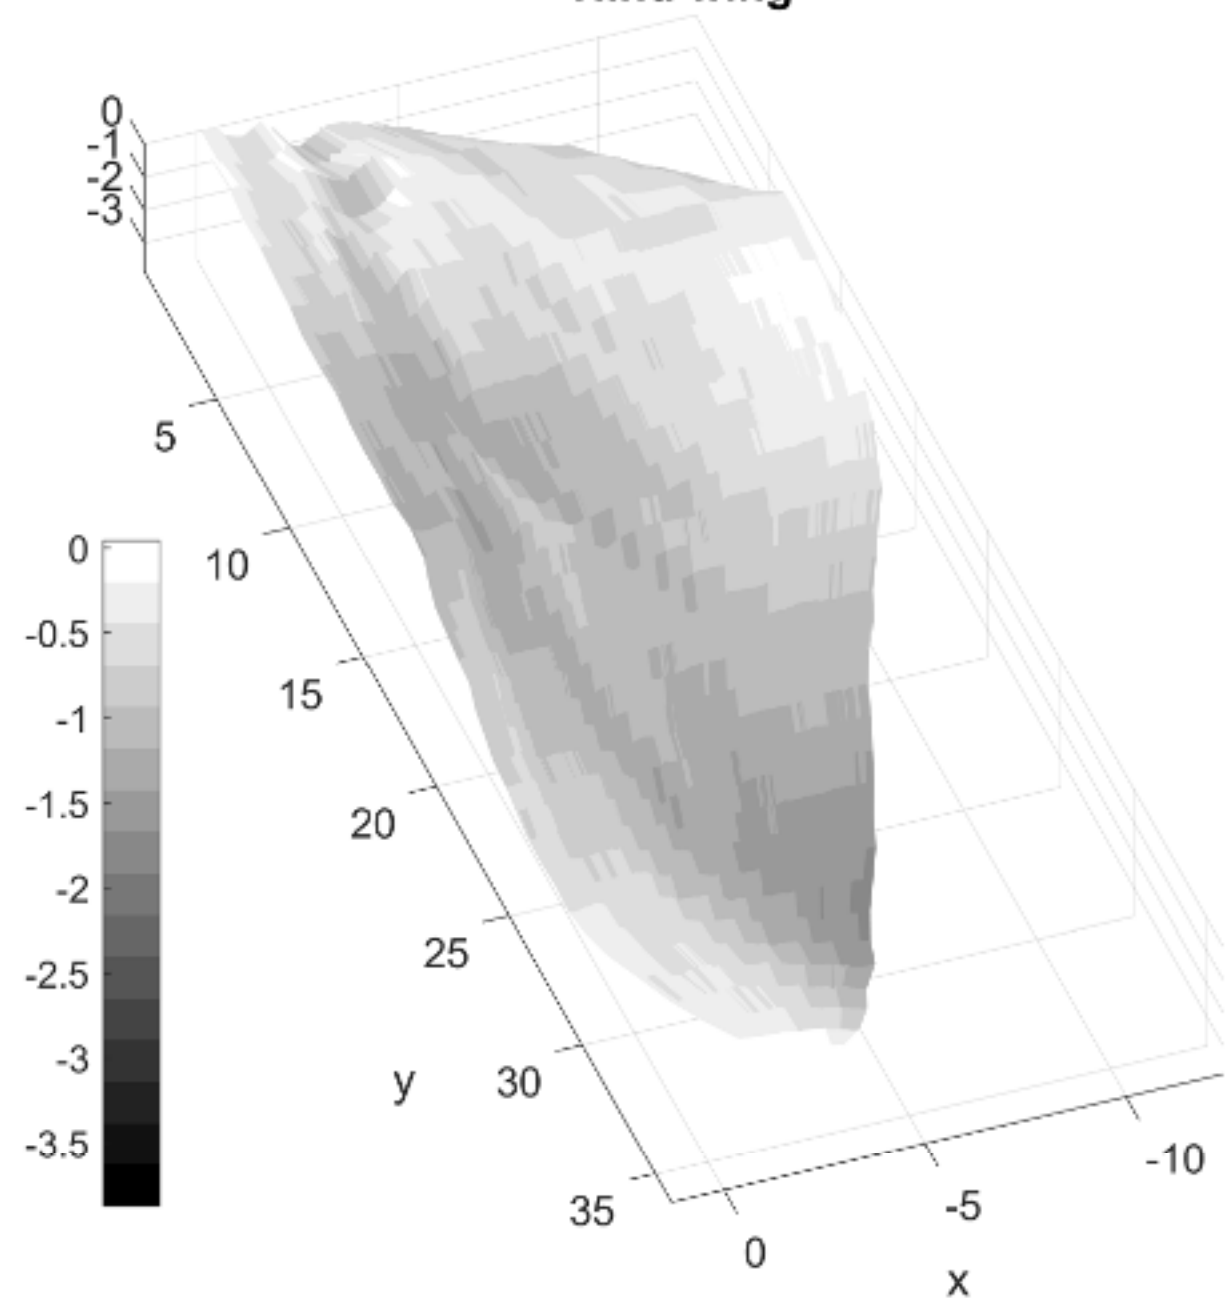

# Orthetrum cancellatum-F3-museum

## Forewing

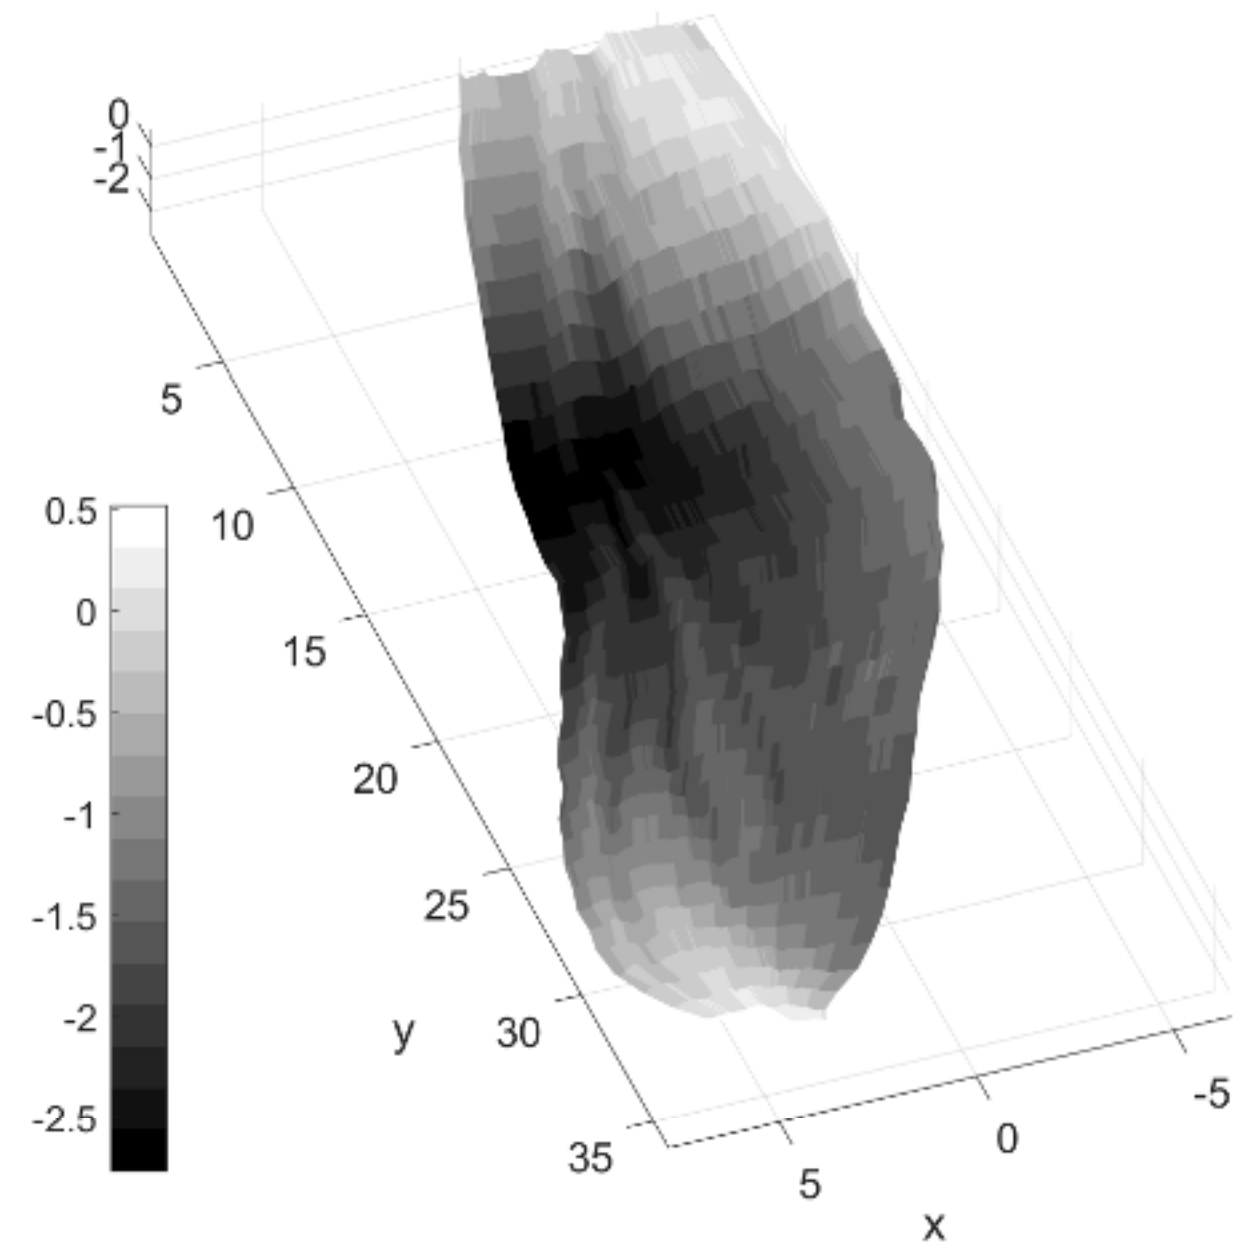

## Hind wing

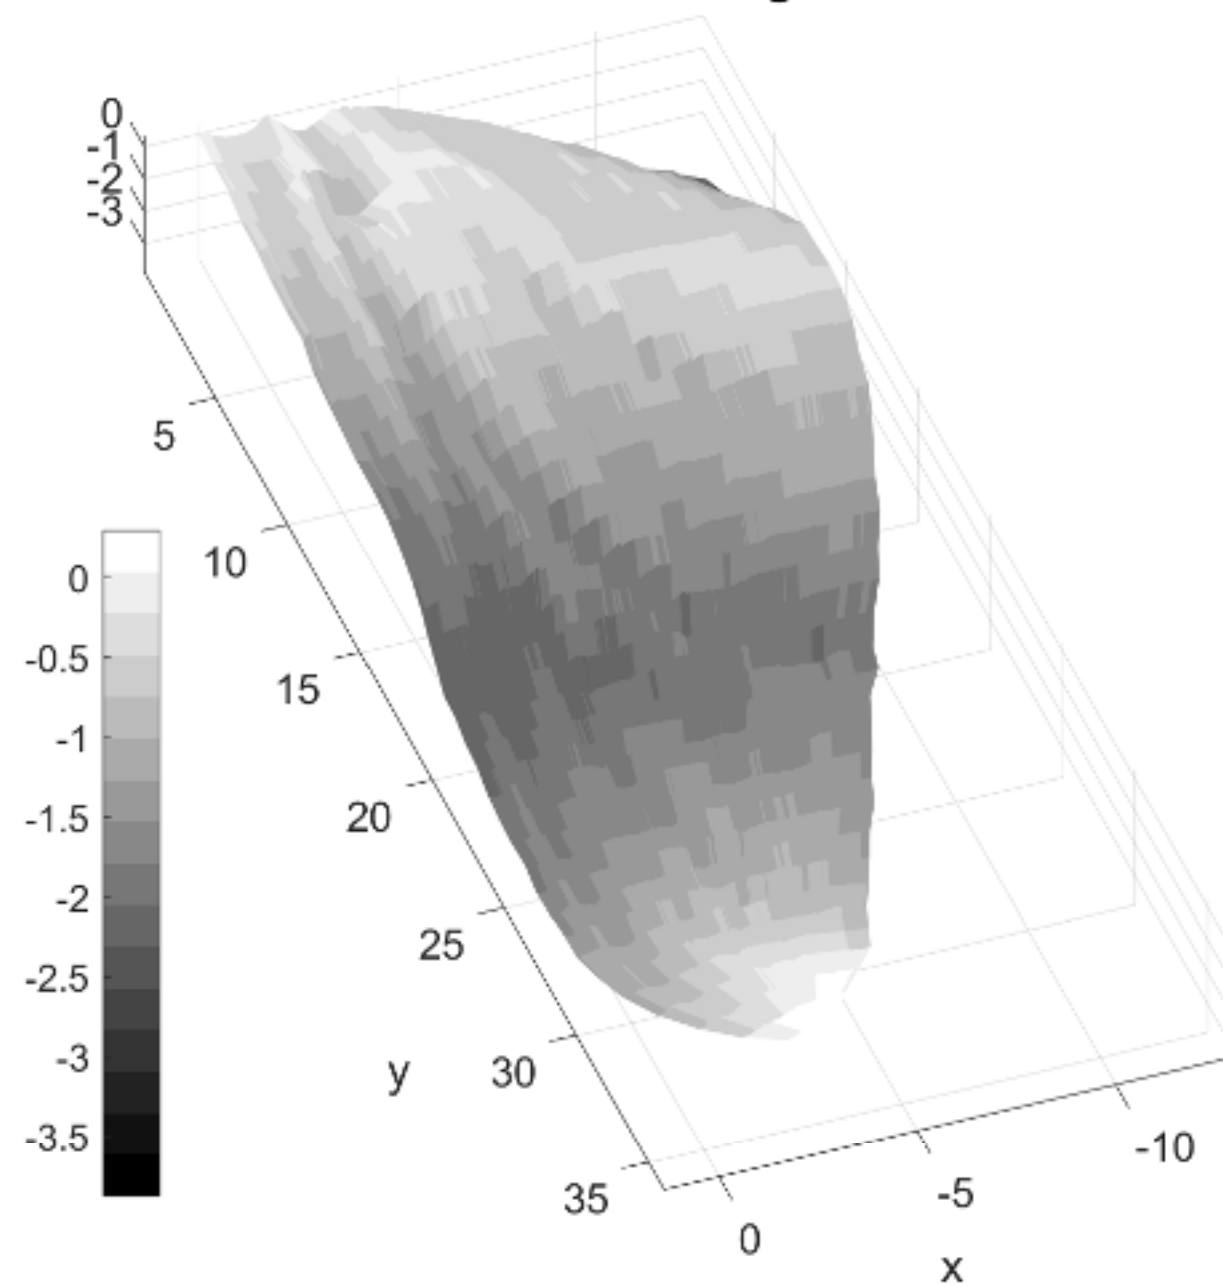

# Pantala flavescens-F1-museum

## Forewing

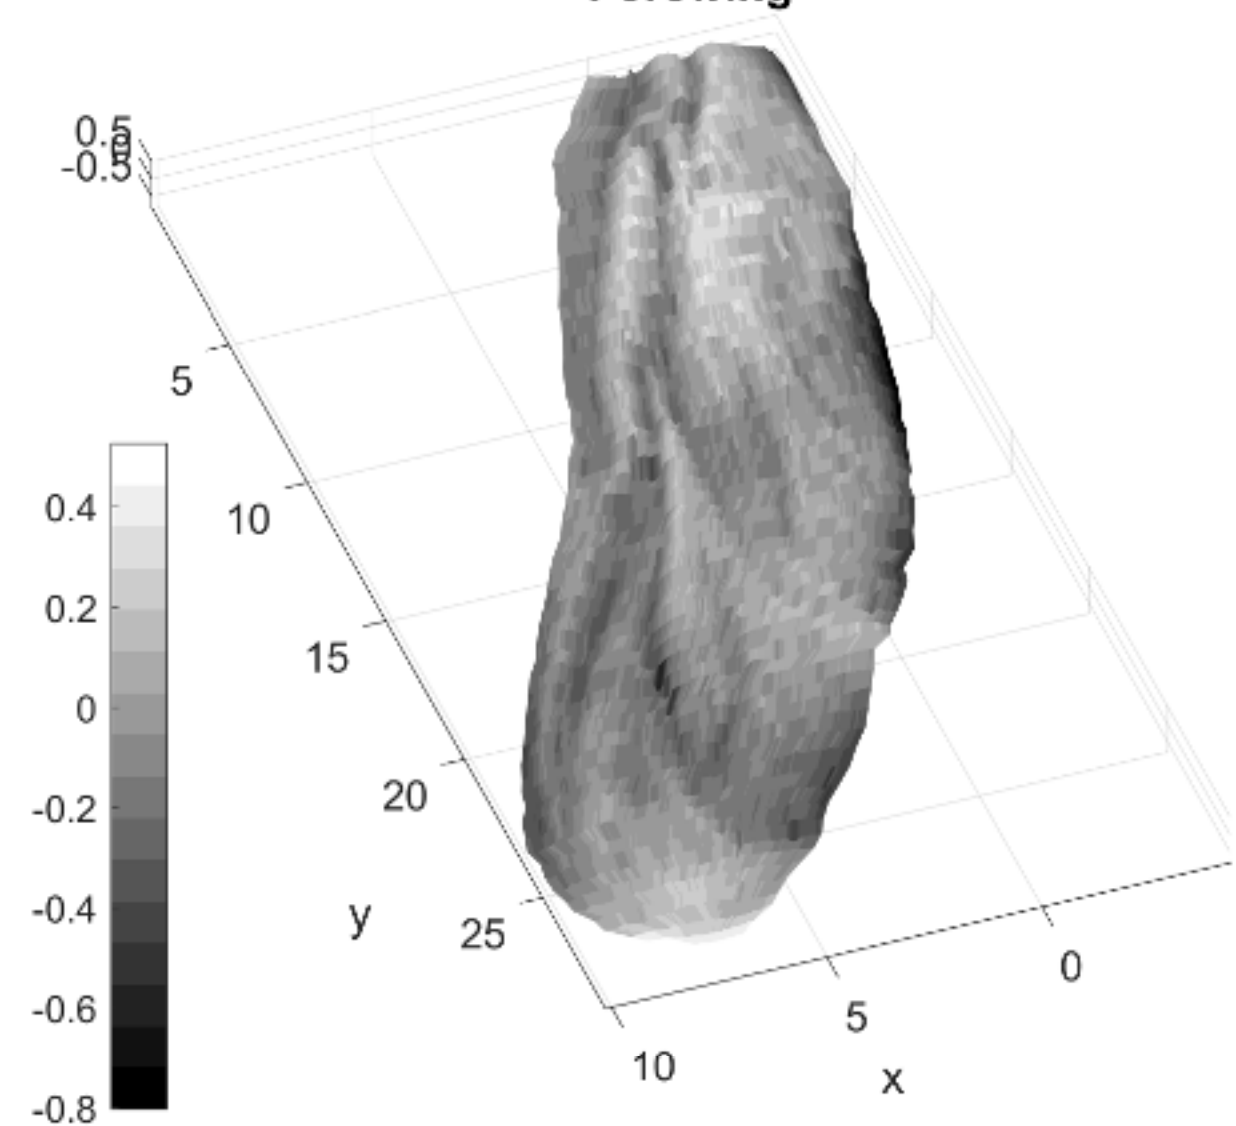

## Hind wing

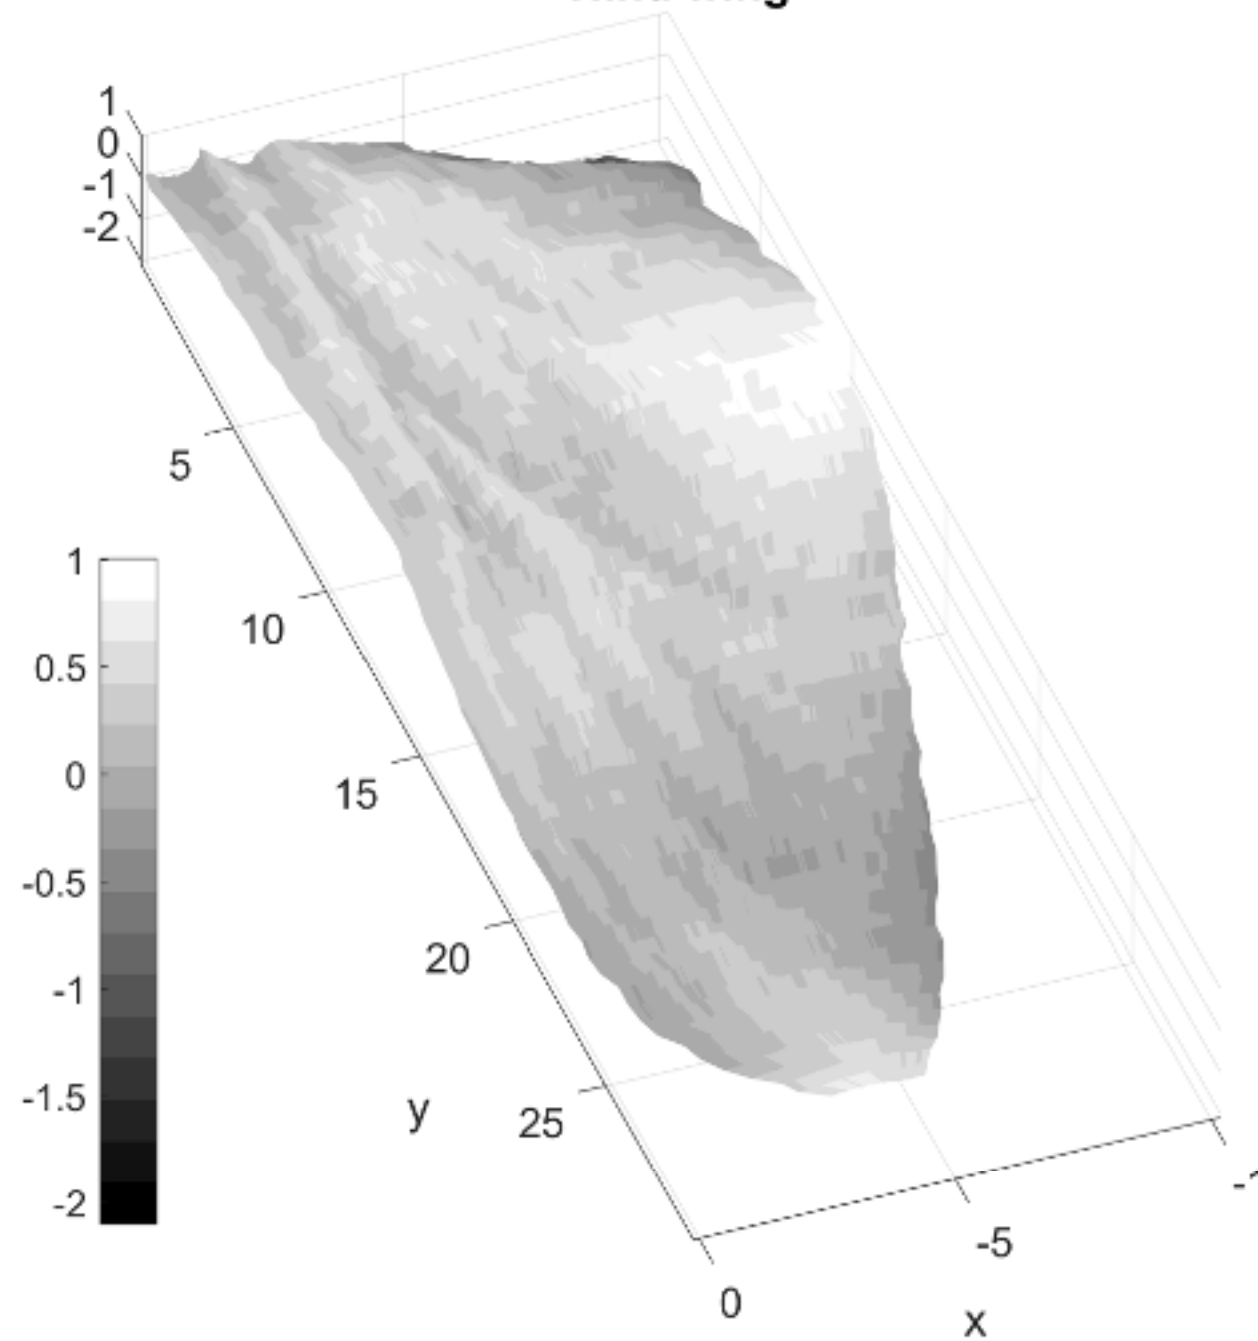

# Pantala flavescens-M1-museum

## Forewing

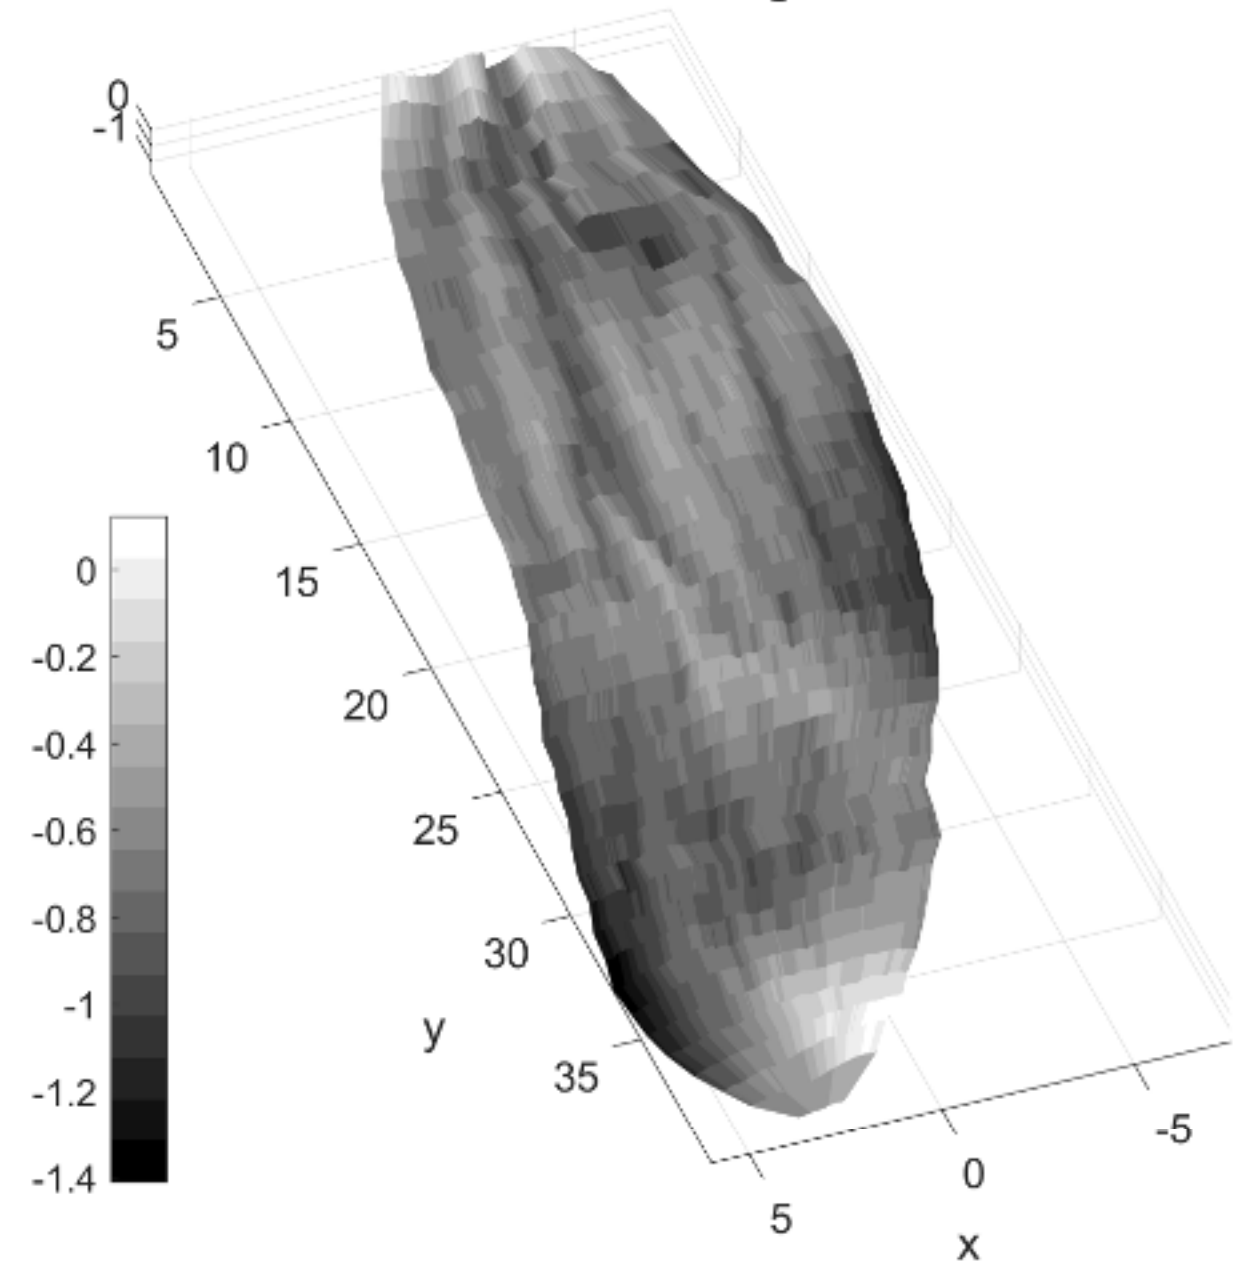

## Hind wing

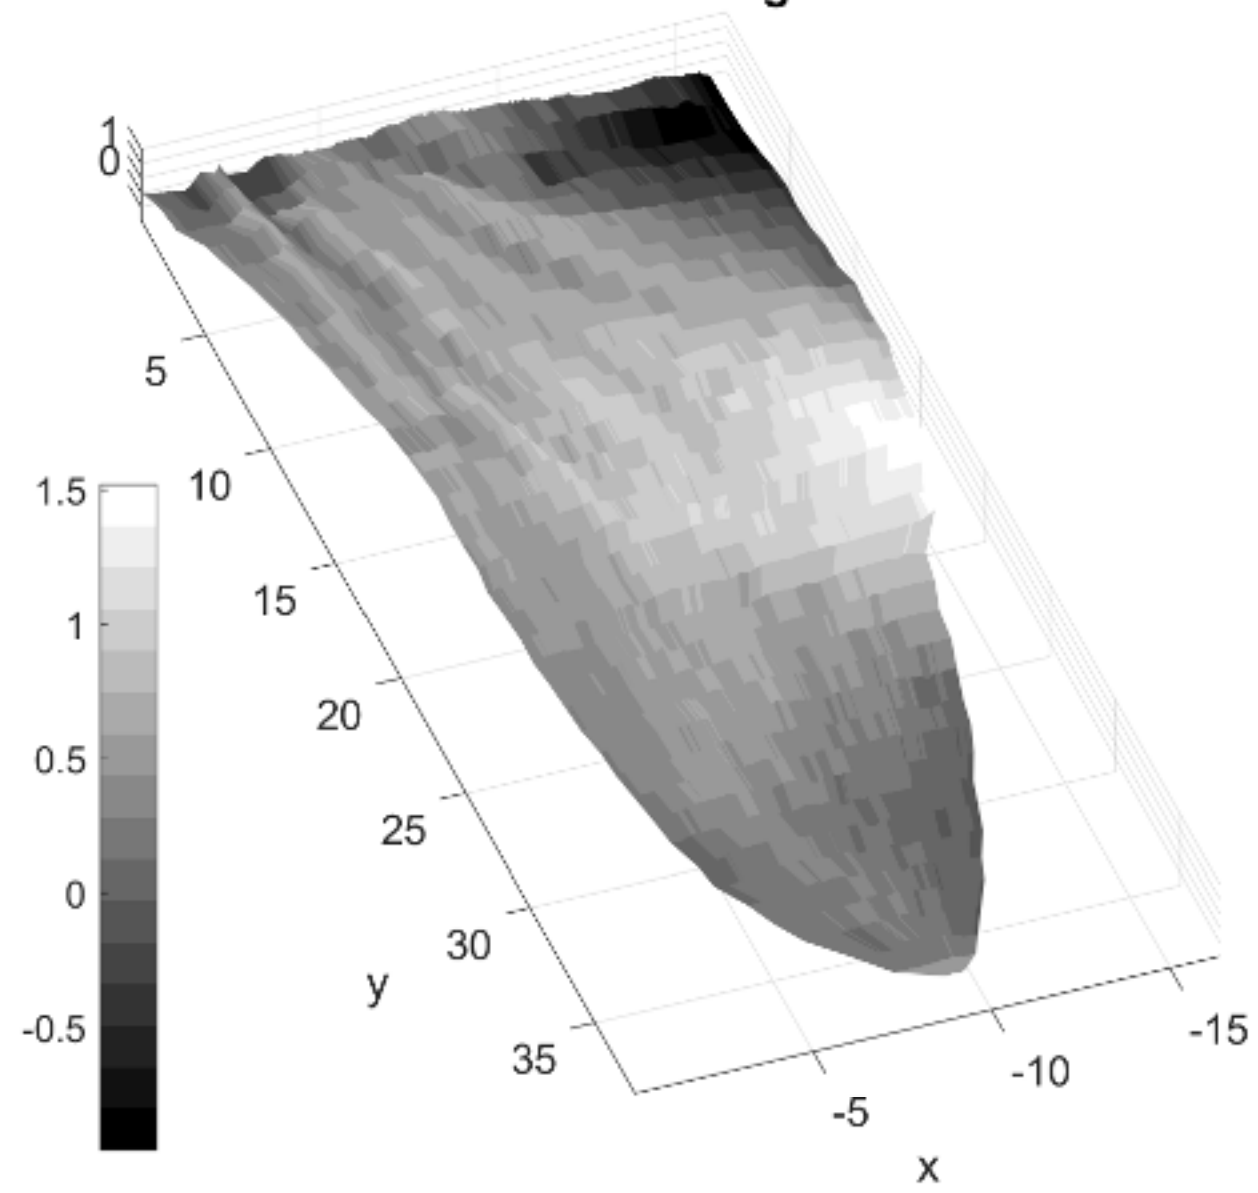



# Pantala flavescens-M2-museum

## Forewing

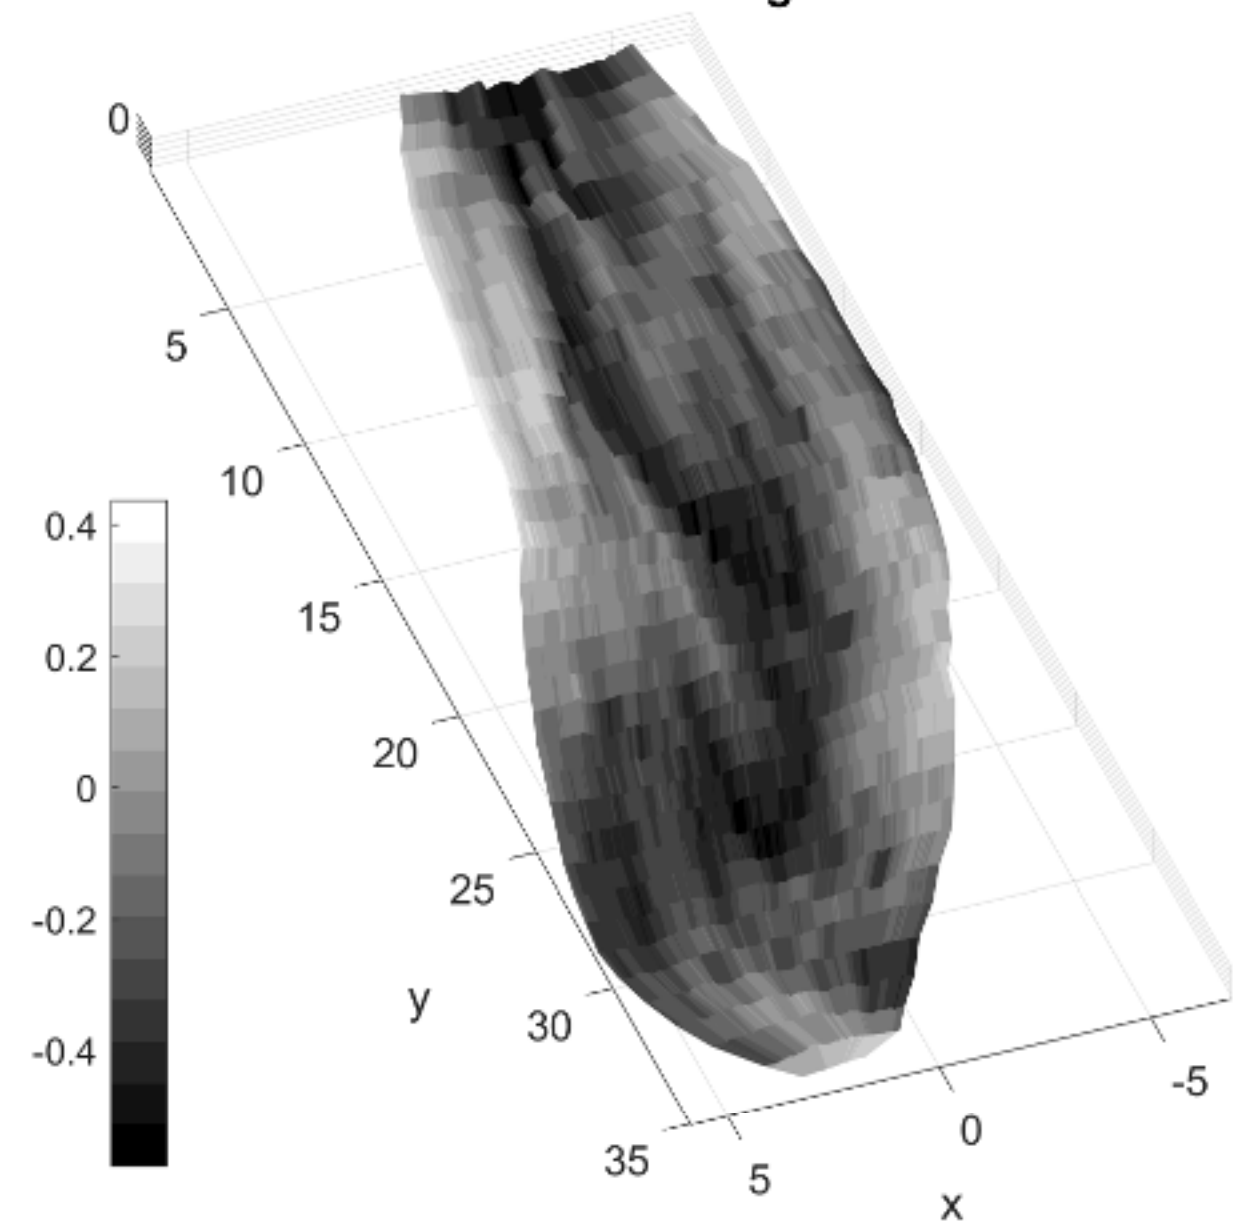

## Hind wing

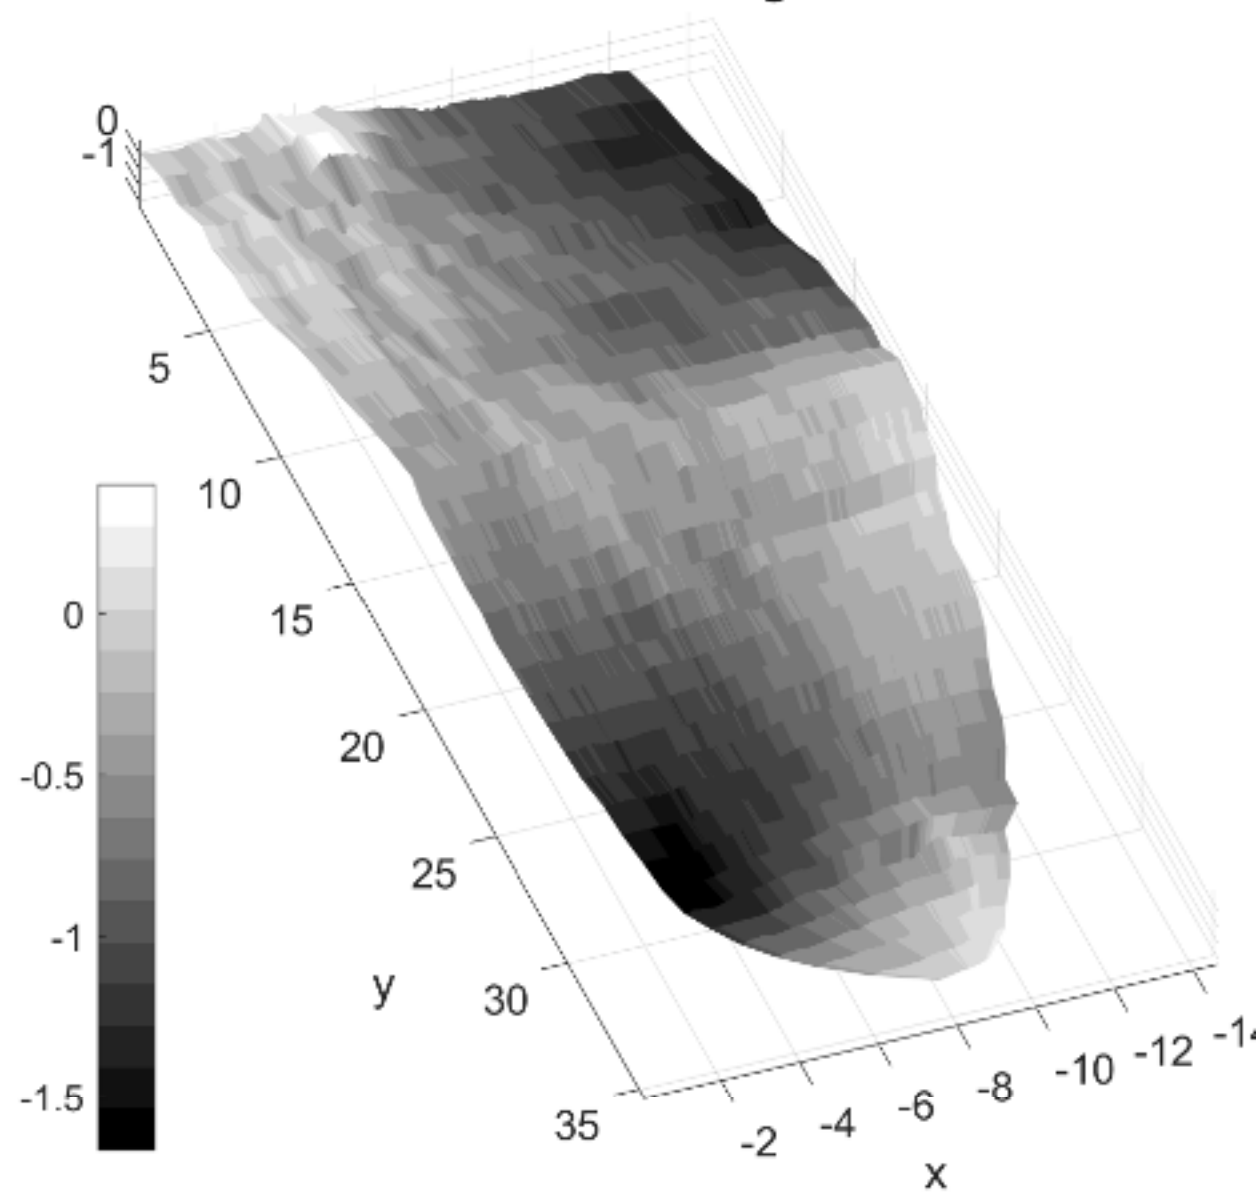

# Somatochlora metallica-F1-museum

## Forewing

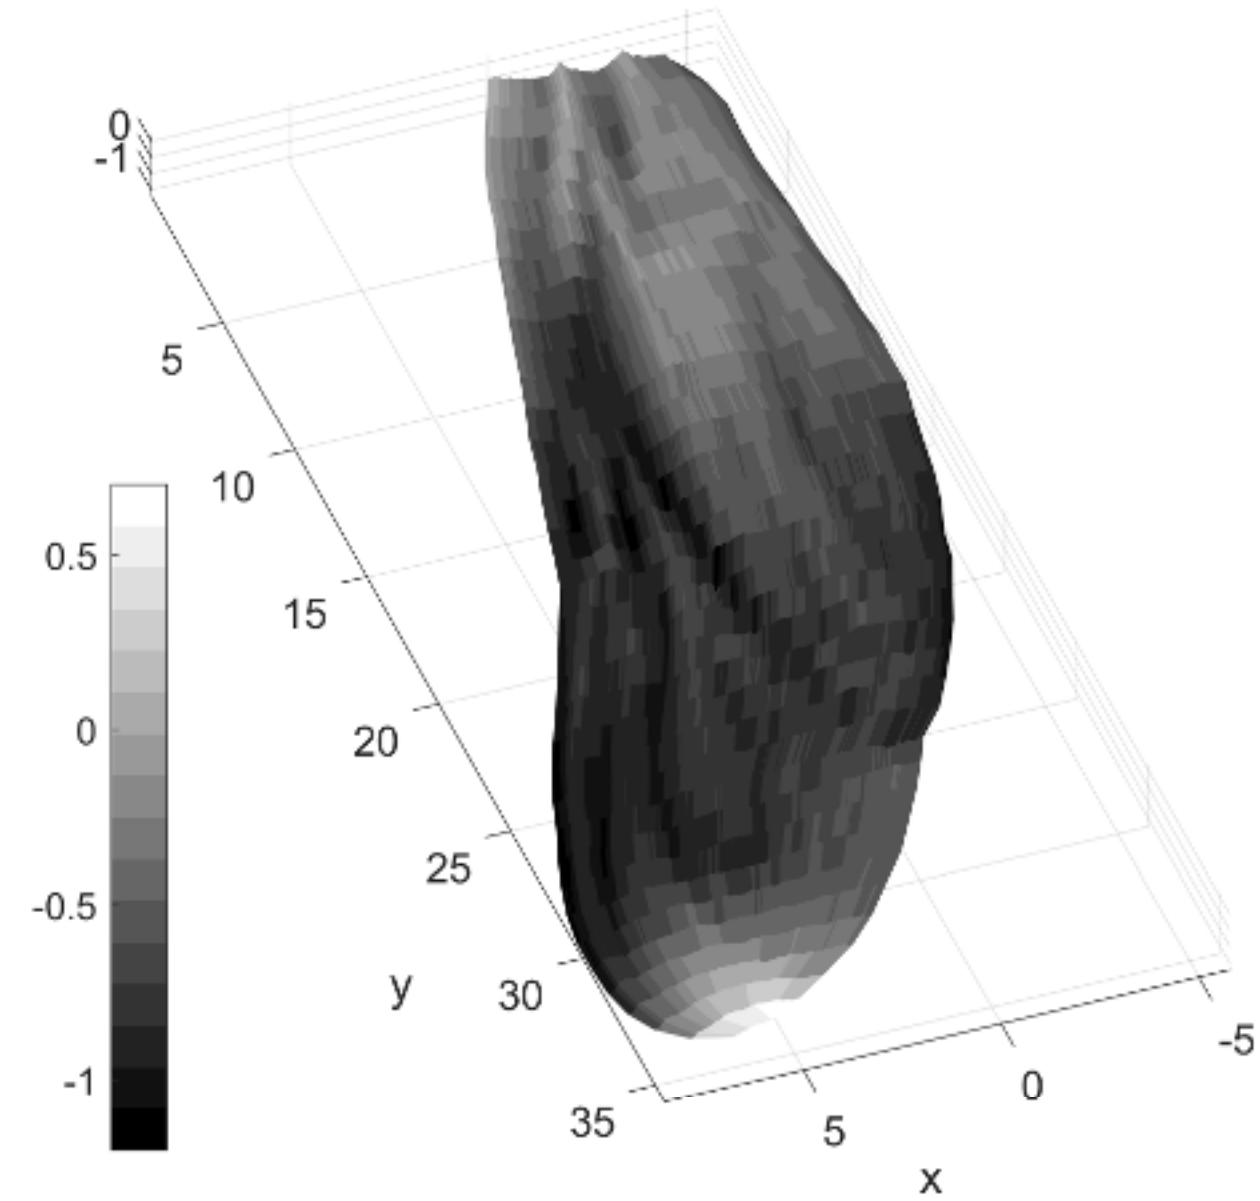

## Hind wing

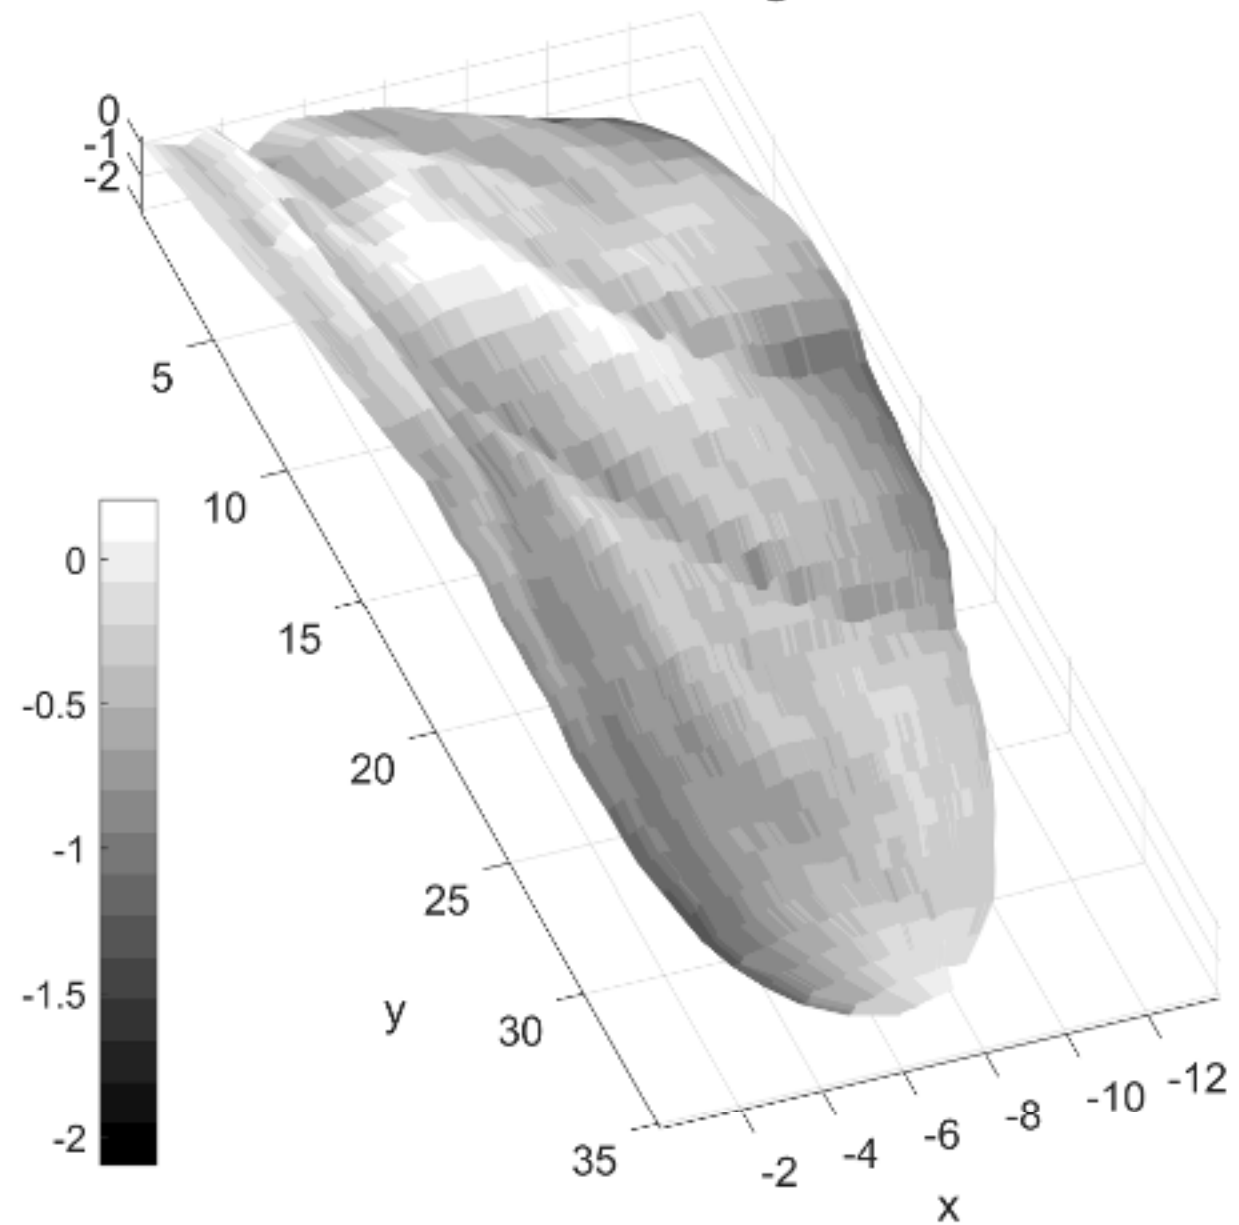

# Somatochlora metallica-F2-museum

## Forewing

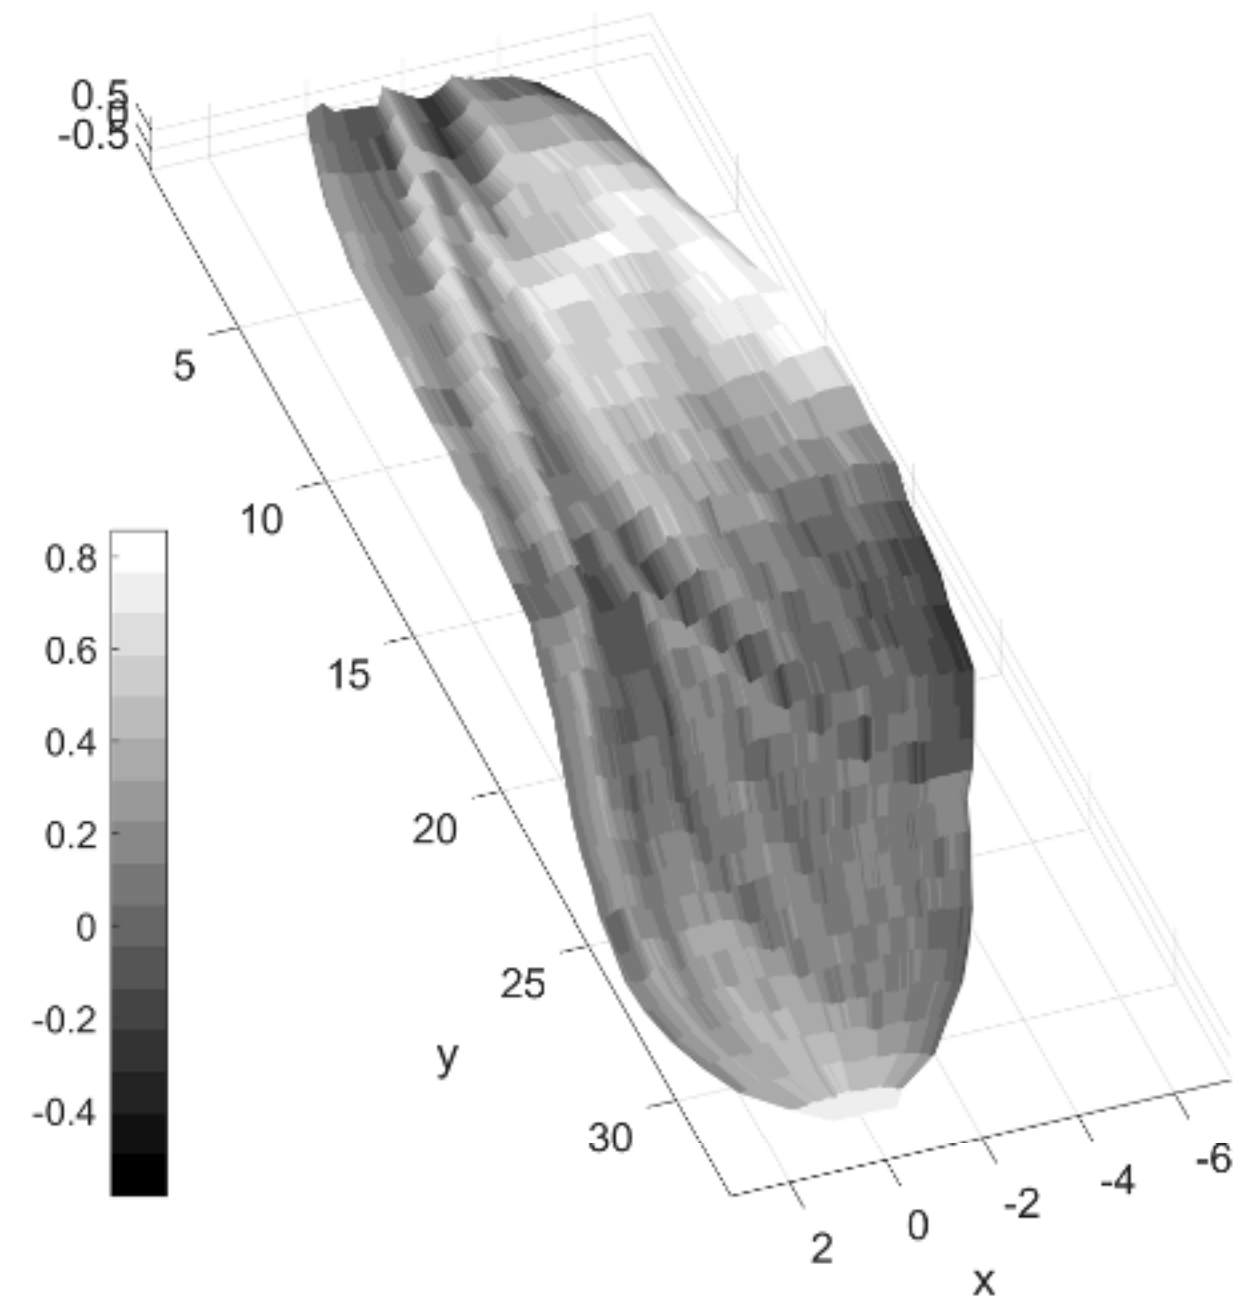

## Hind wing

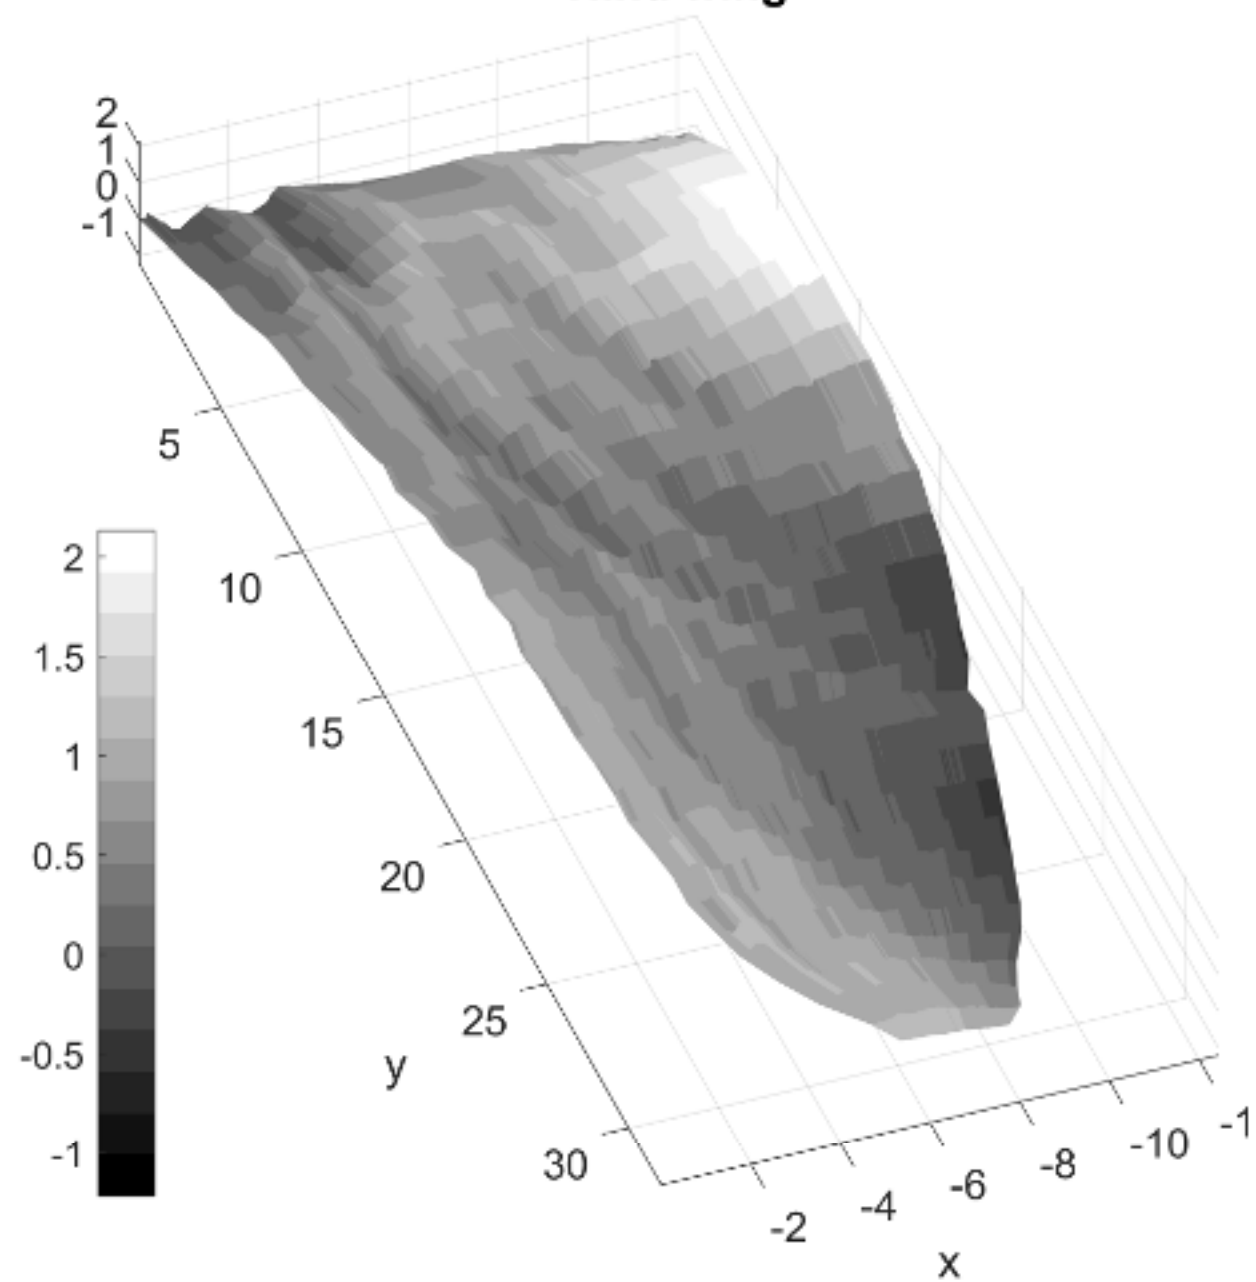

# Somatochlora metallica-F3-museum

## Forewing

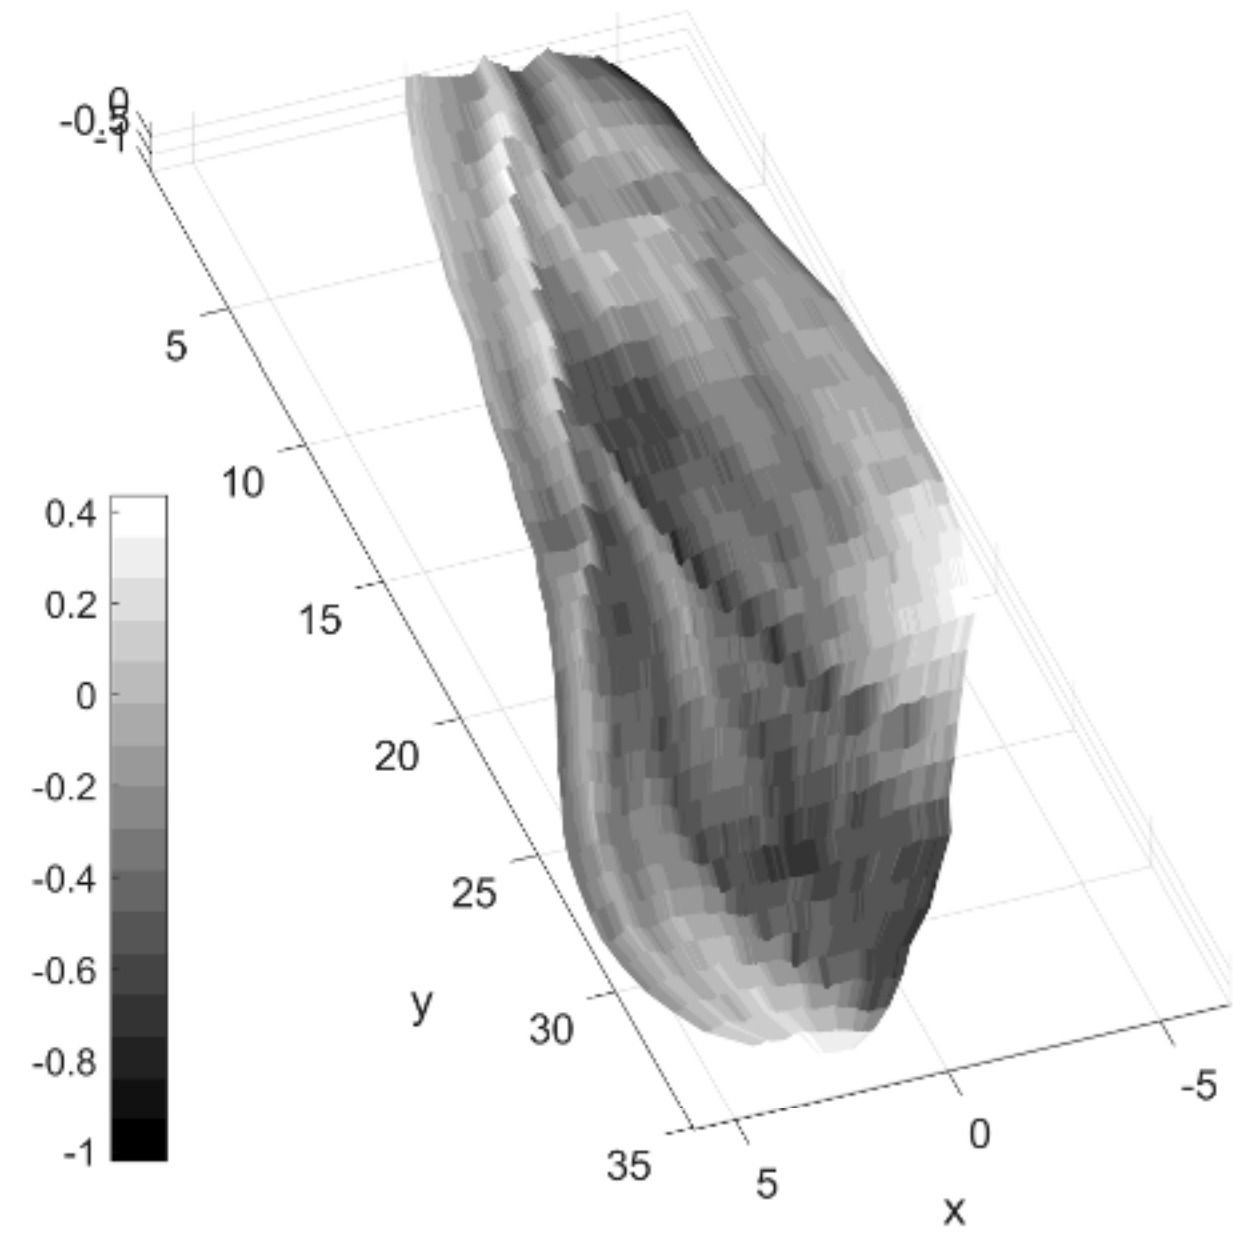

## Hind wing

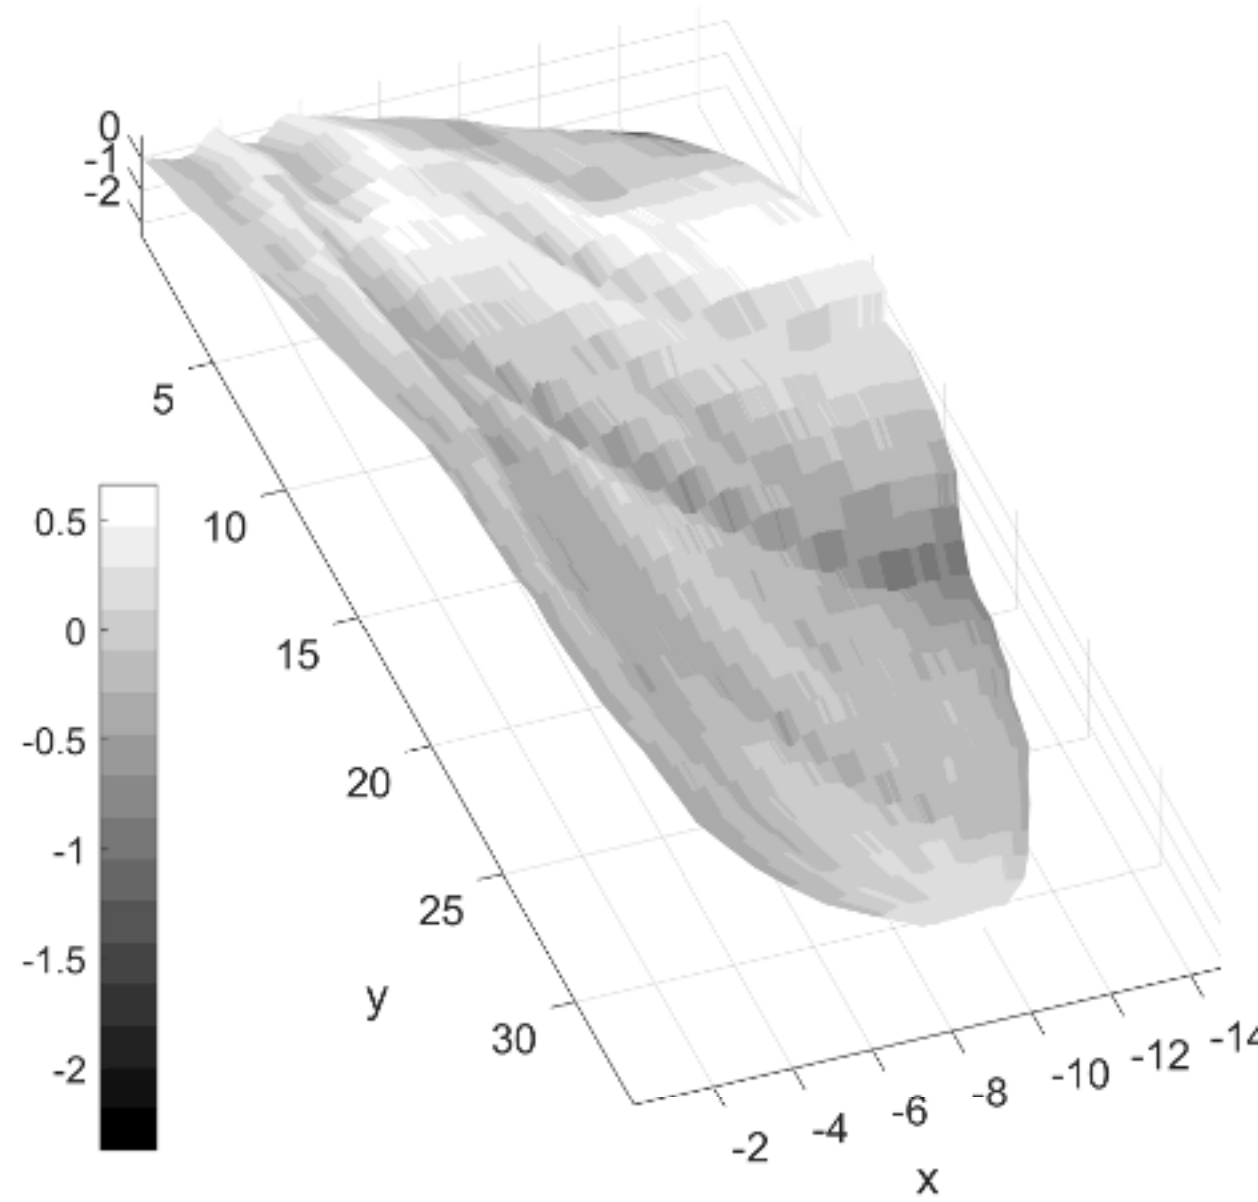

# Sympetrum corruptum-M1-museum

## Forewing

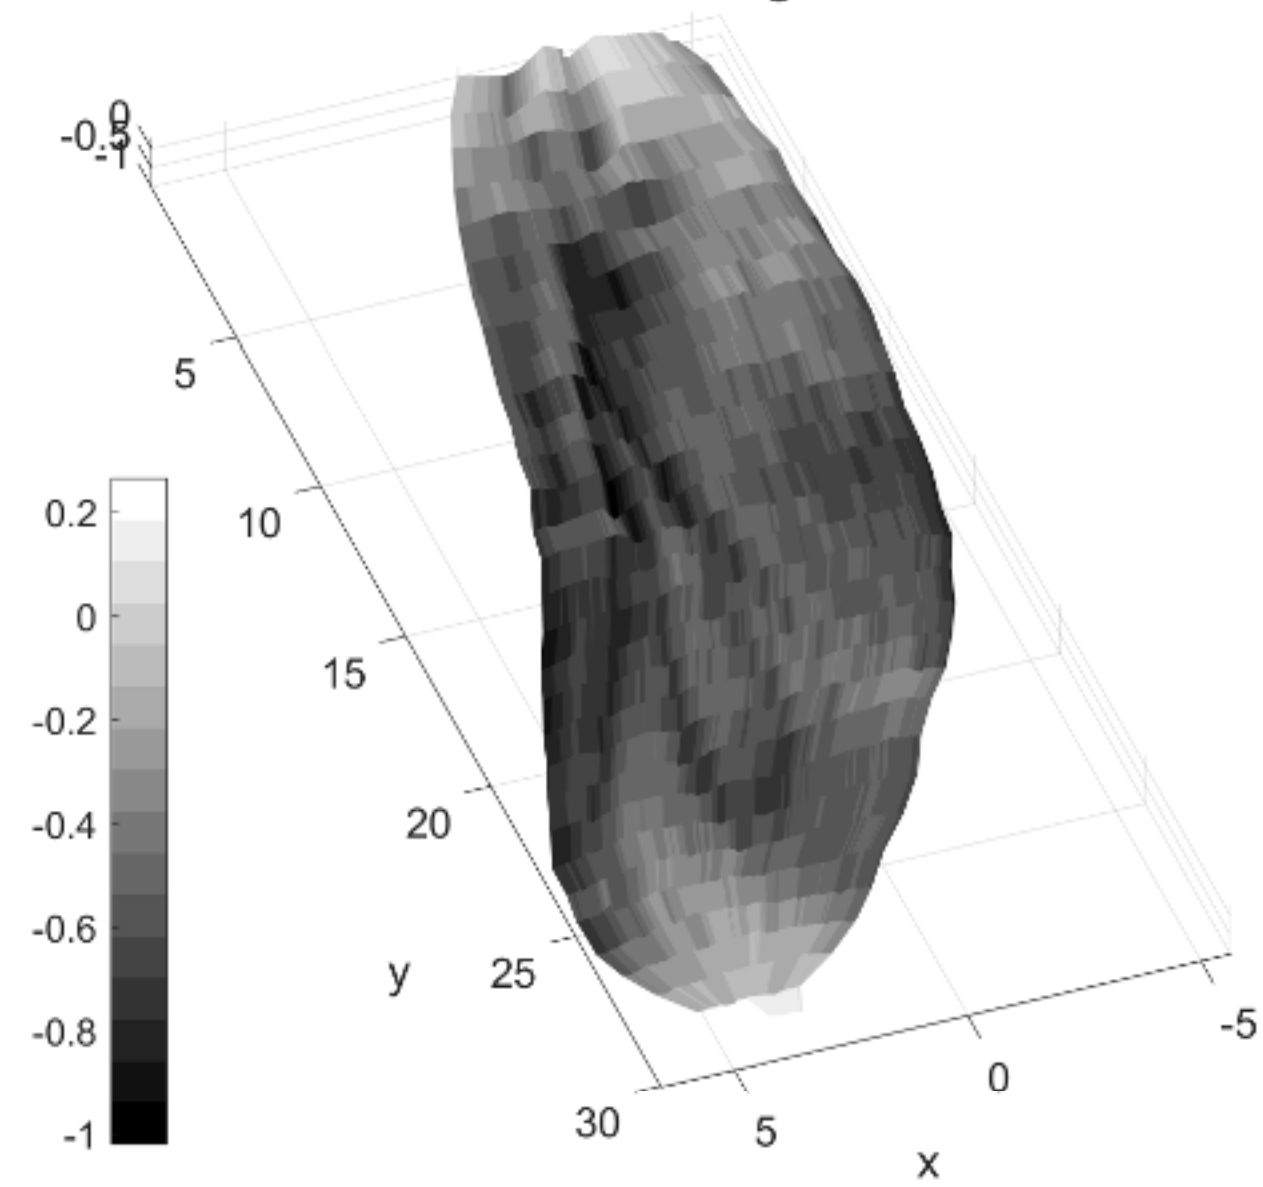

## Hind wing

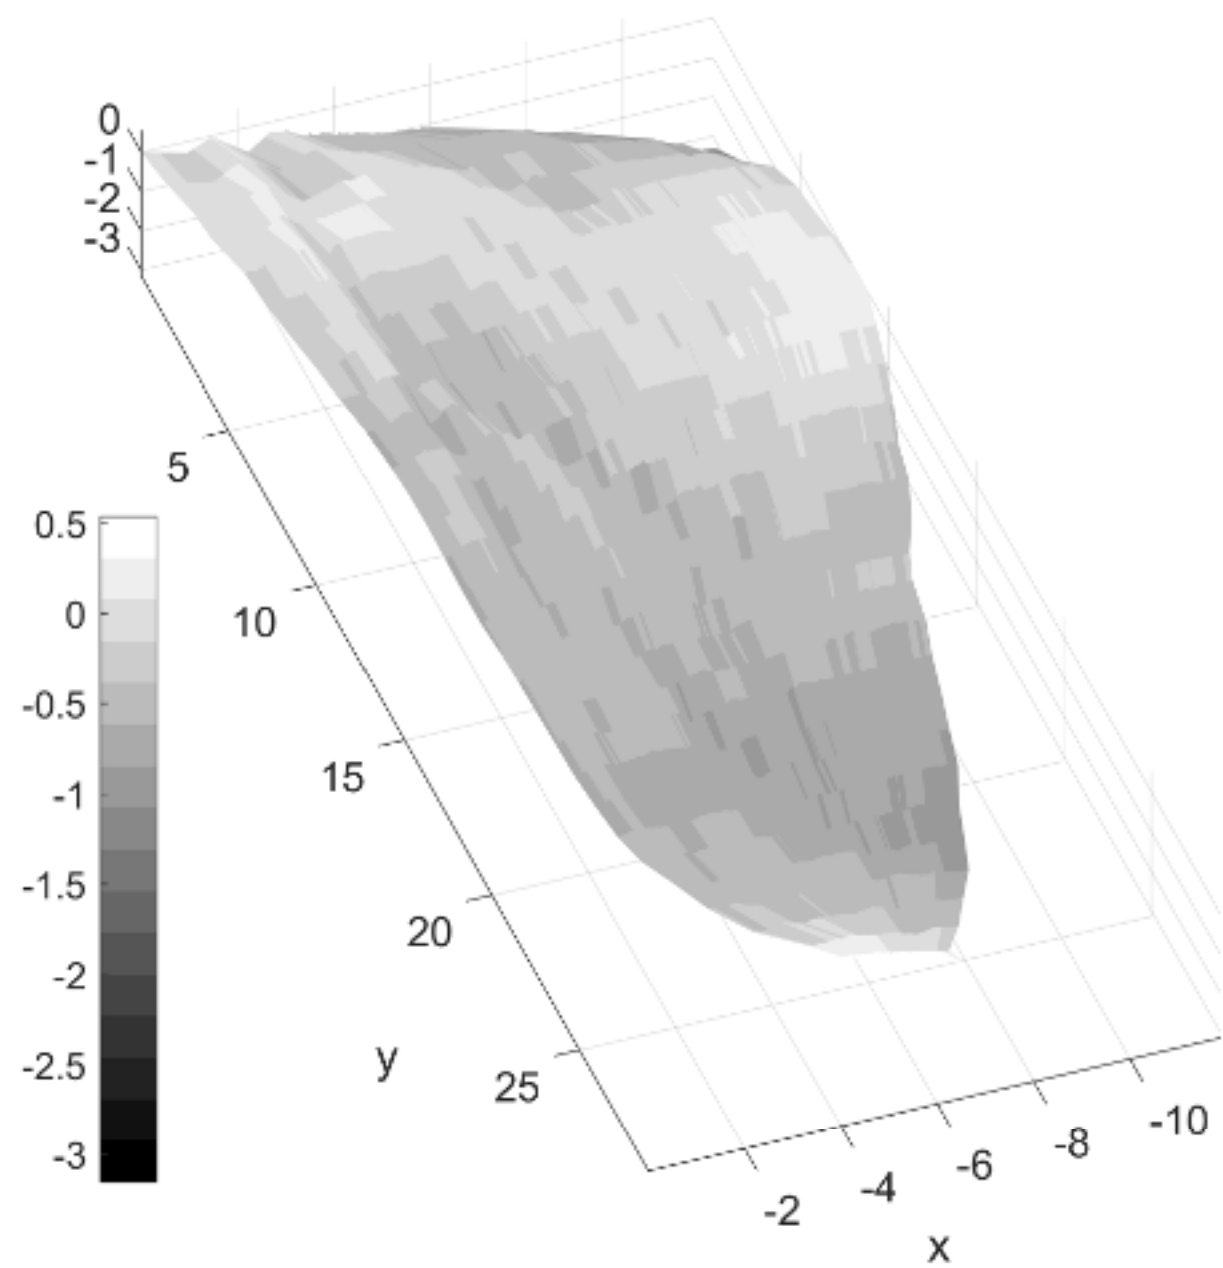

# Sympetrum corruptum-M2-museum

## Forewing

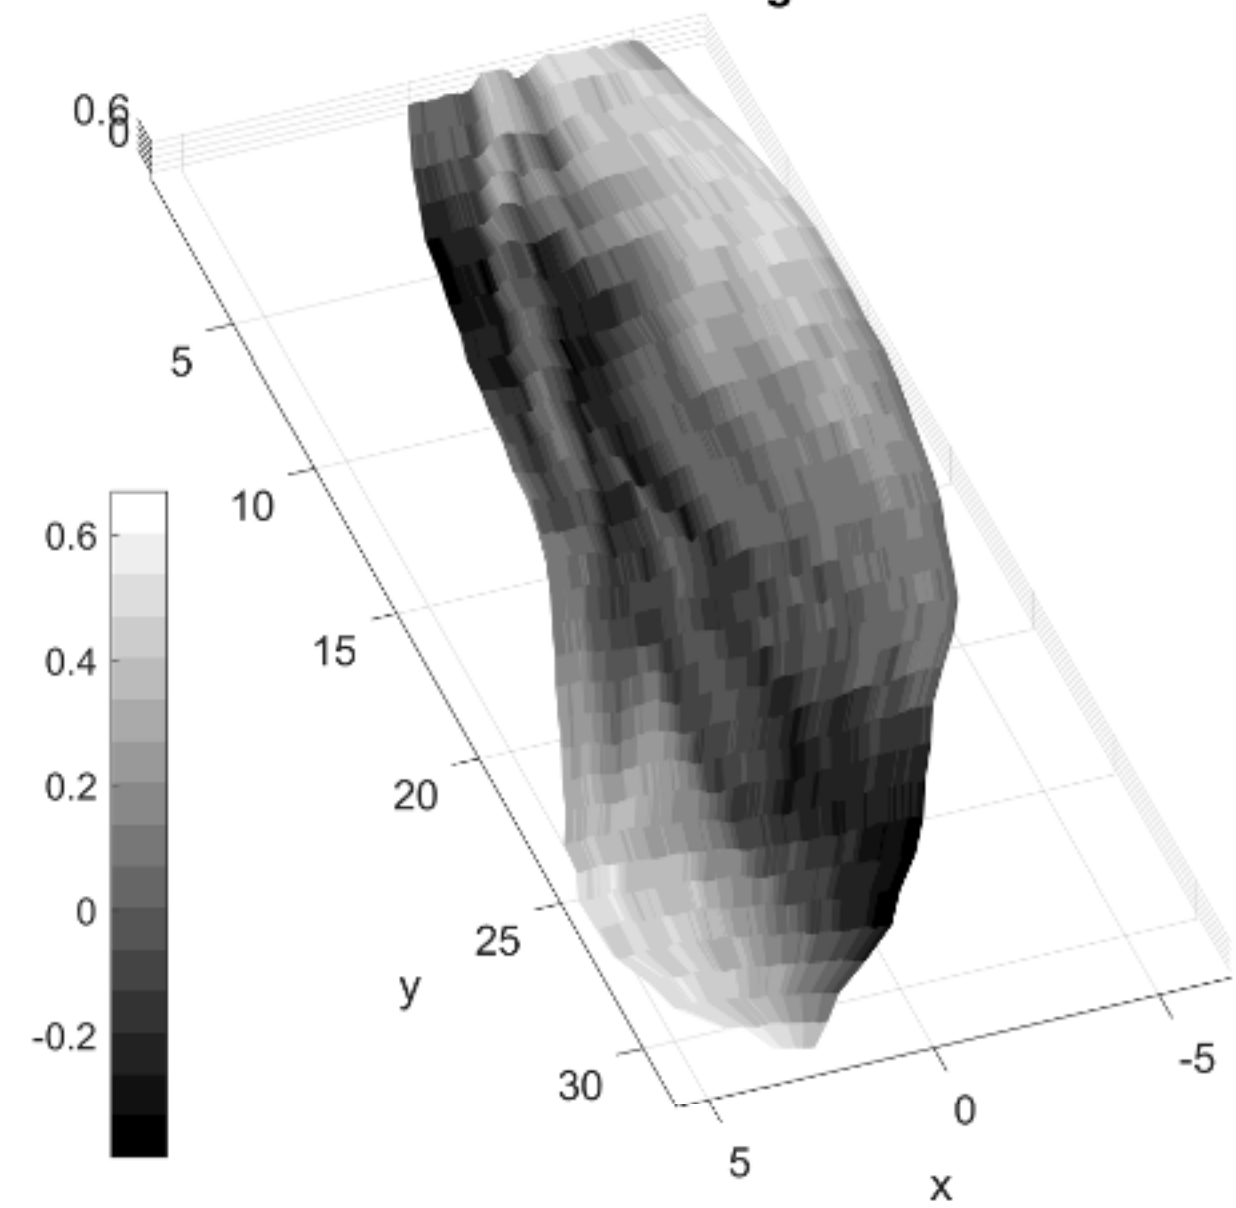

## Hind wing

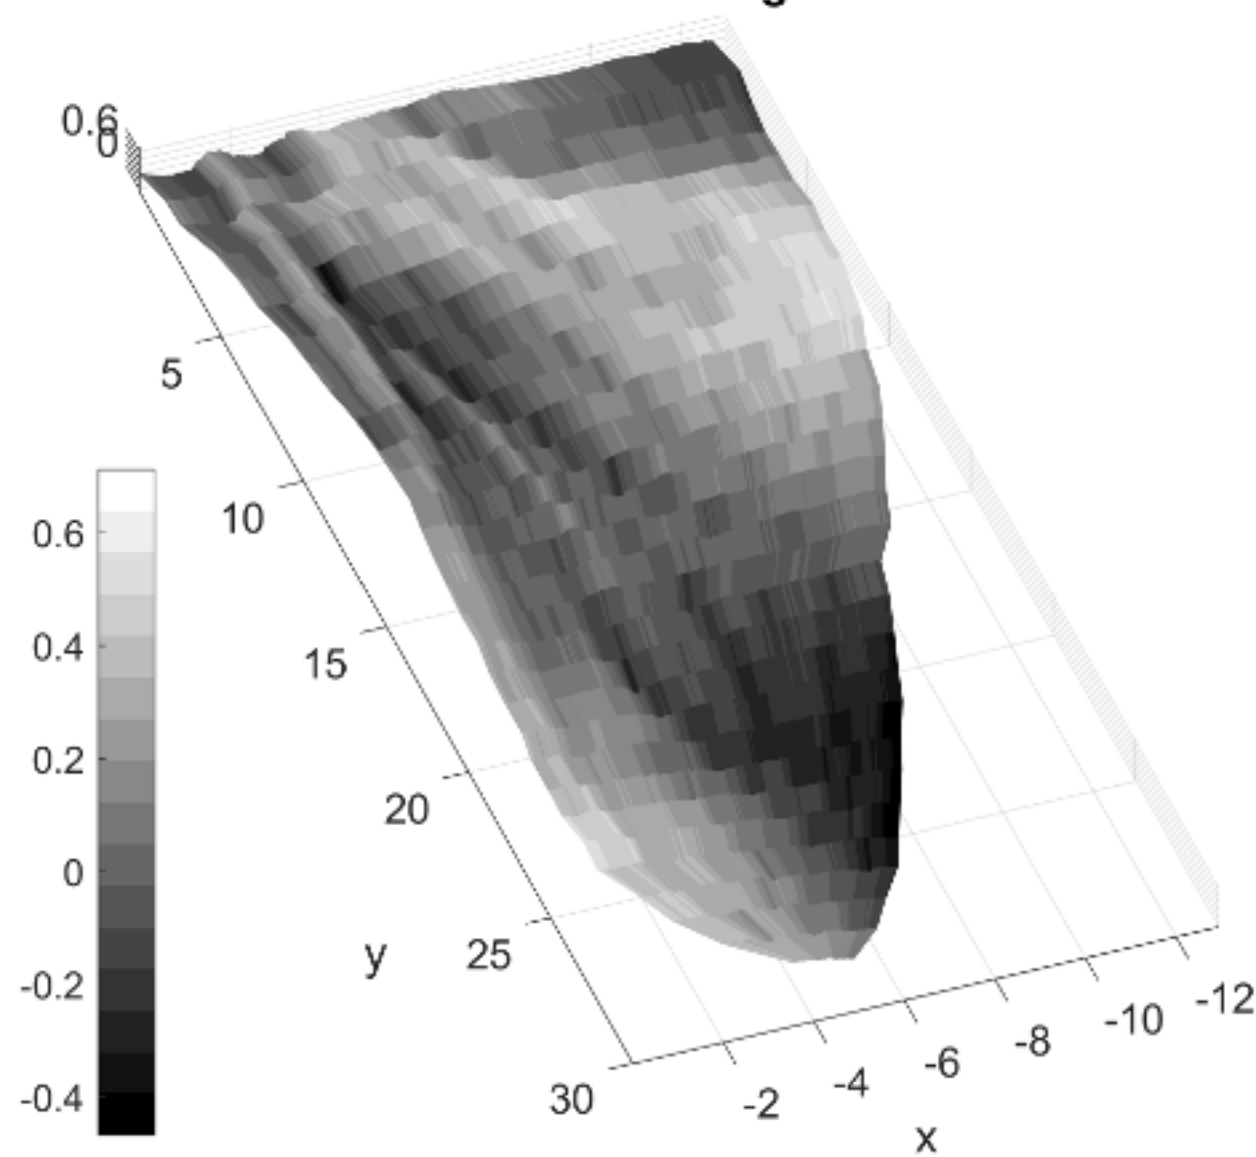

# Sympetrum costiferum-M1-museum

## Forewing

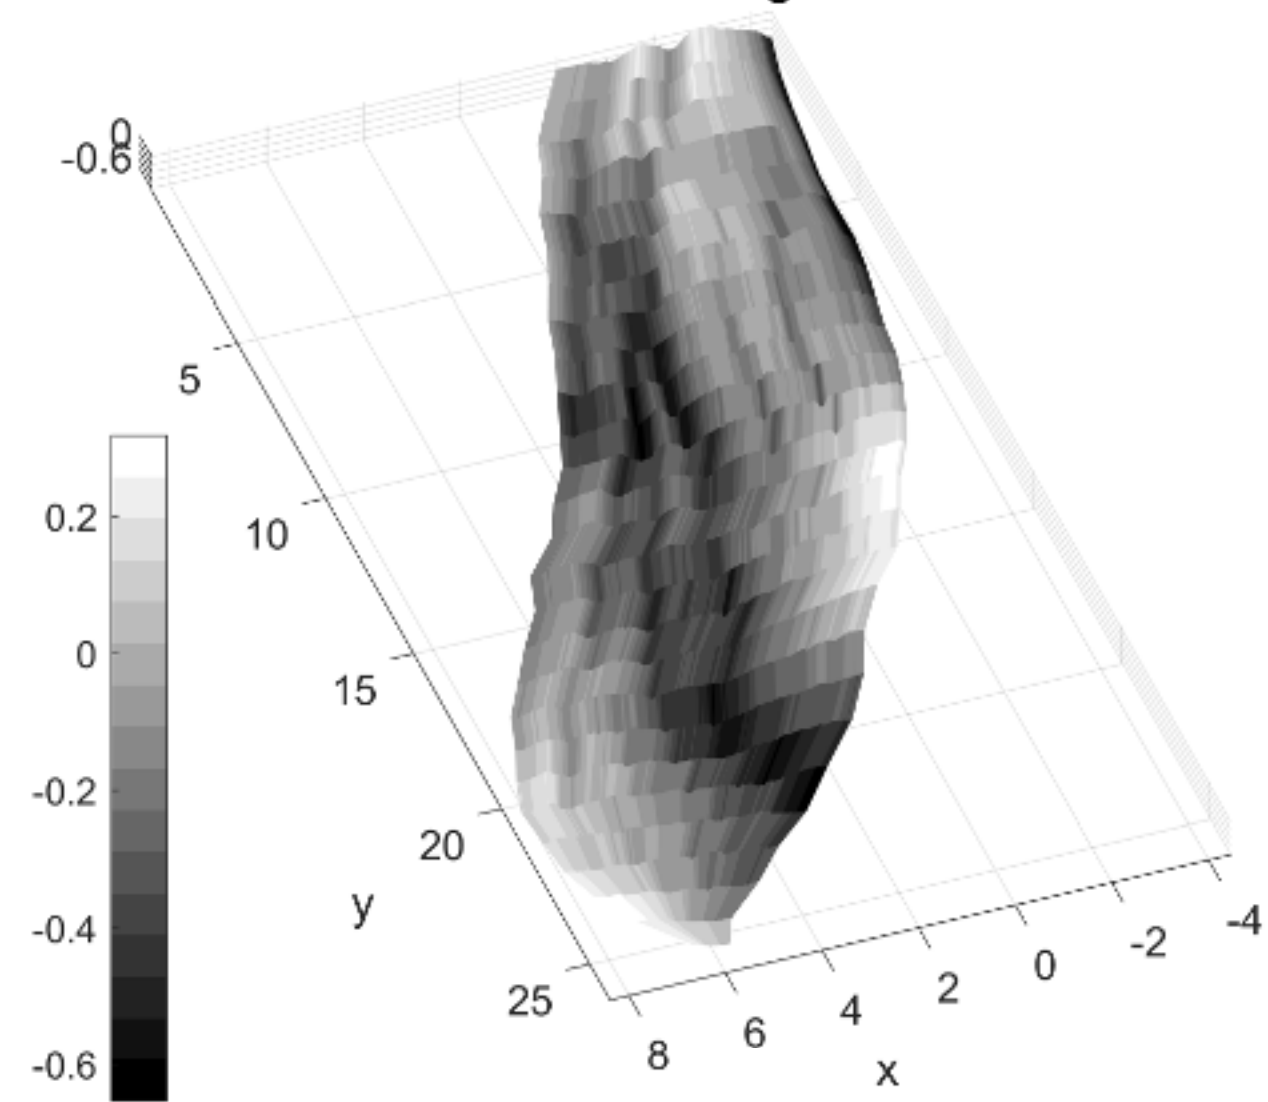

## Hind wing

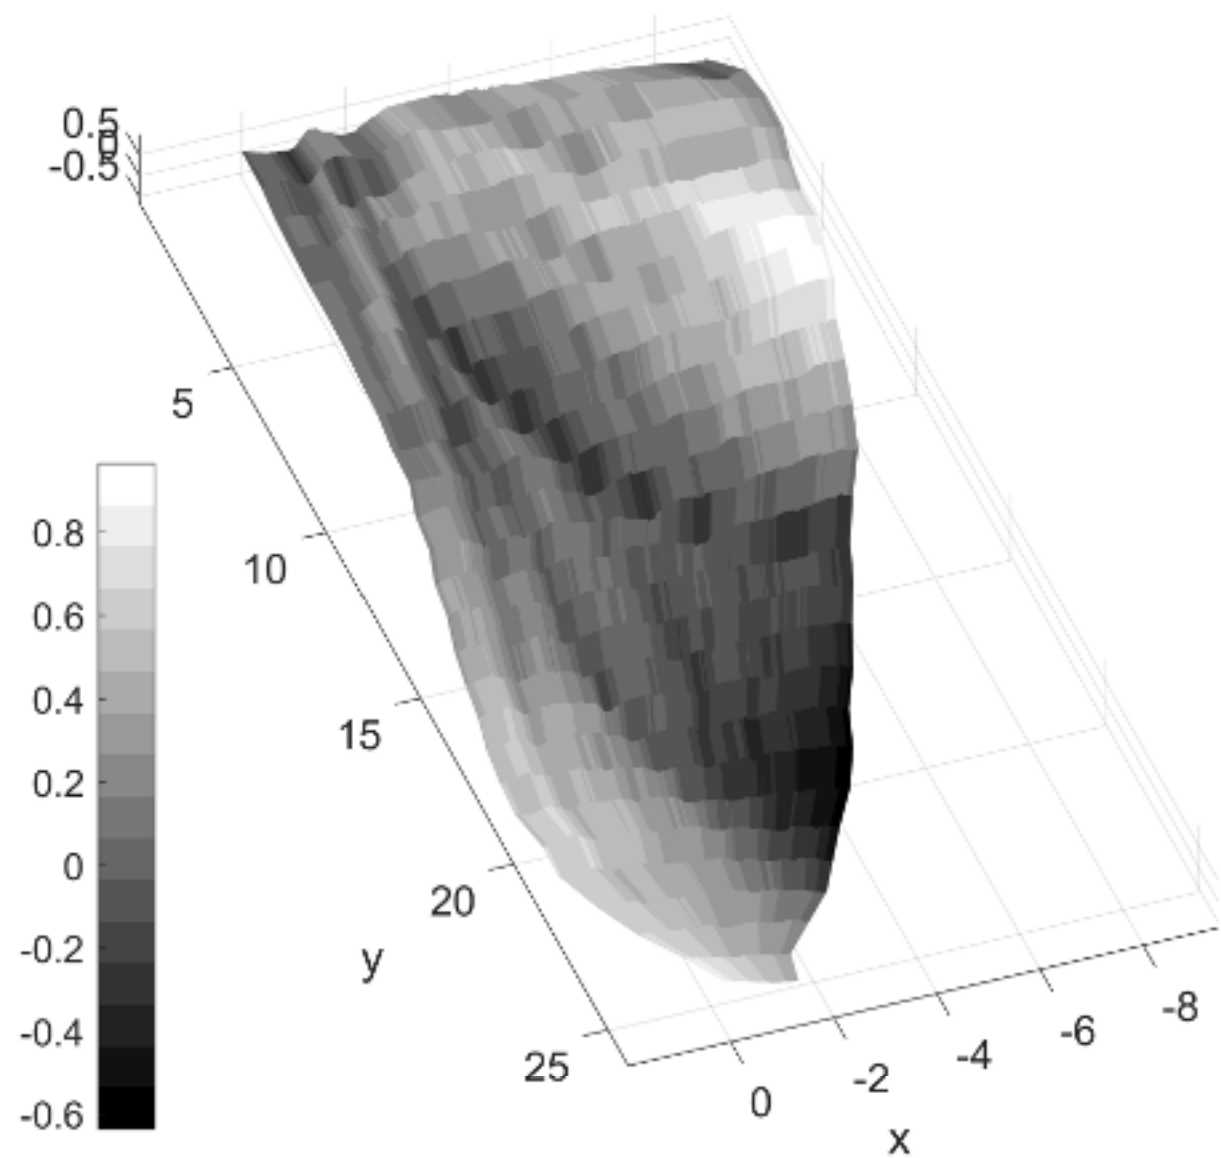

# Sympetrum rubicundulum-F1-museum

## Forewing

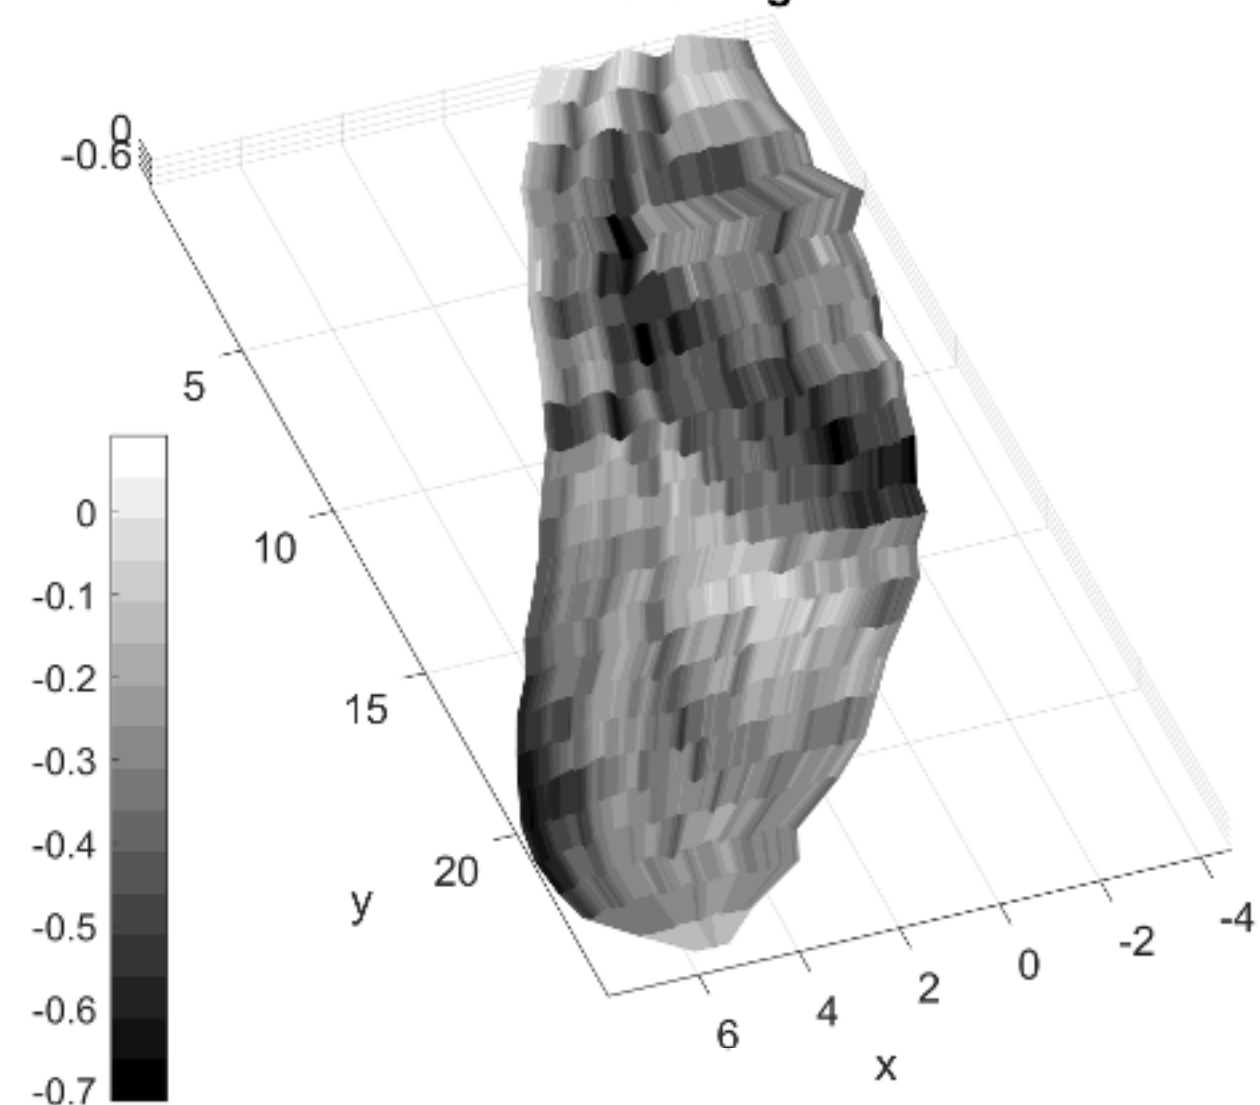

## Hind wing

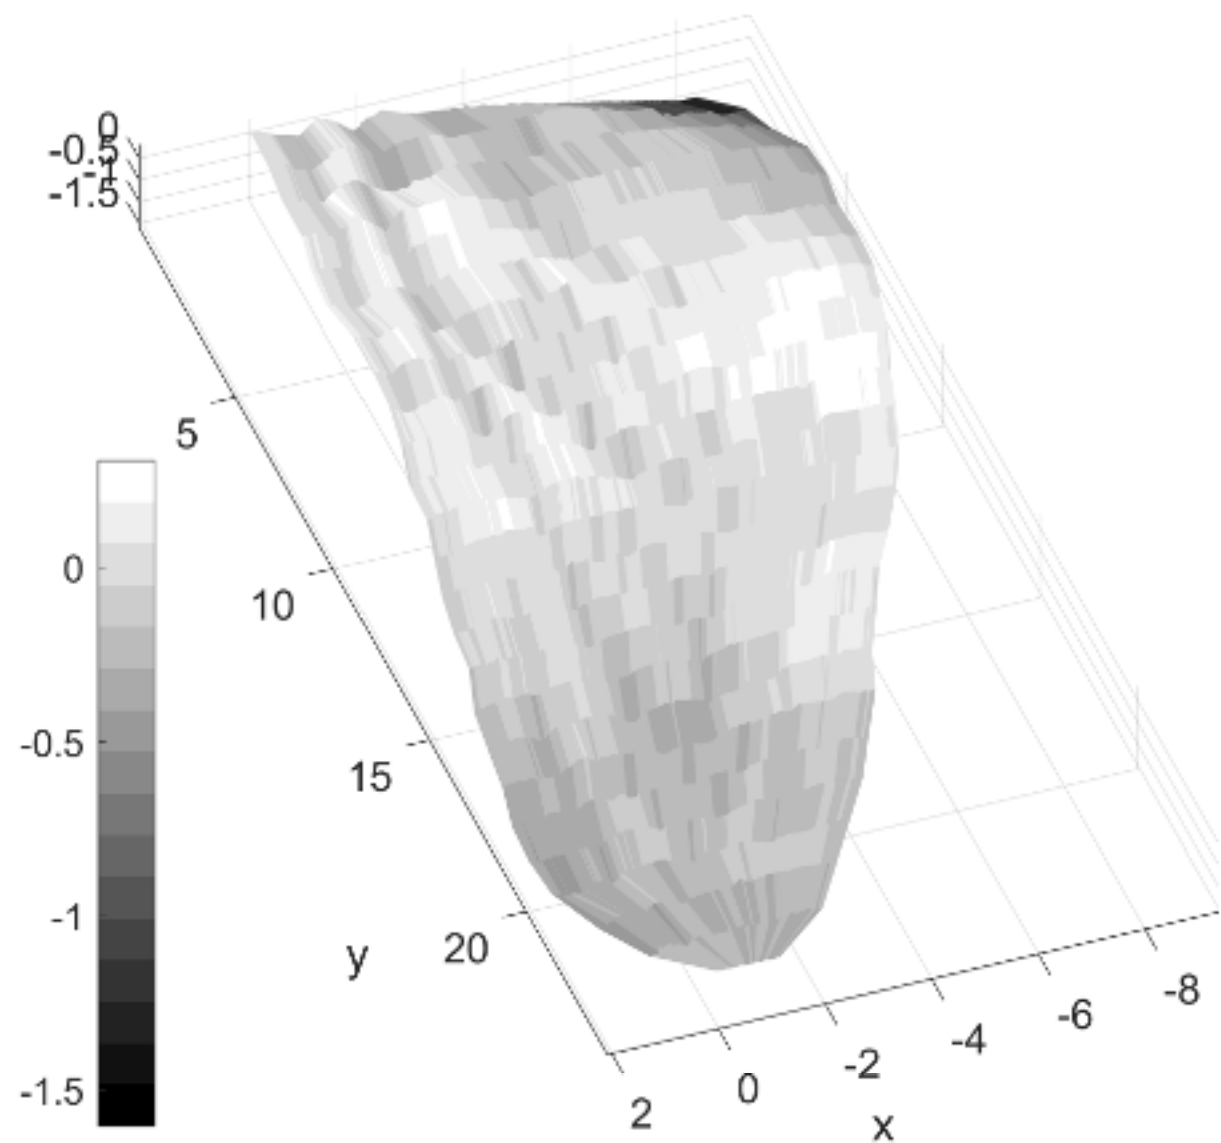



# Sympetrum rubicundulum-F2-museum

## Forewing

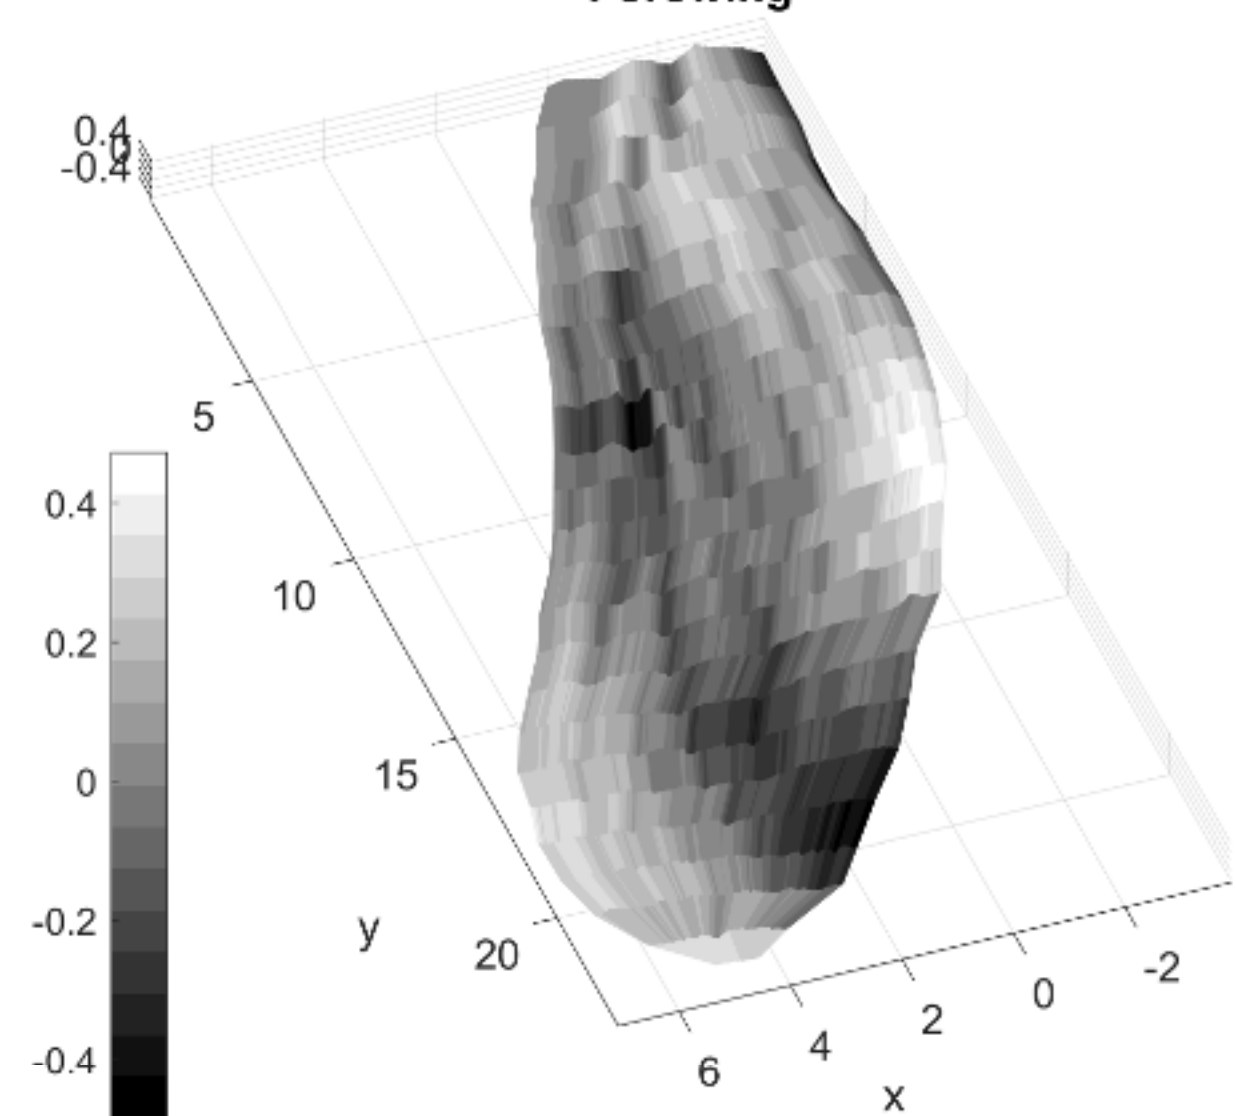

## Hind wing

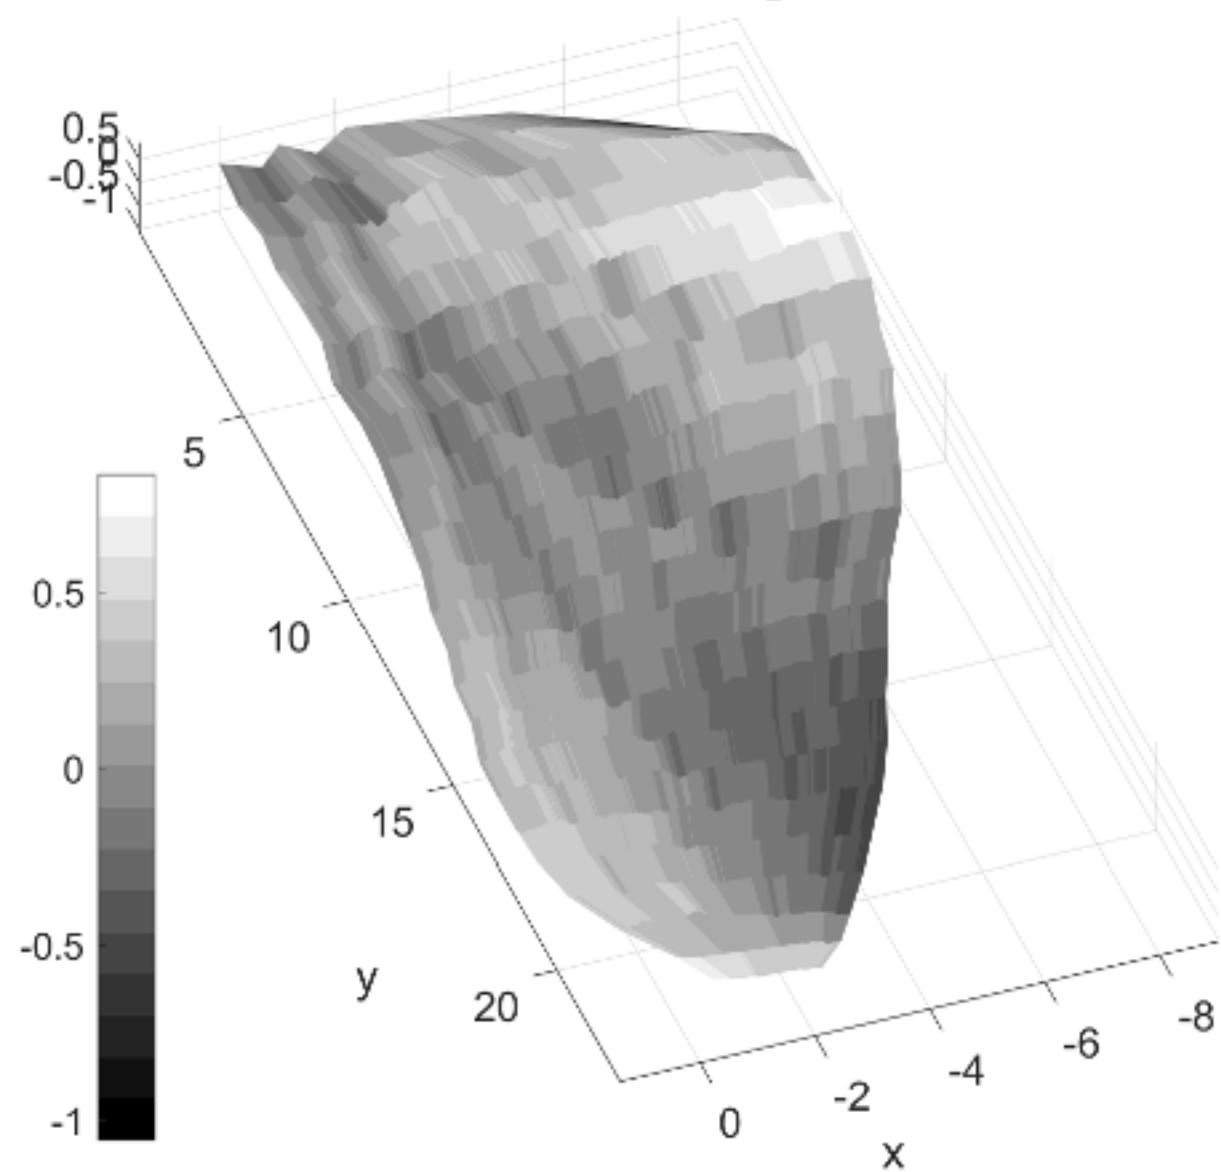

# Sympetrum rubicundulum-F3-museum

## Forewing

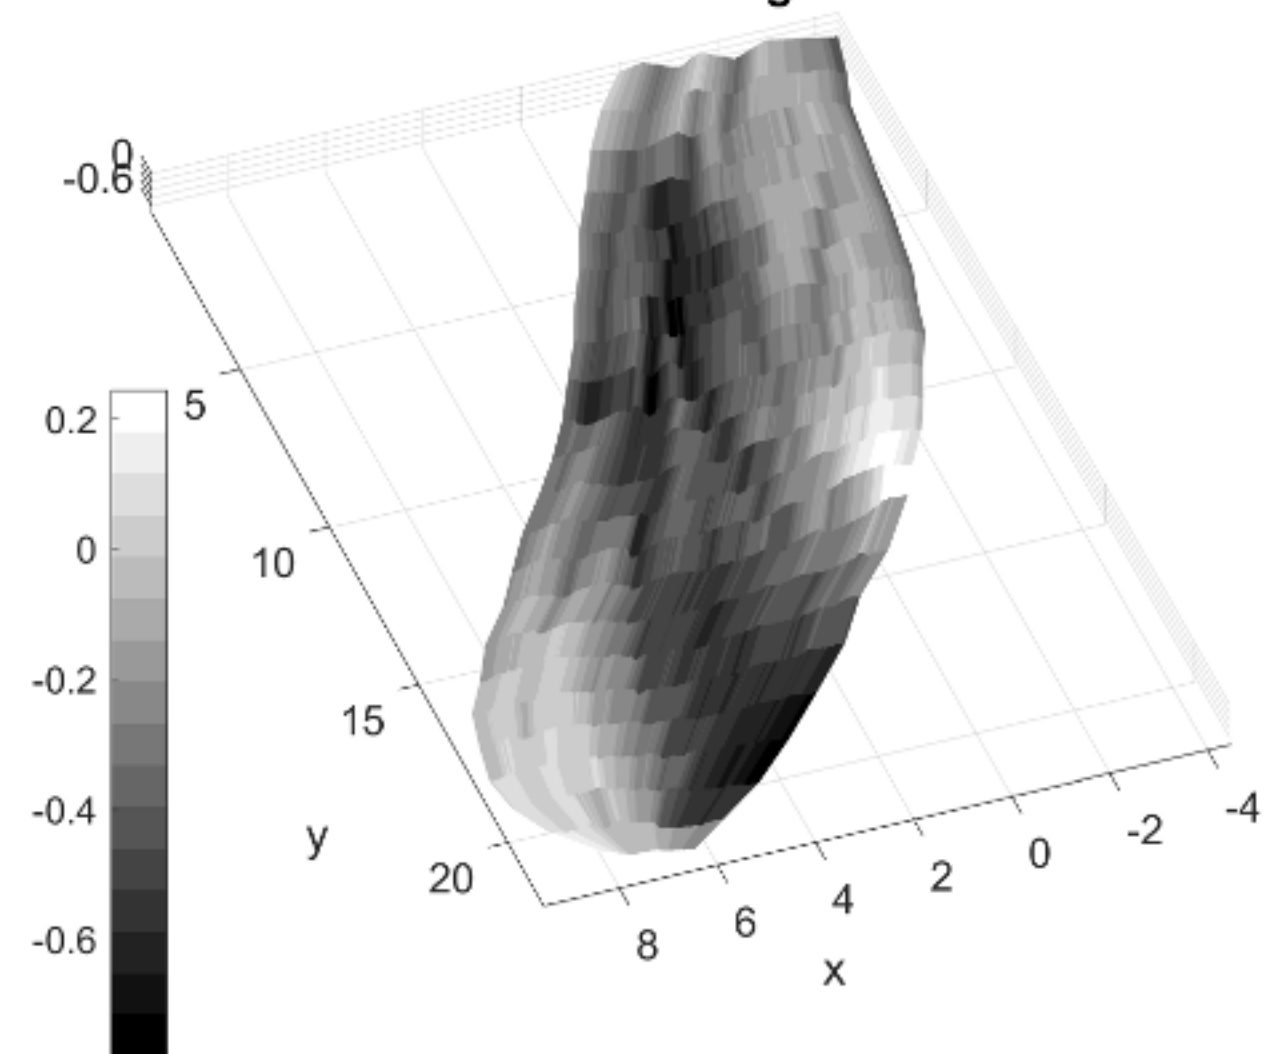

## Hind wing

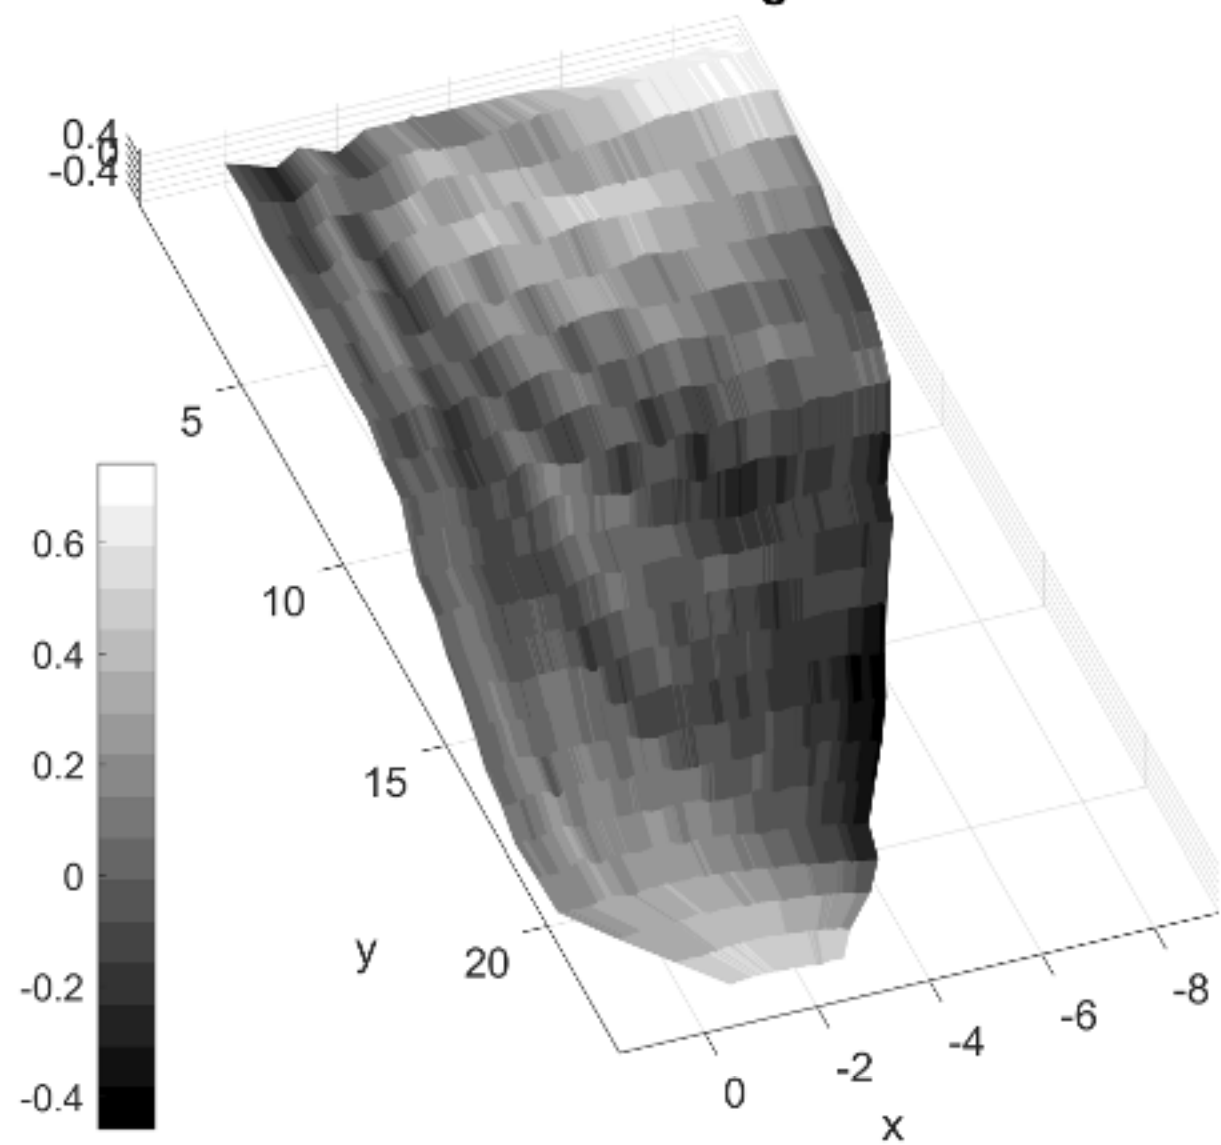

# Sympetrum rubicundulum-M1-museum

## Forewing

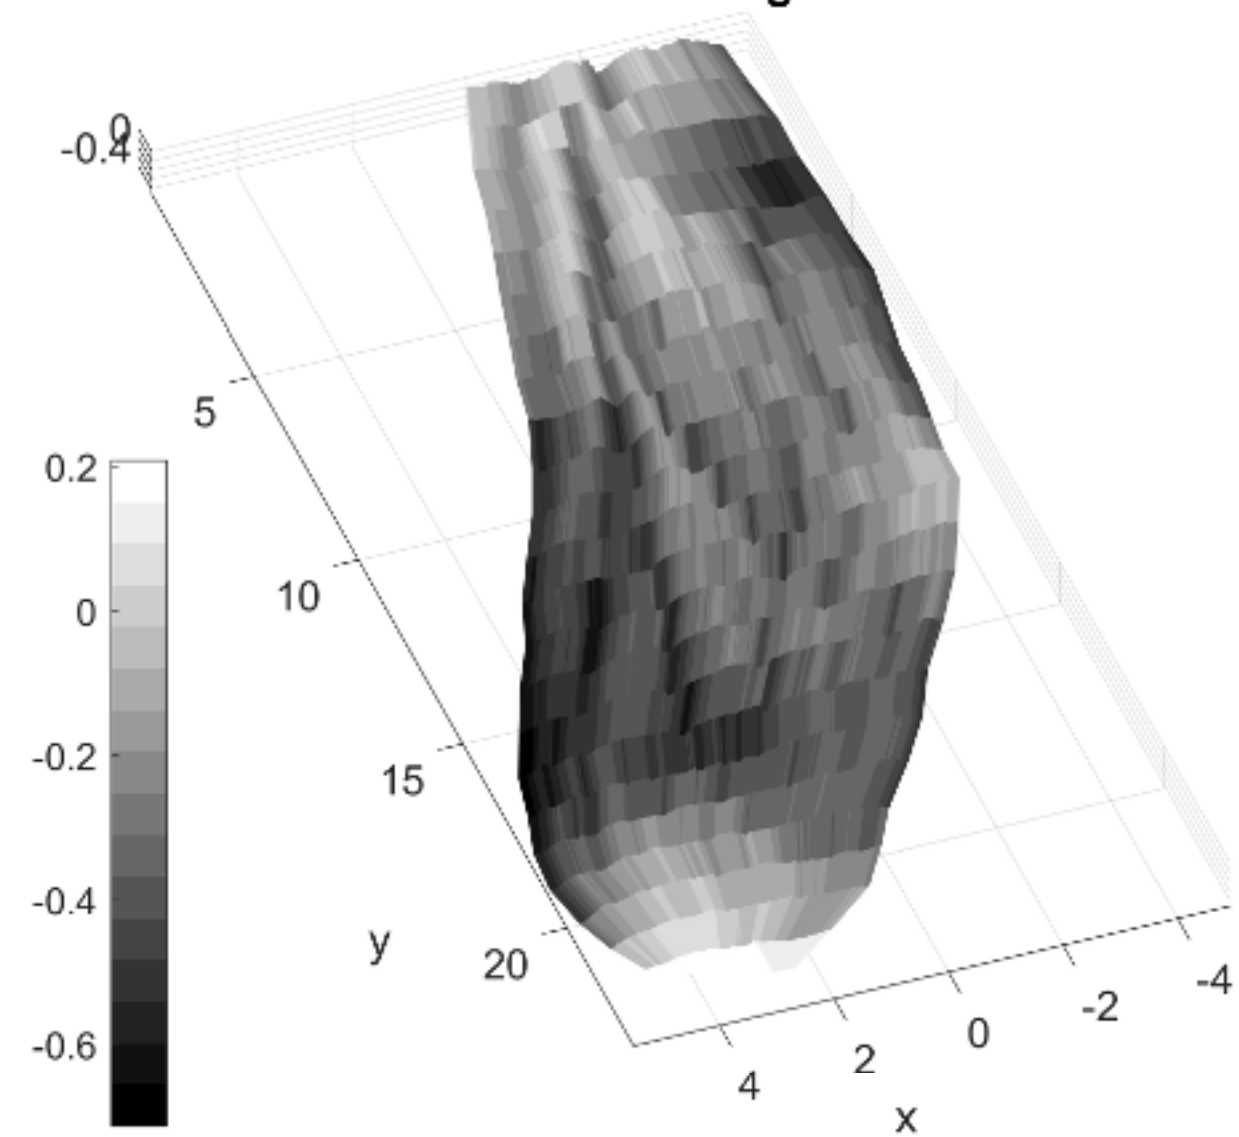

## Hind wing

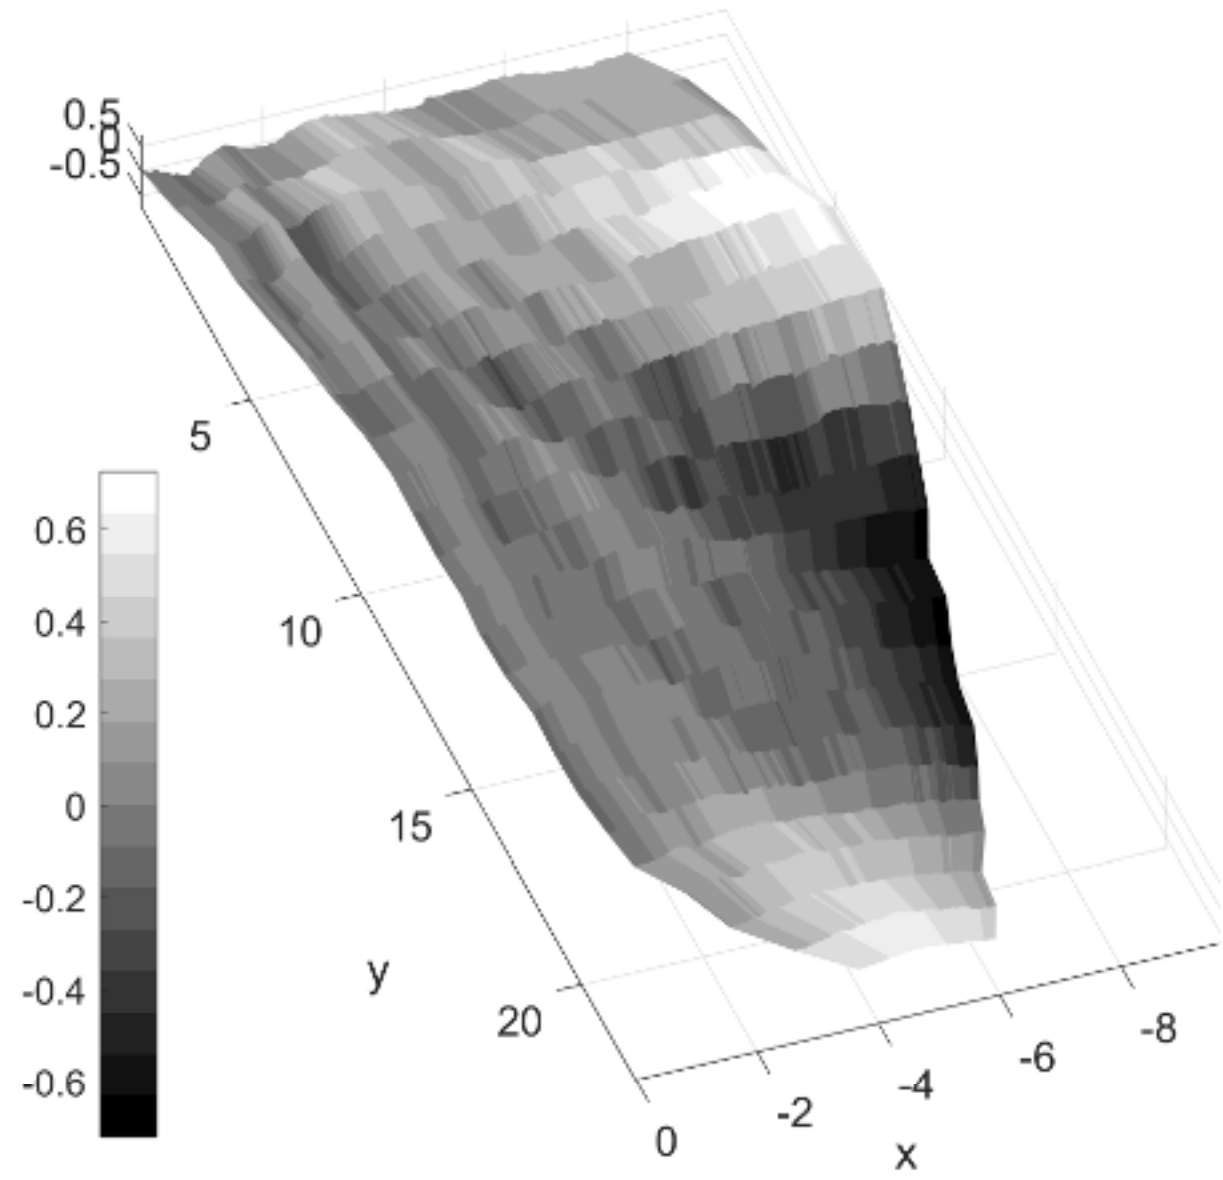

# Sympetrum rubicundulum-M2-museum

## Forewing

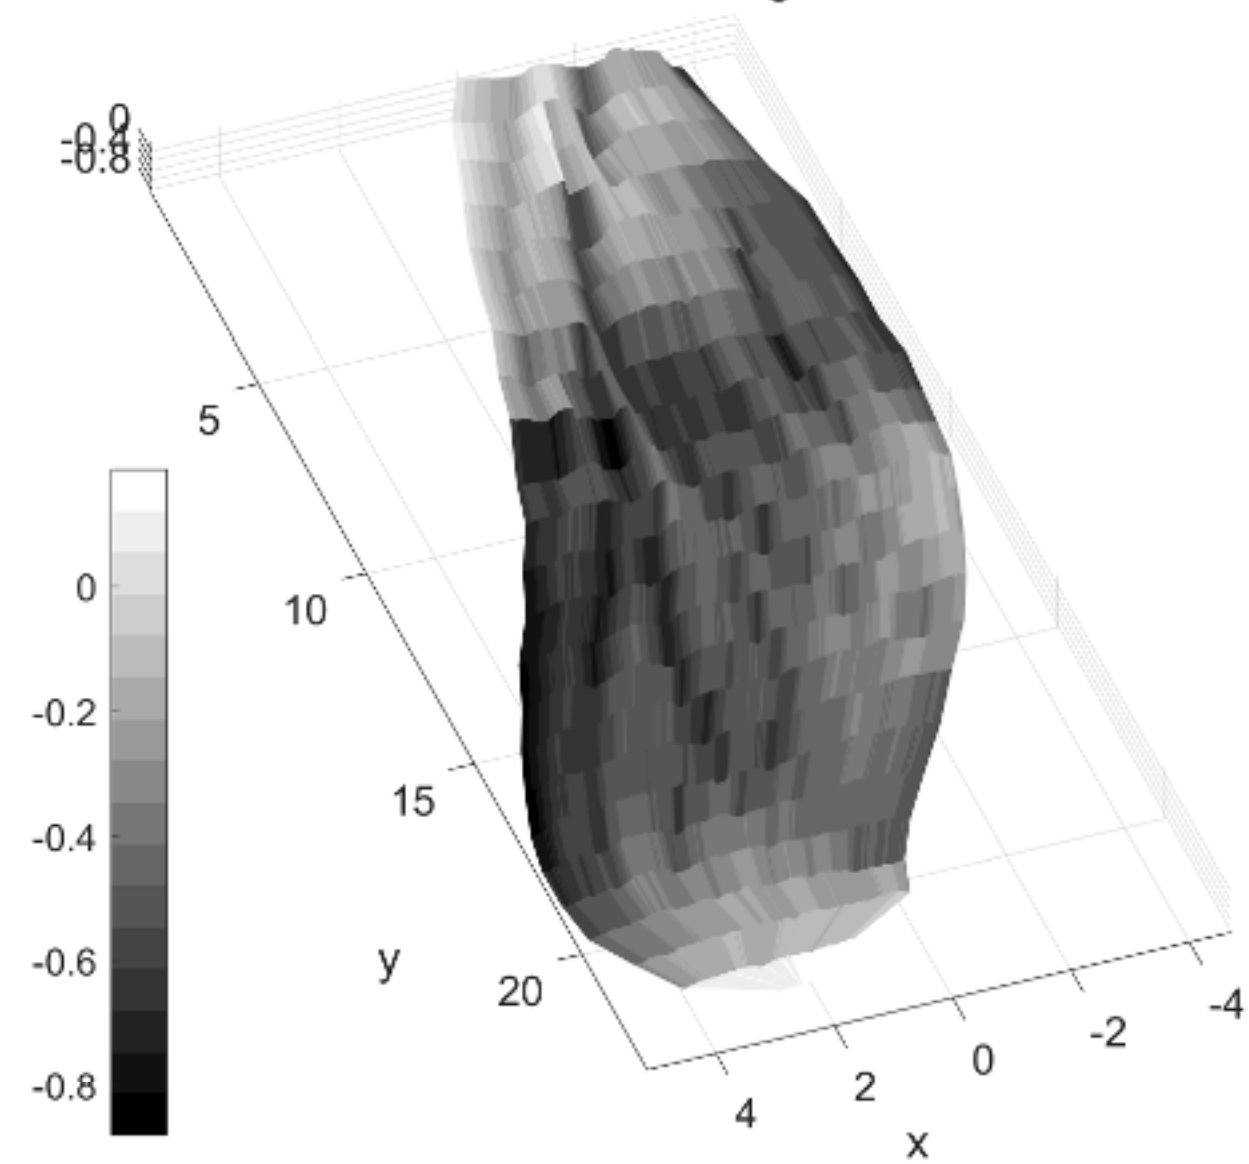

## Hind wing

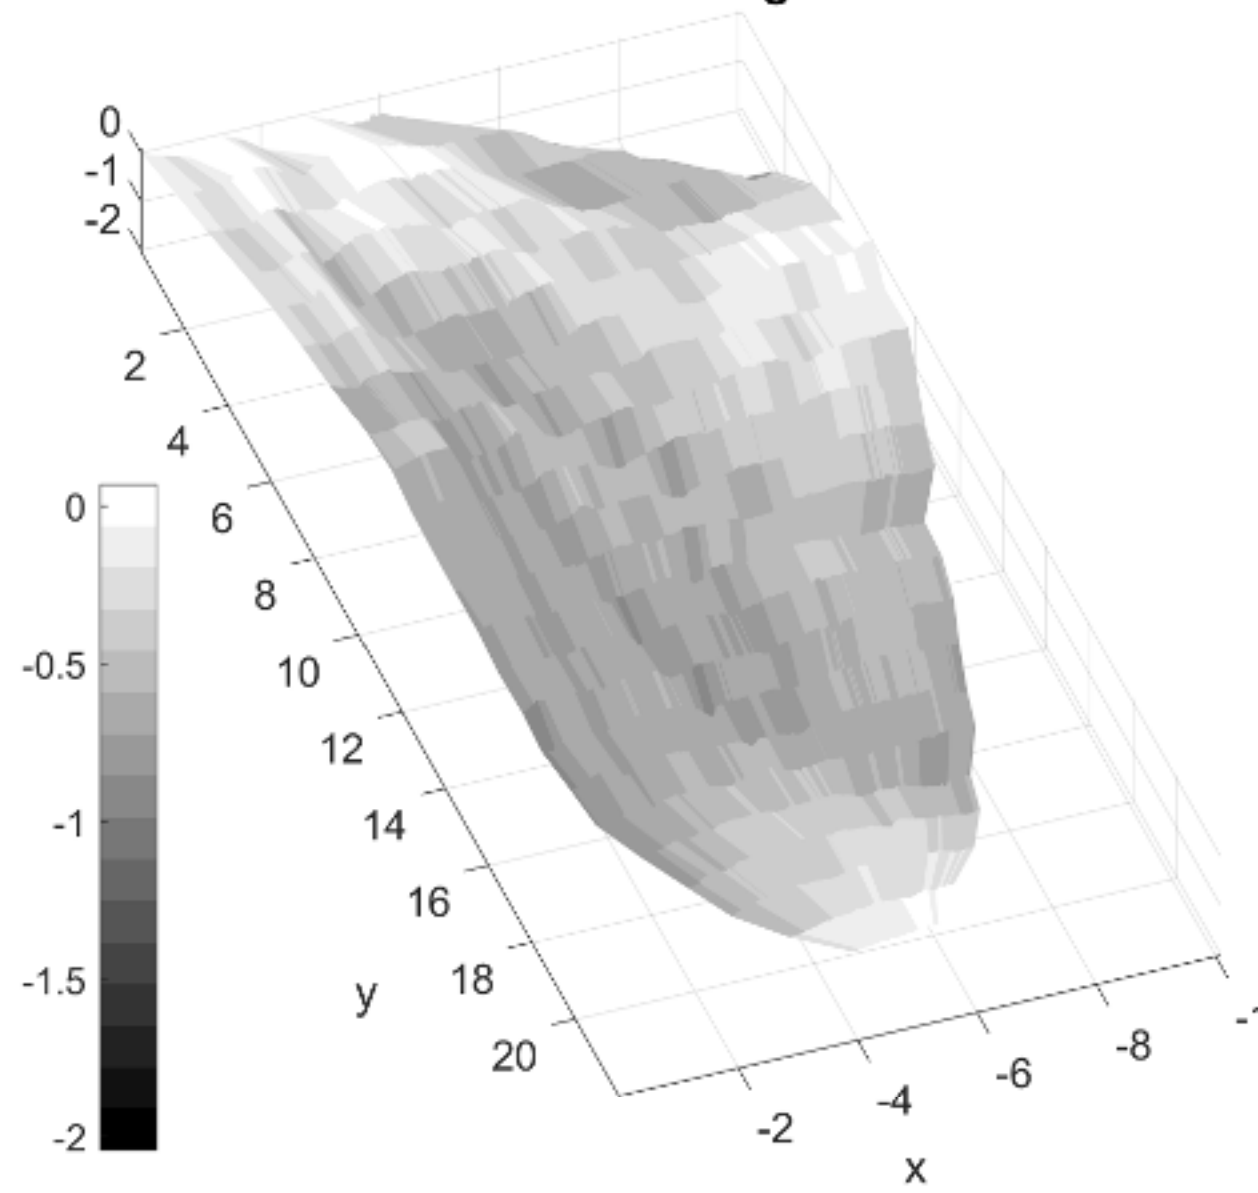

# Sympetrum rubicundulum-M3-museum

## Forewing

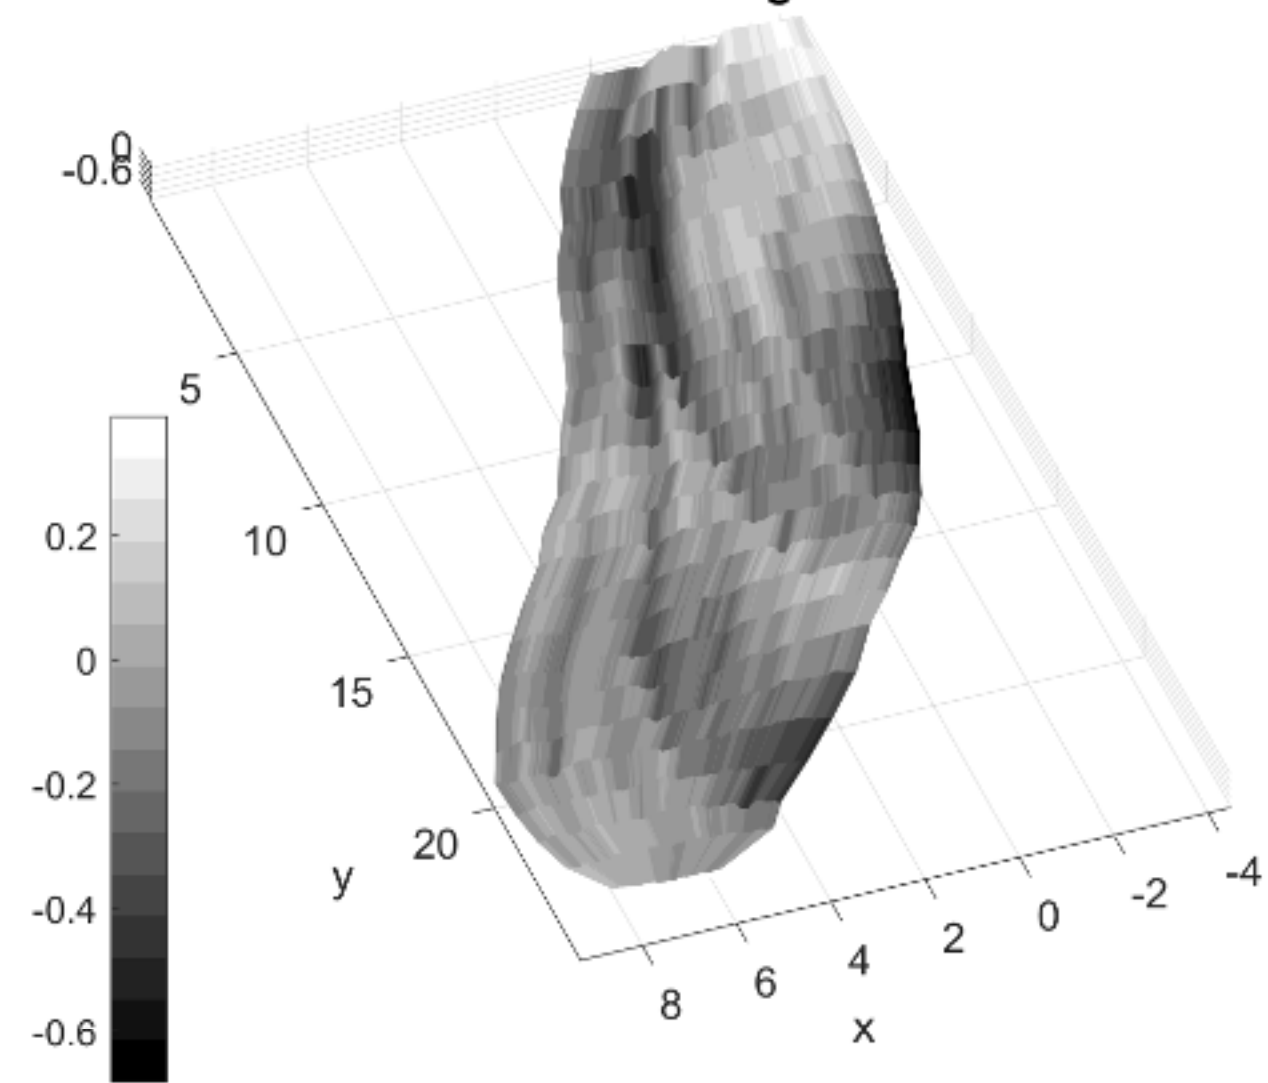

## Hind wing

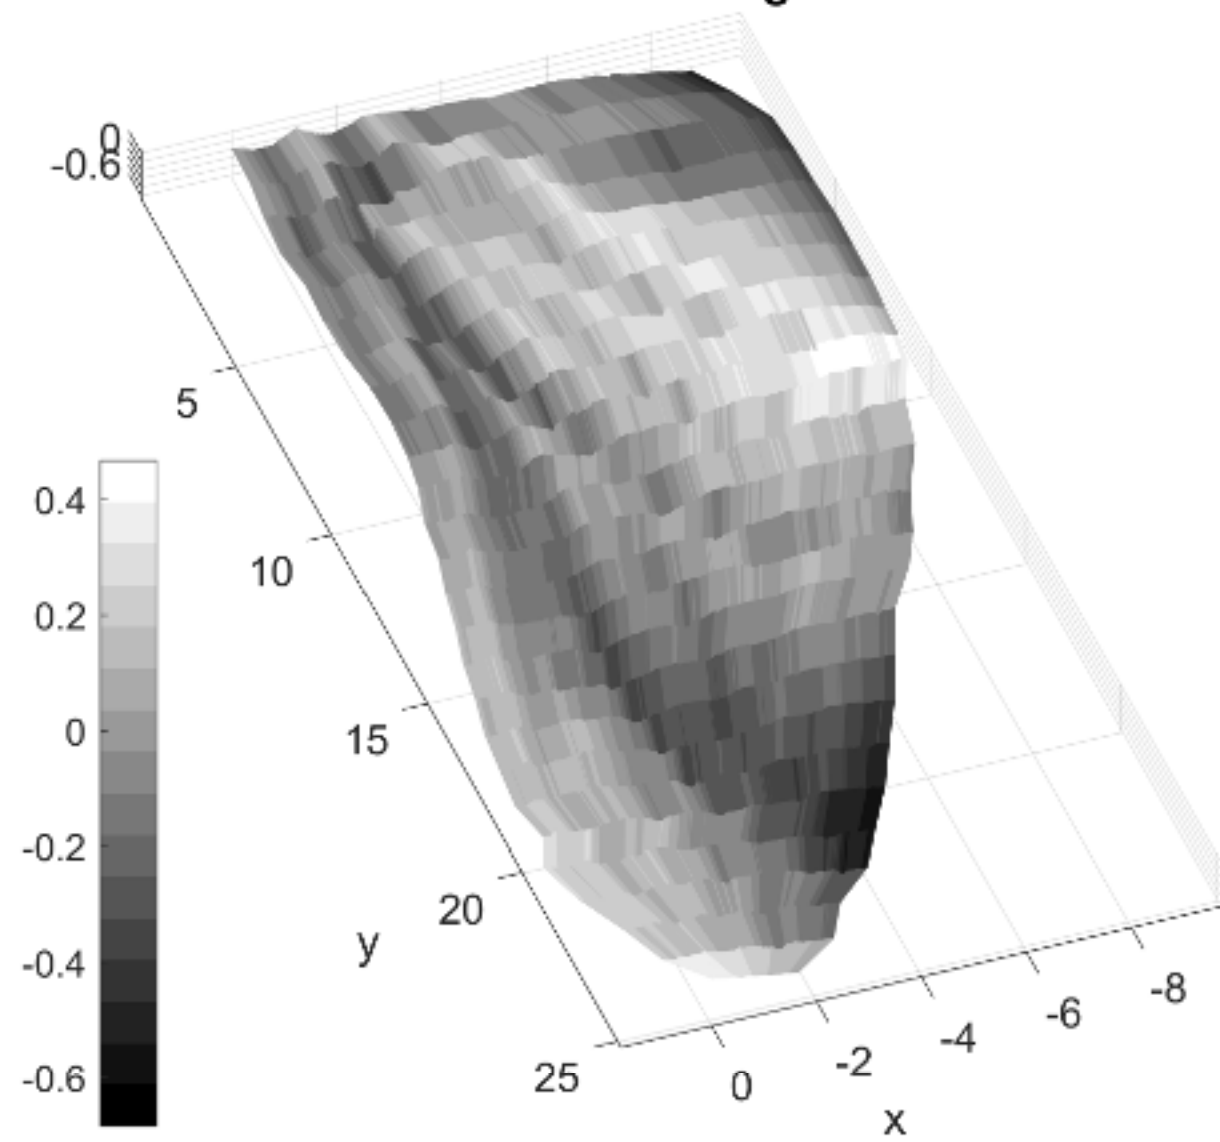

# Sympetrum sanguineum-F1-museum

## Forewing

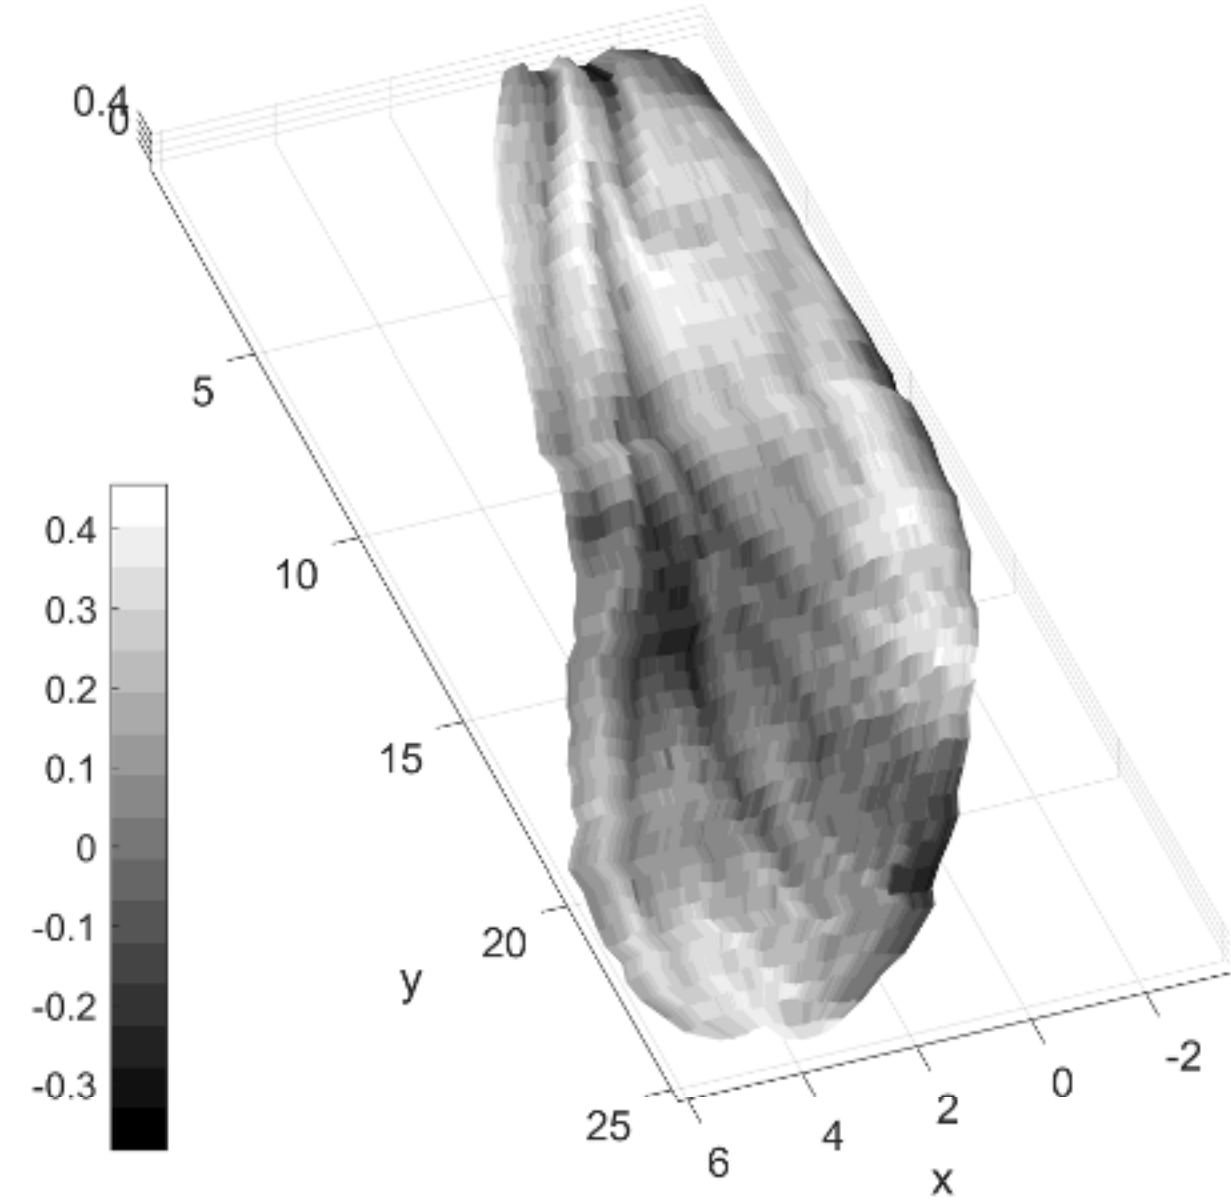

## Hind wing

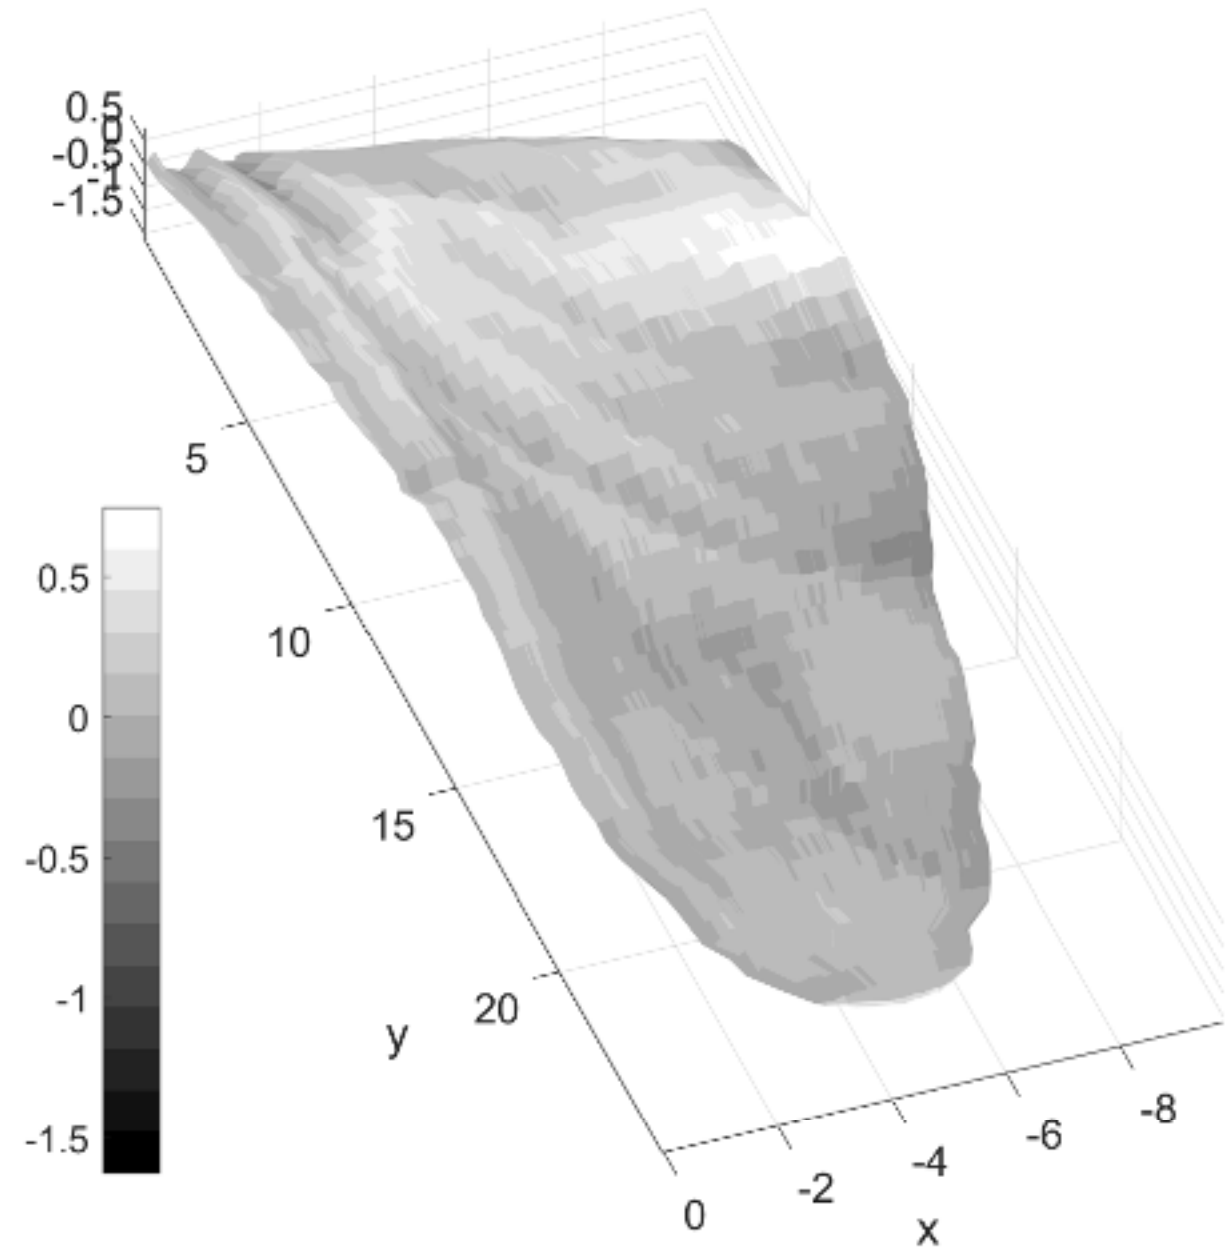

# Sympetrum sanguineum-F2-museum

## Forewing

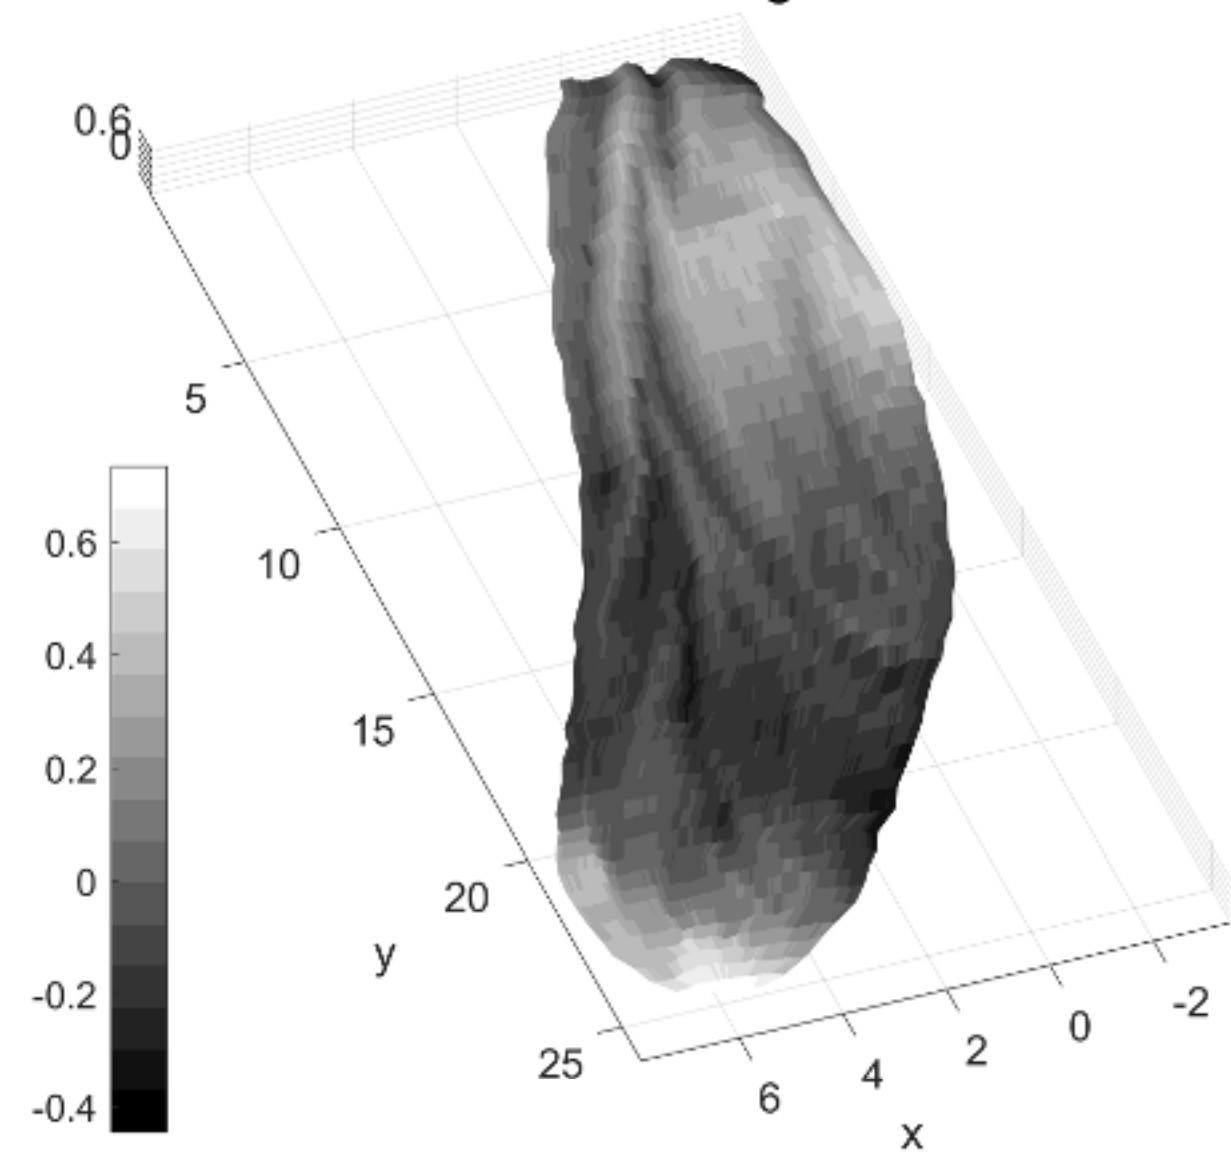

## Hind wing

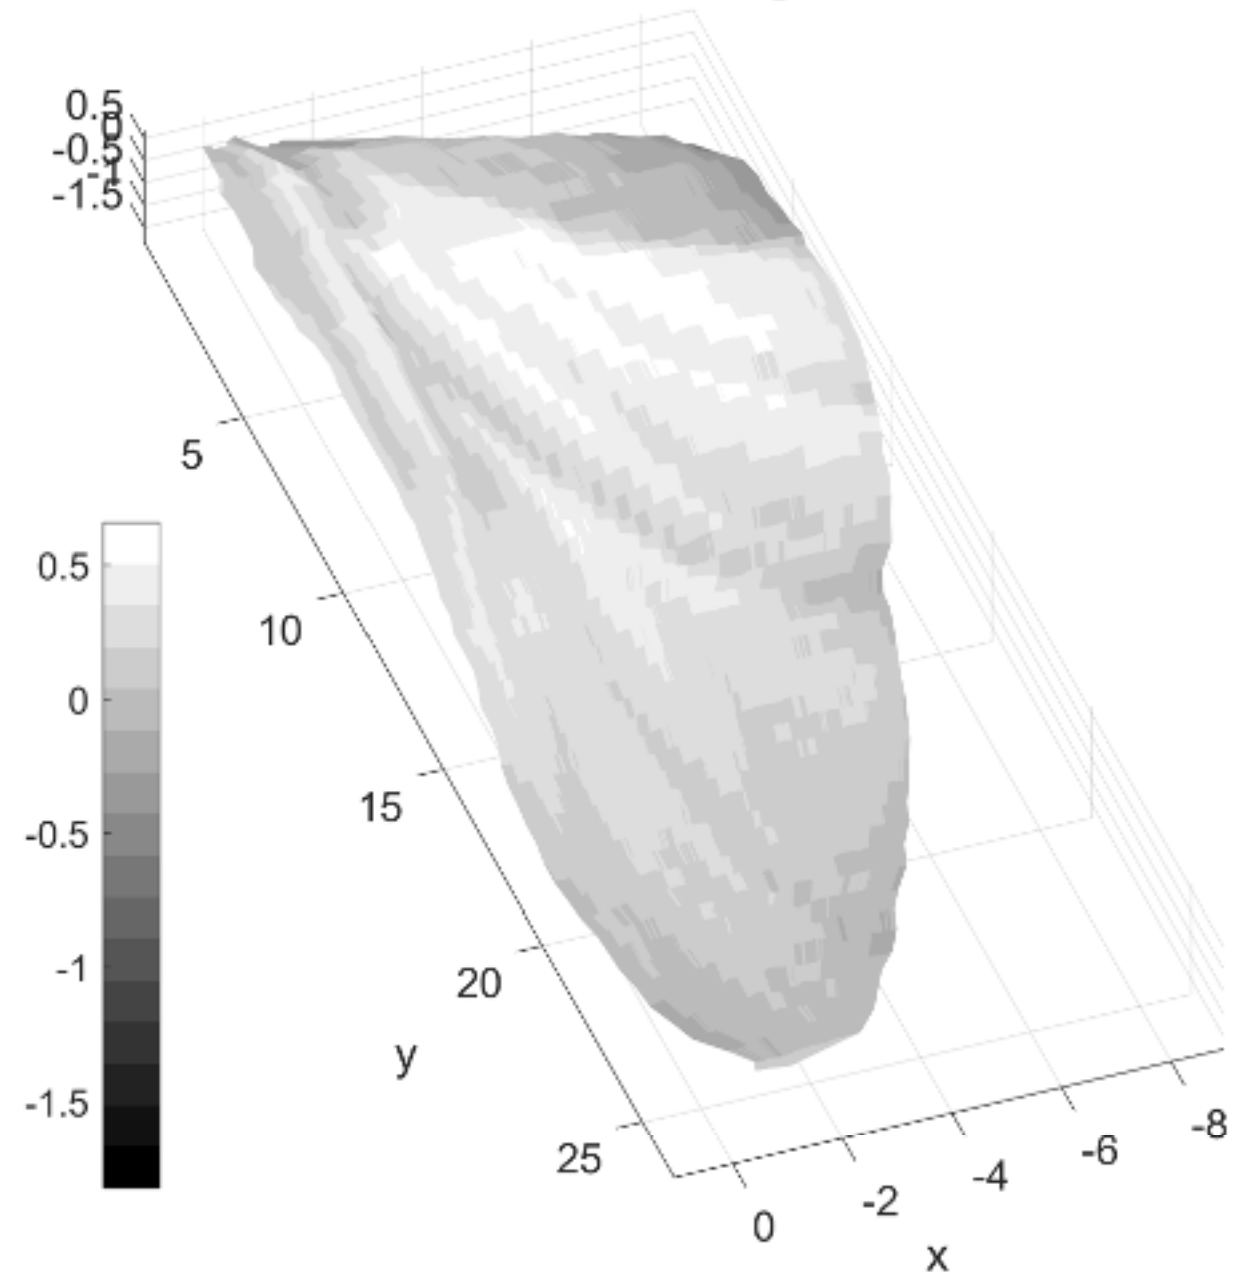

# Sympetrum sanguineum-M1-museum

## Forewing

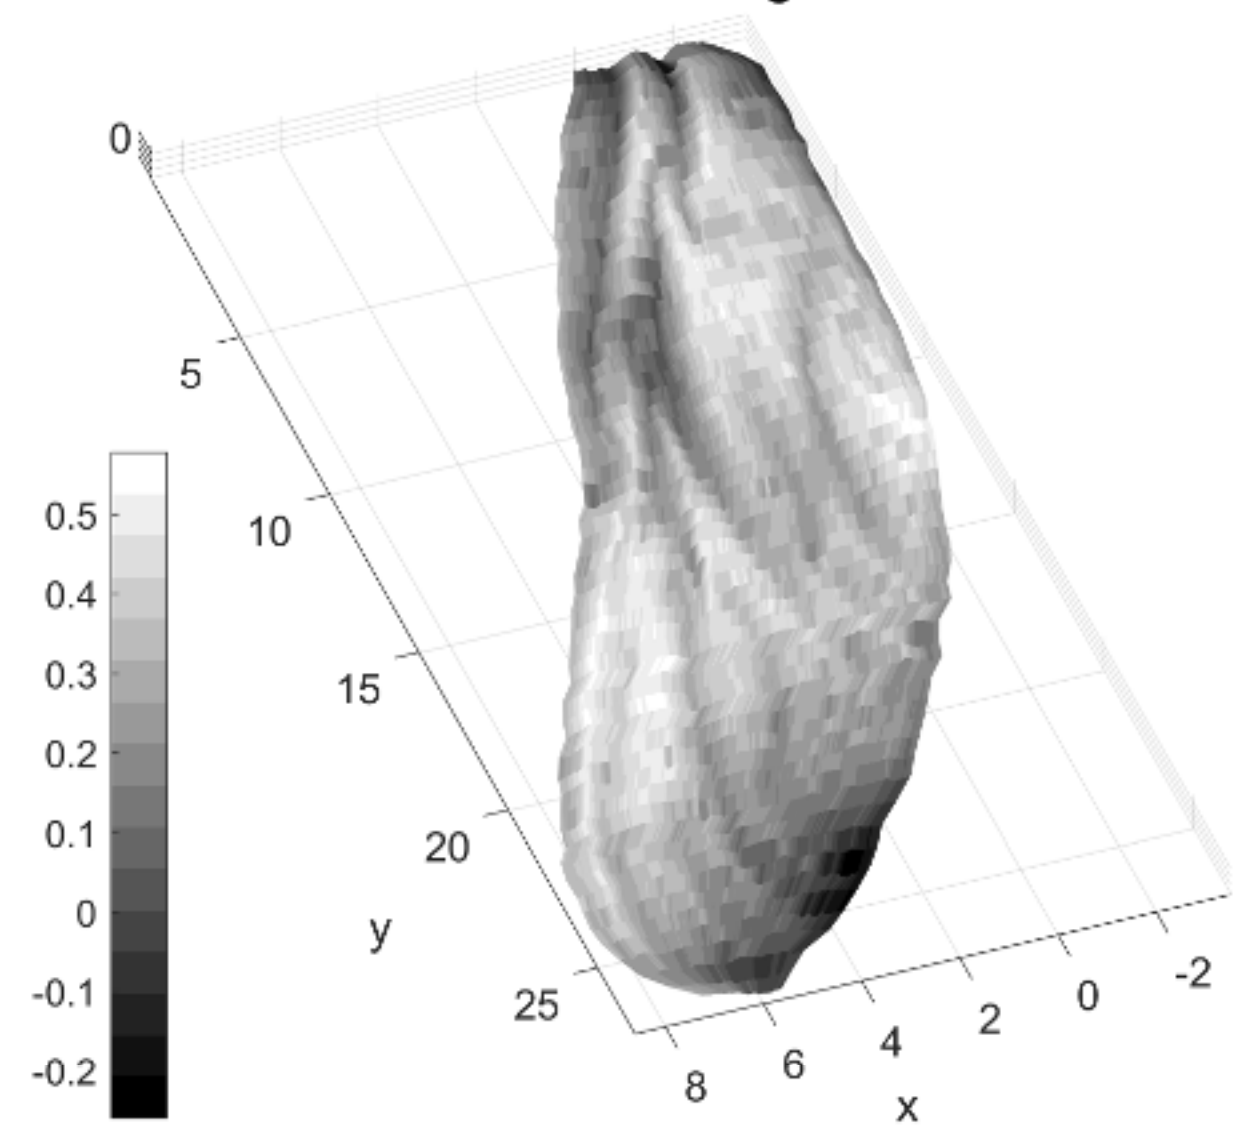

## Hind wing

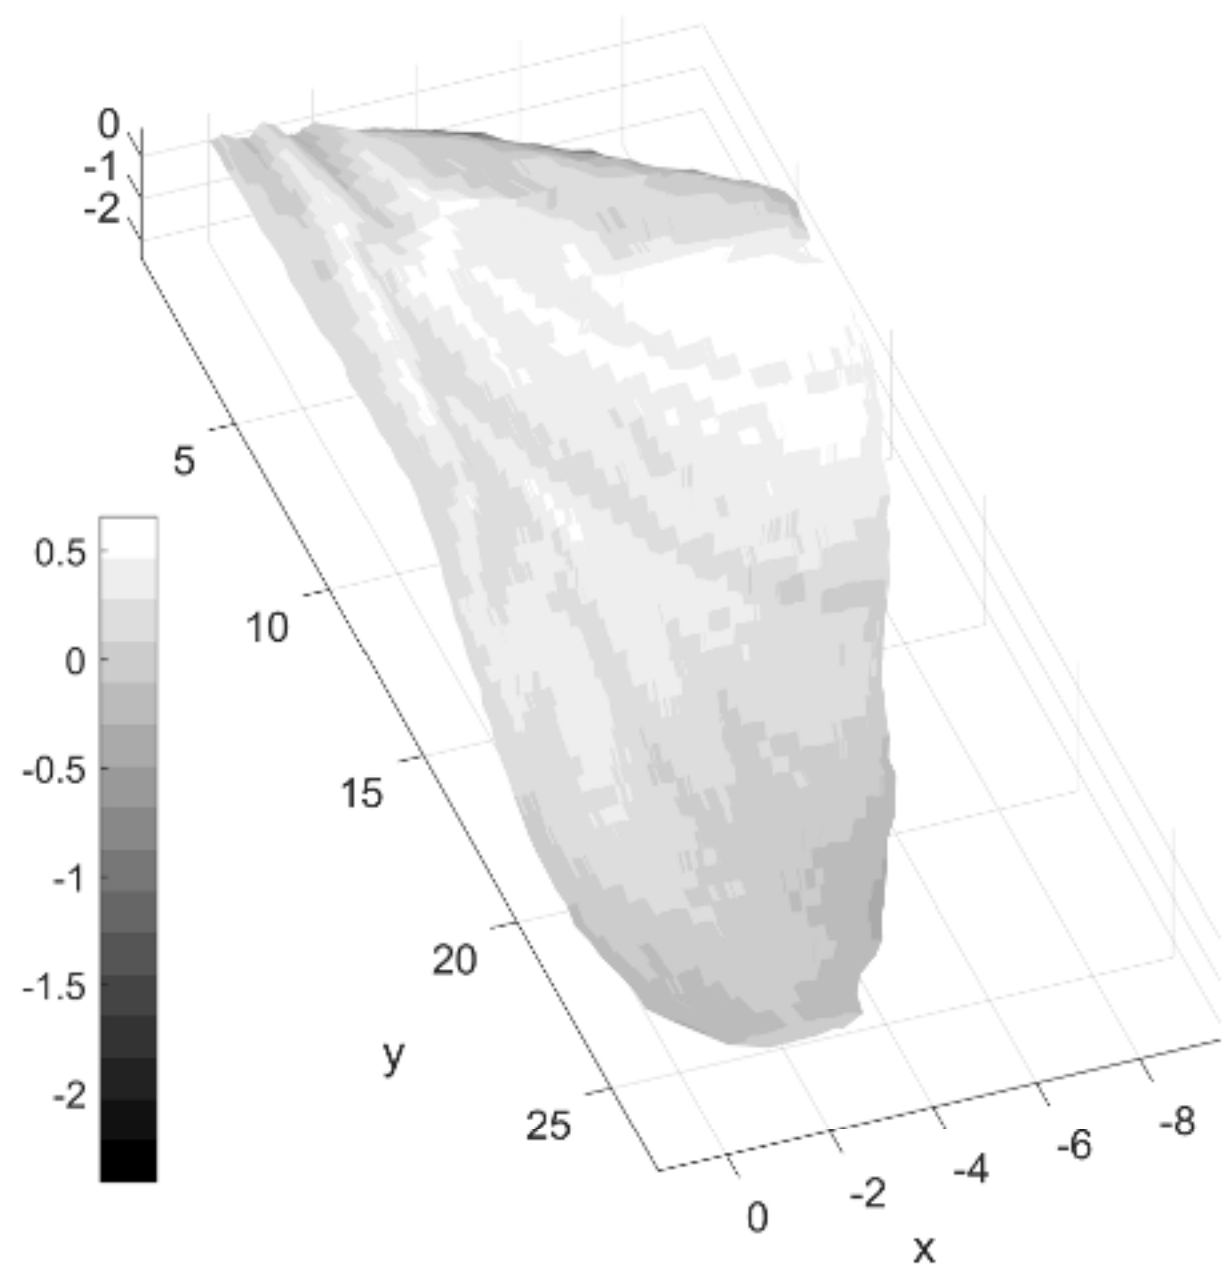



# Sympetrum sanguineum-M2-museum

## Forewing

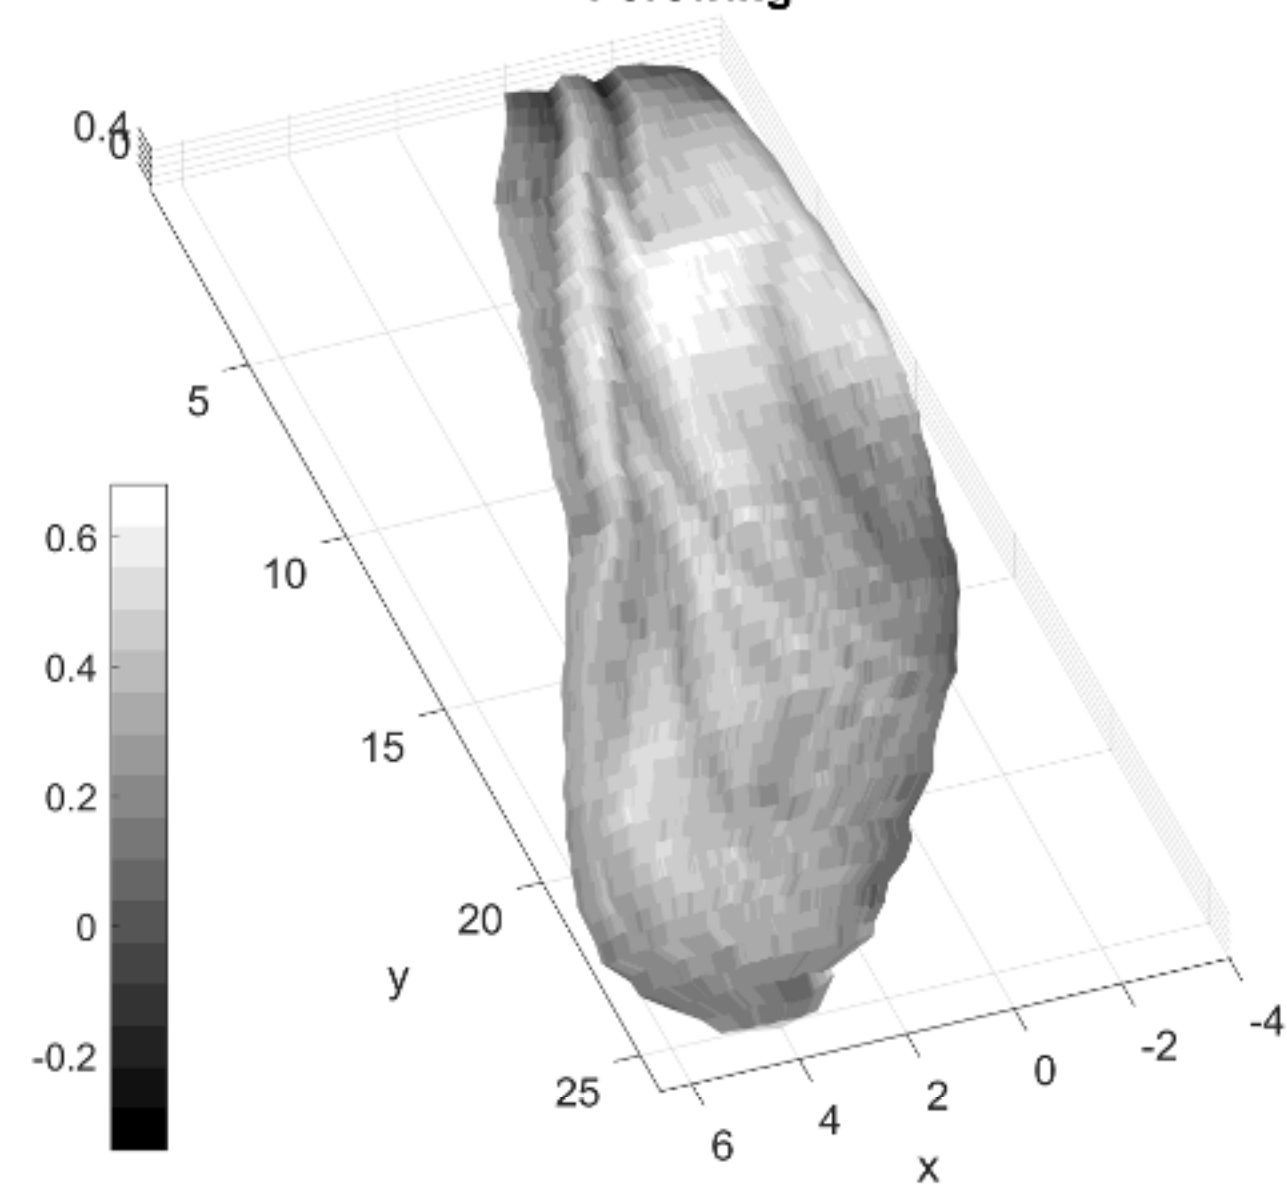

## Hind wing

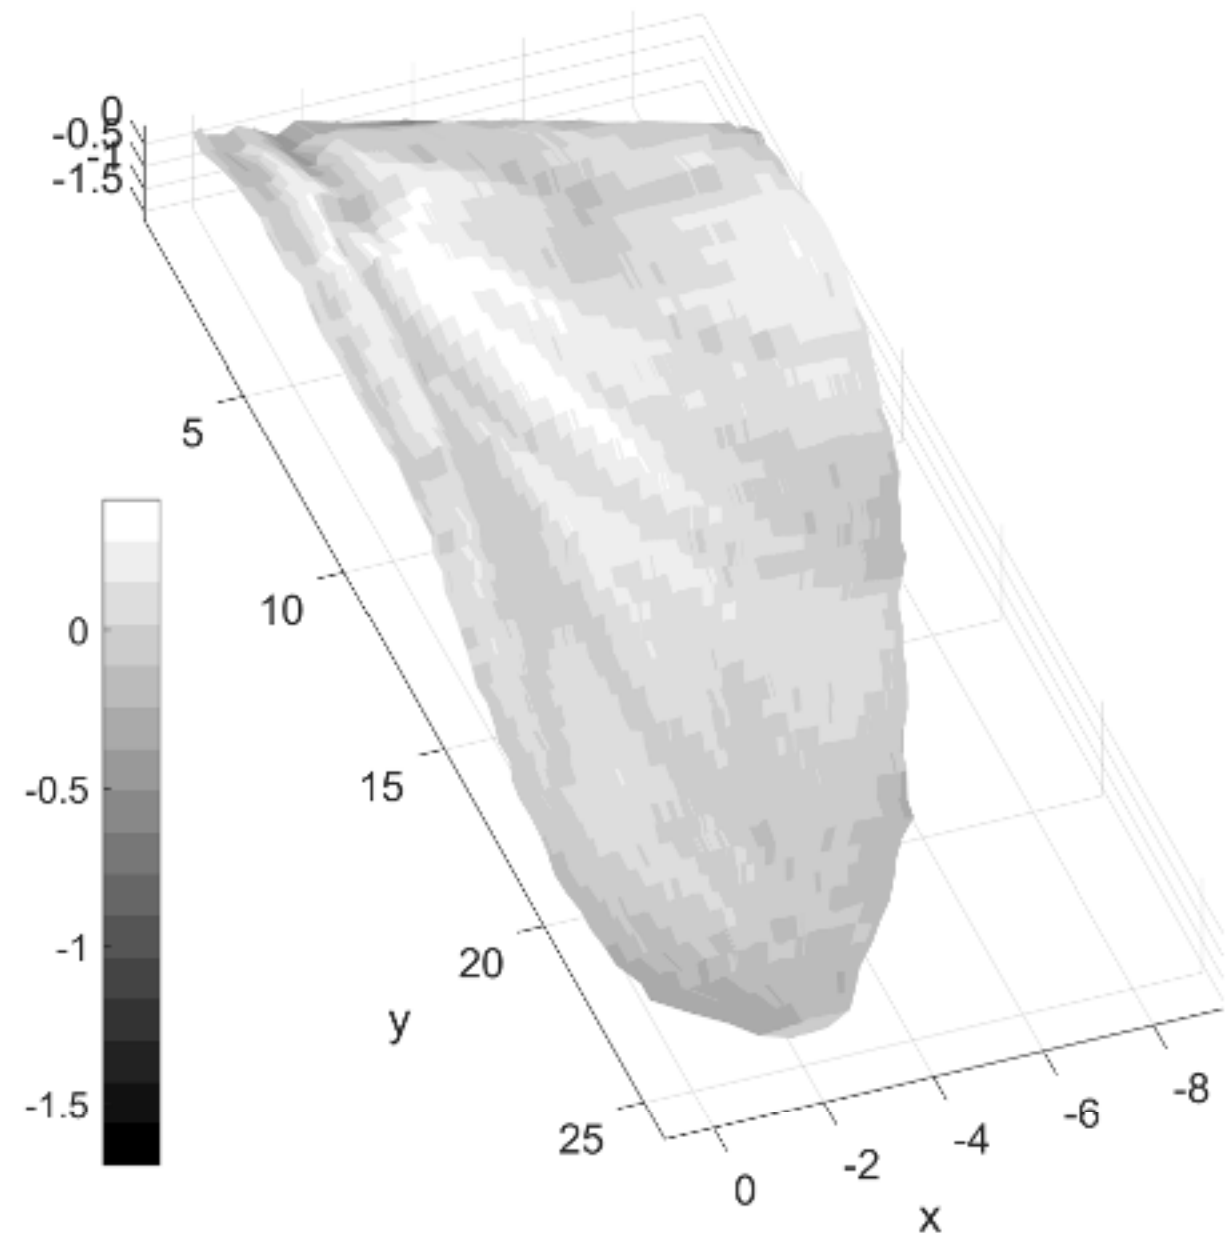

# Sympetrum sanguineum-M3-fresh

## Forewing

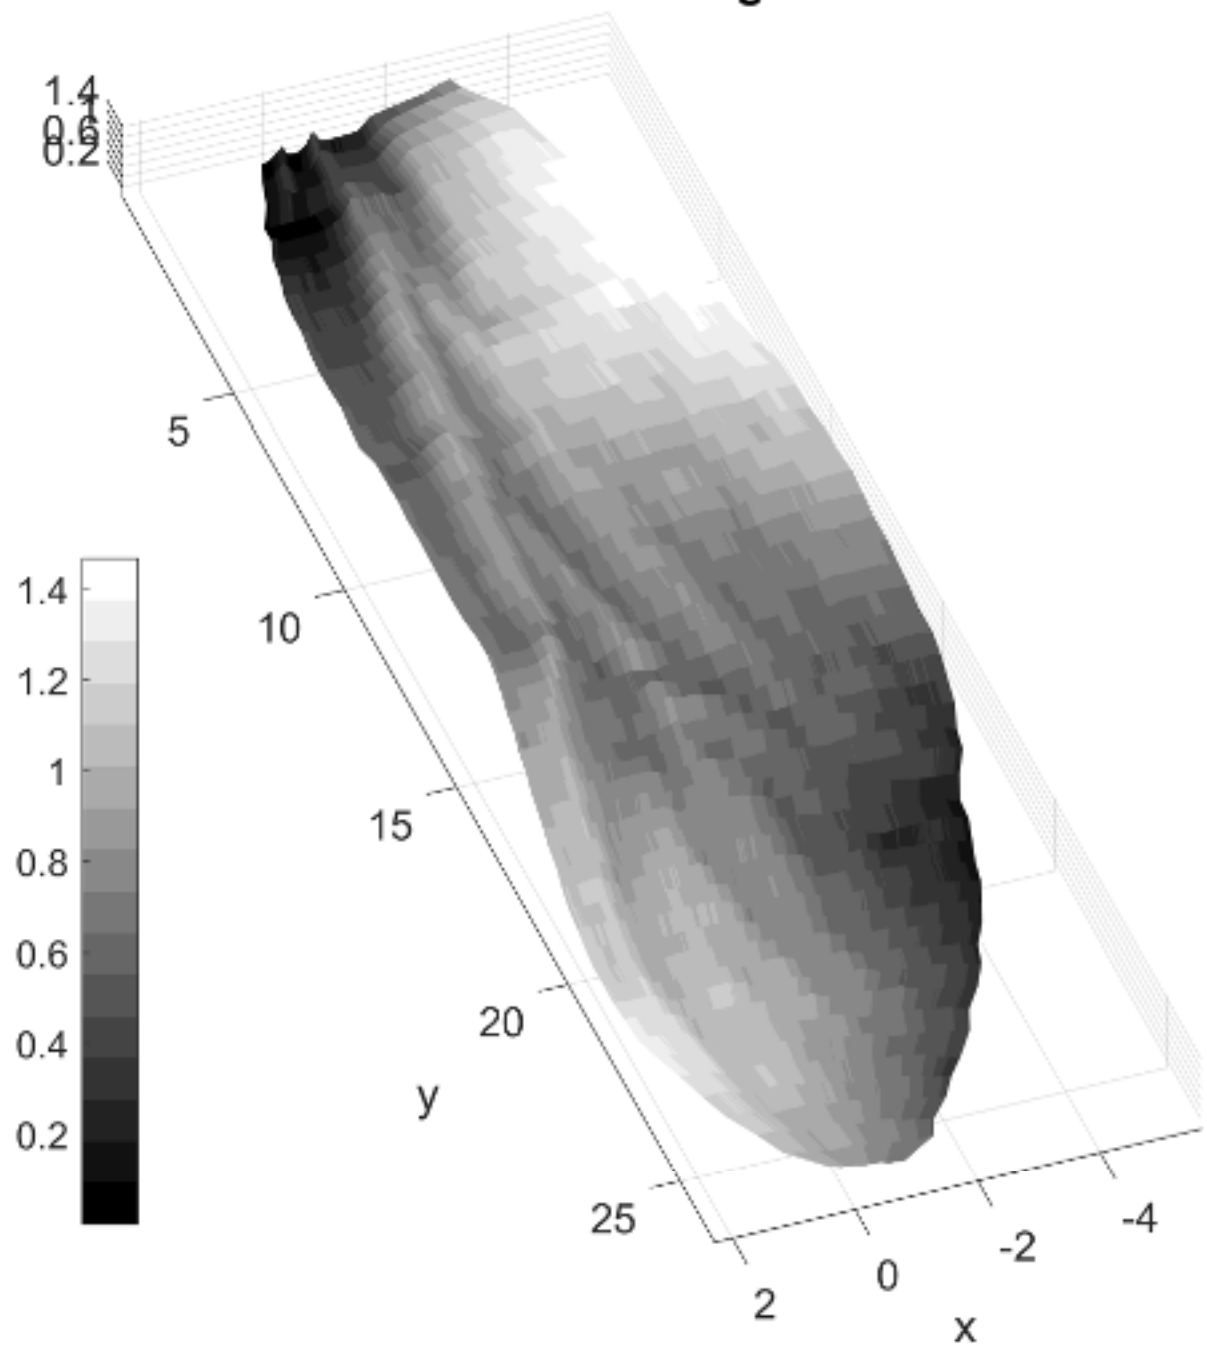

## Hind wing

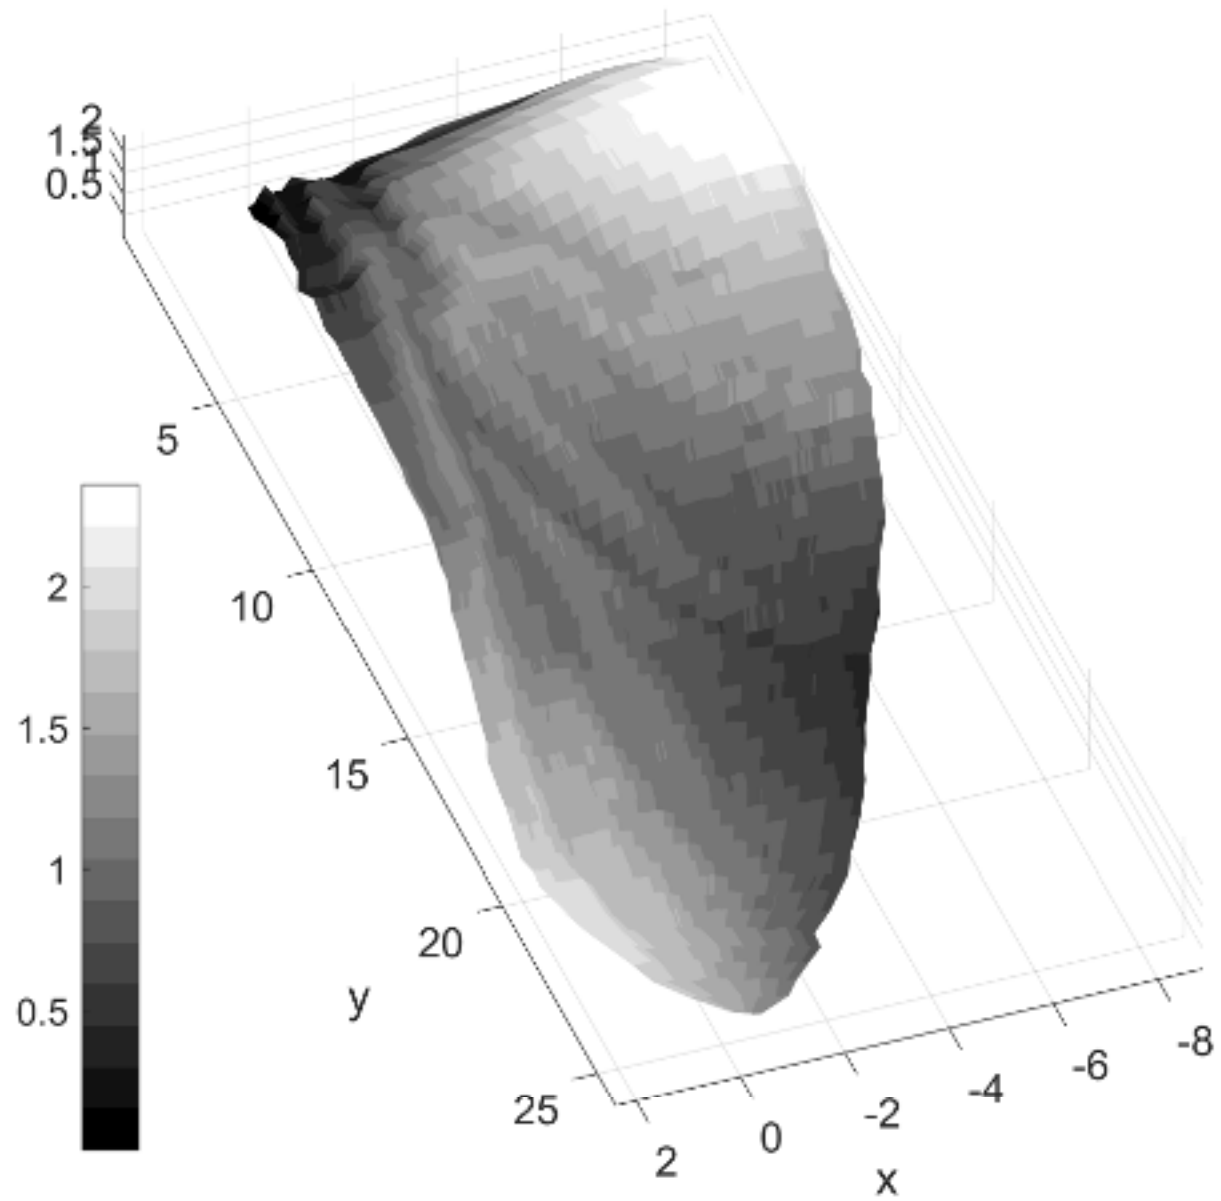

# Sympetrum striolatum-F1-fresh

## Forewing

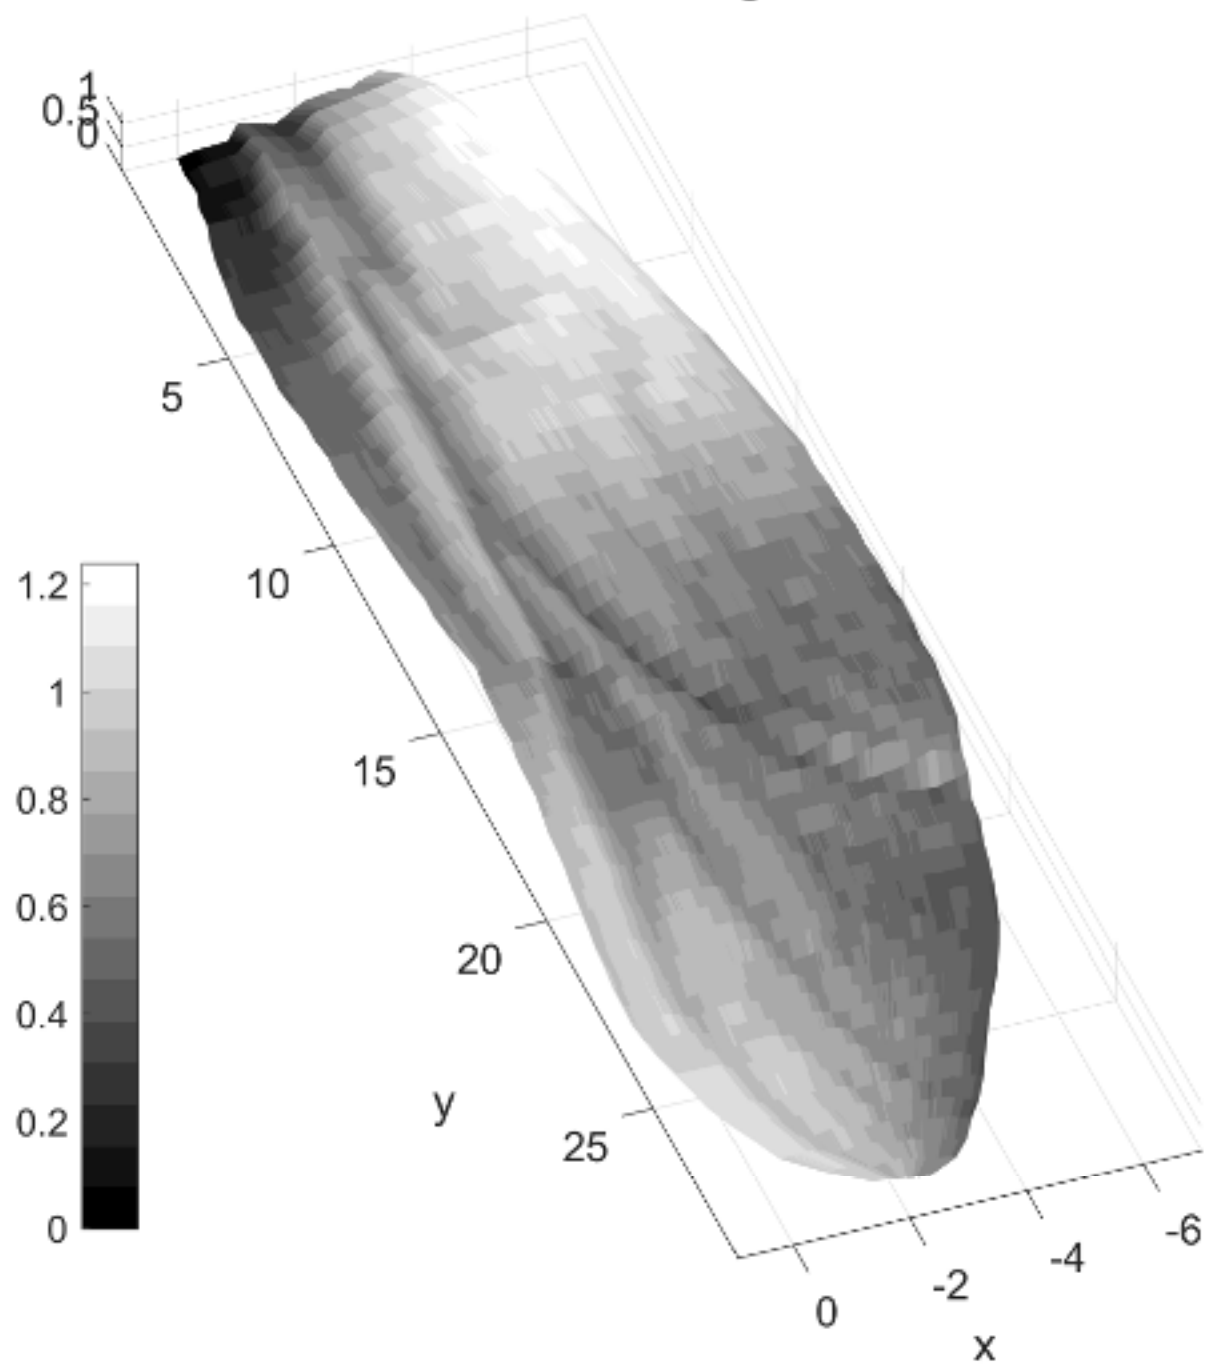

## Hind wing

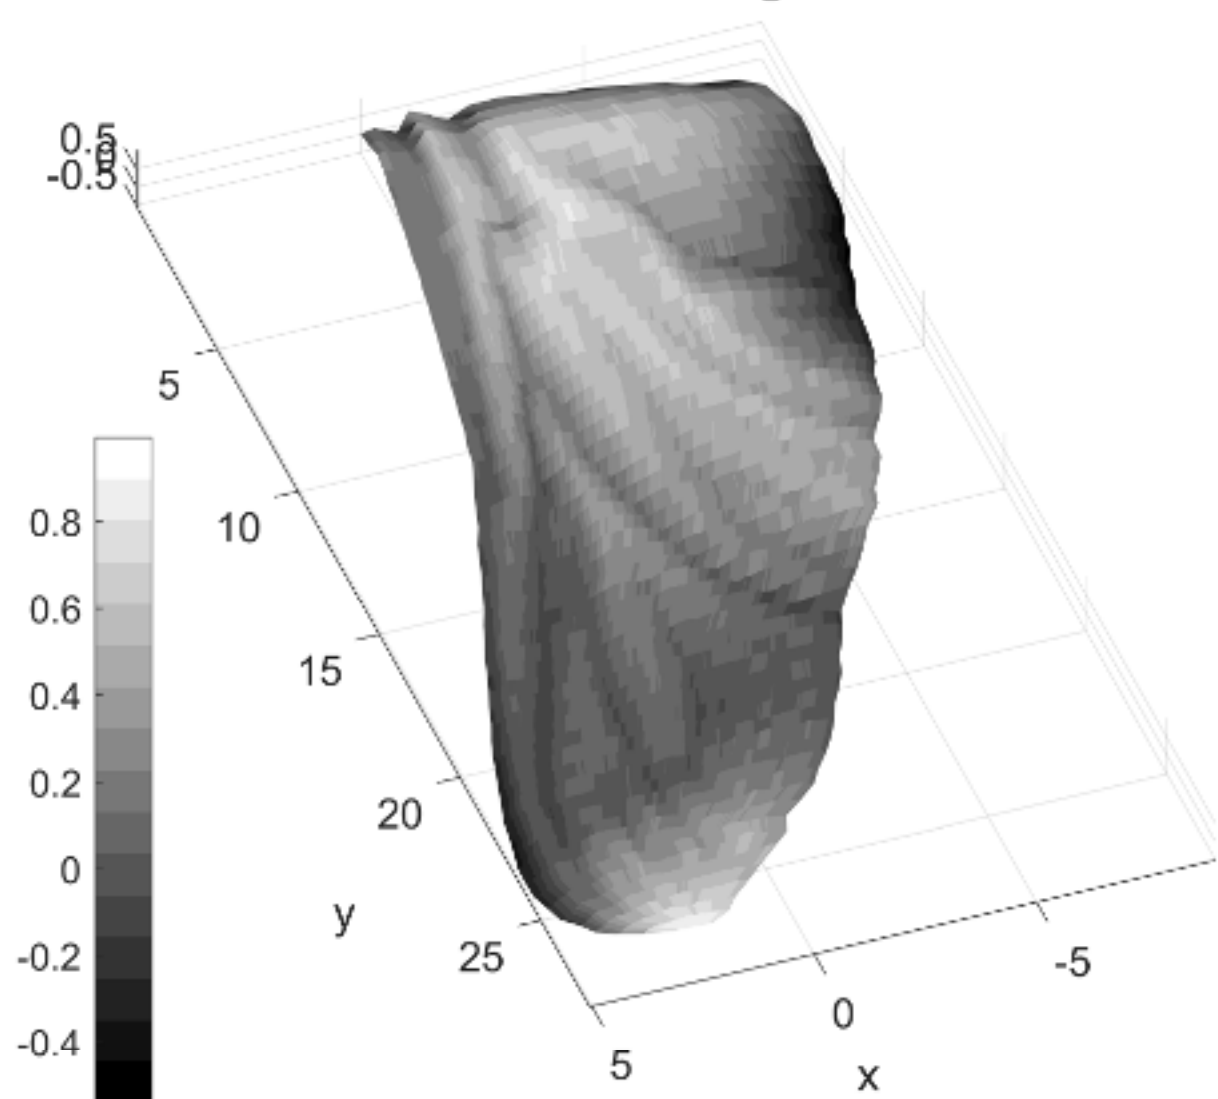

# Tholymis tillarga-F1-museum

## Forewing

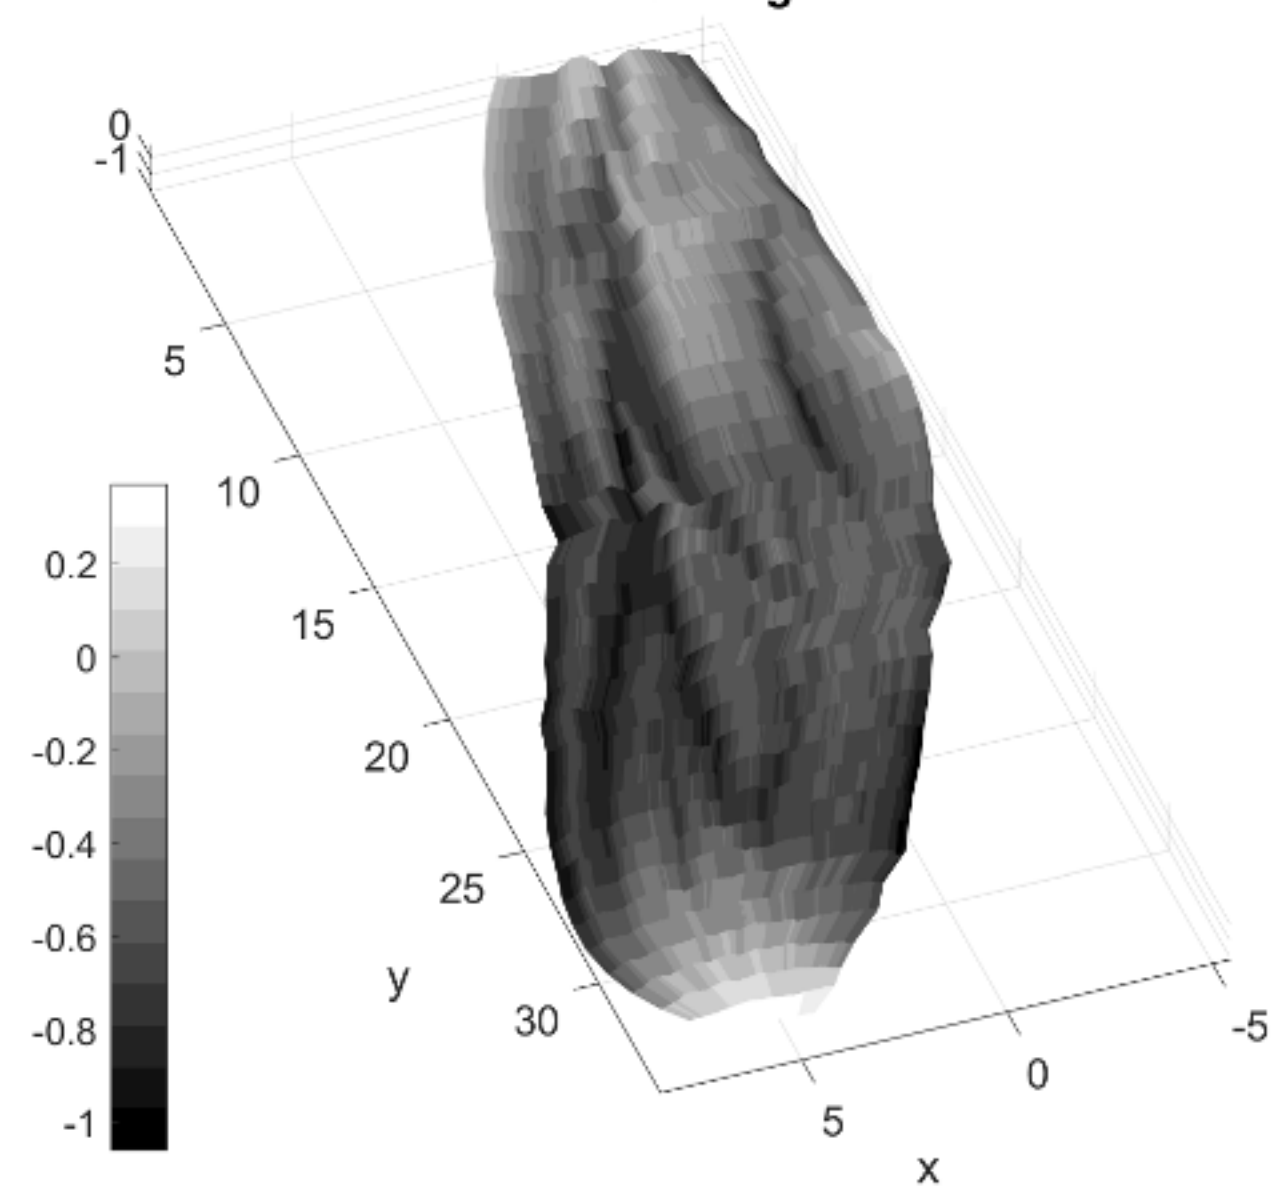

## Hind wing

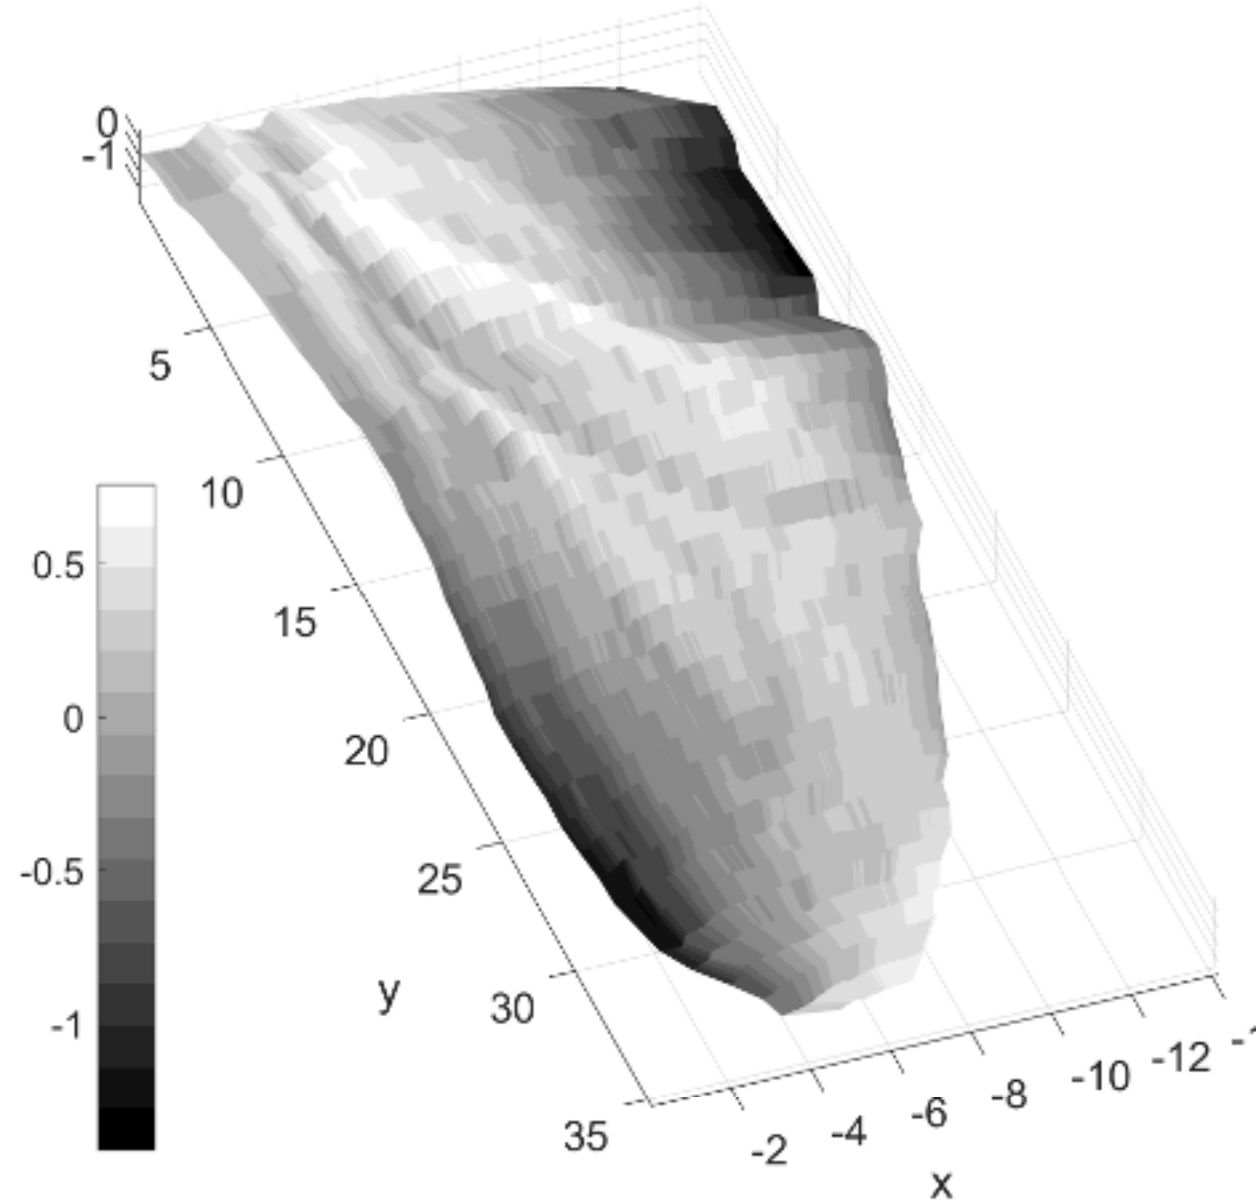

# Uropetala carovei-F1-museum

## Forewing

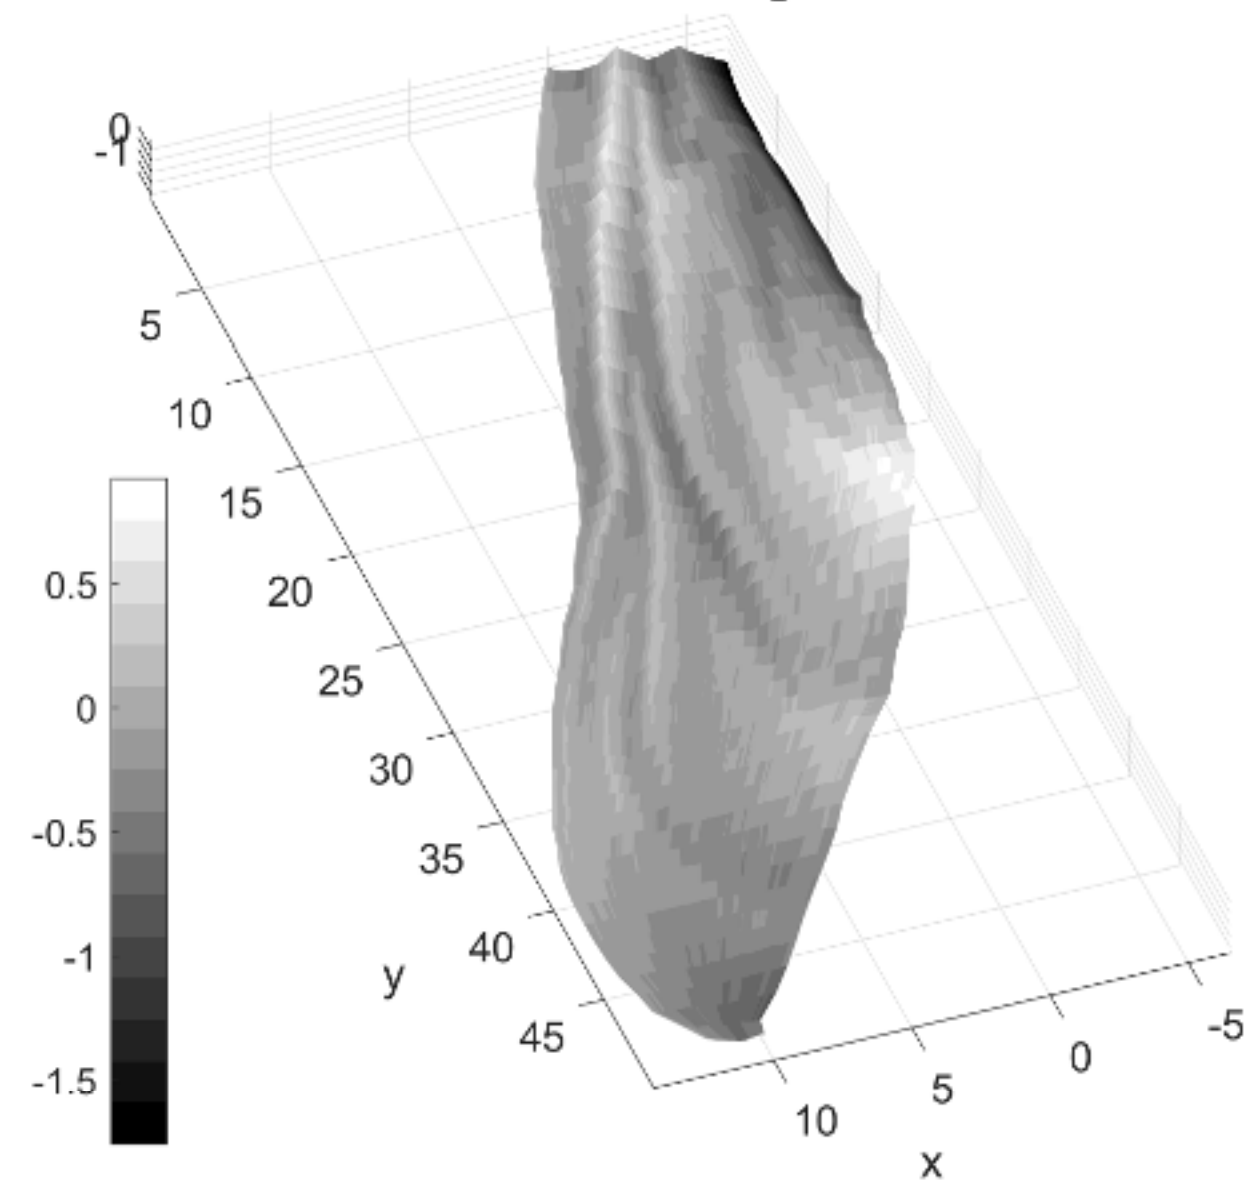

## Hind wing

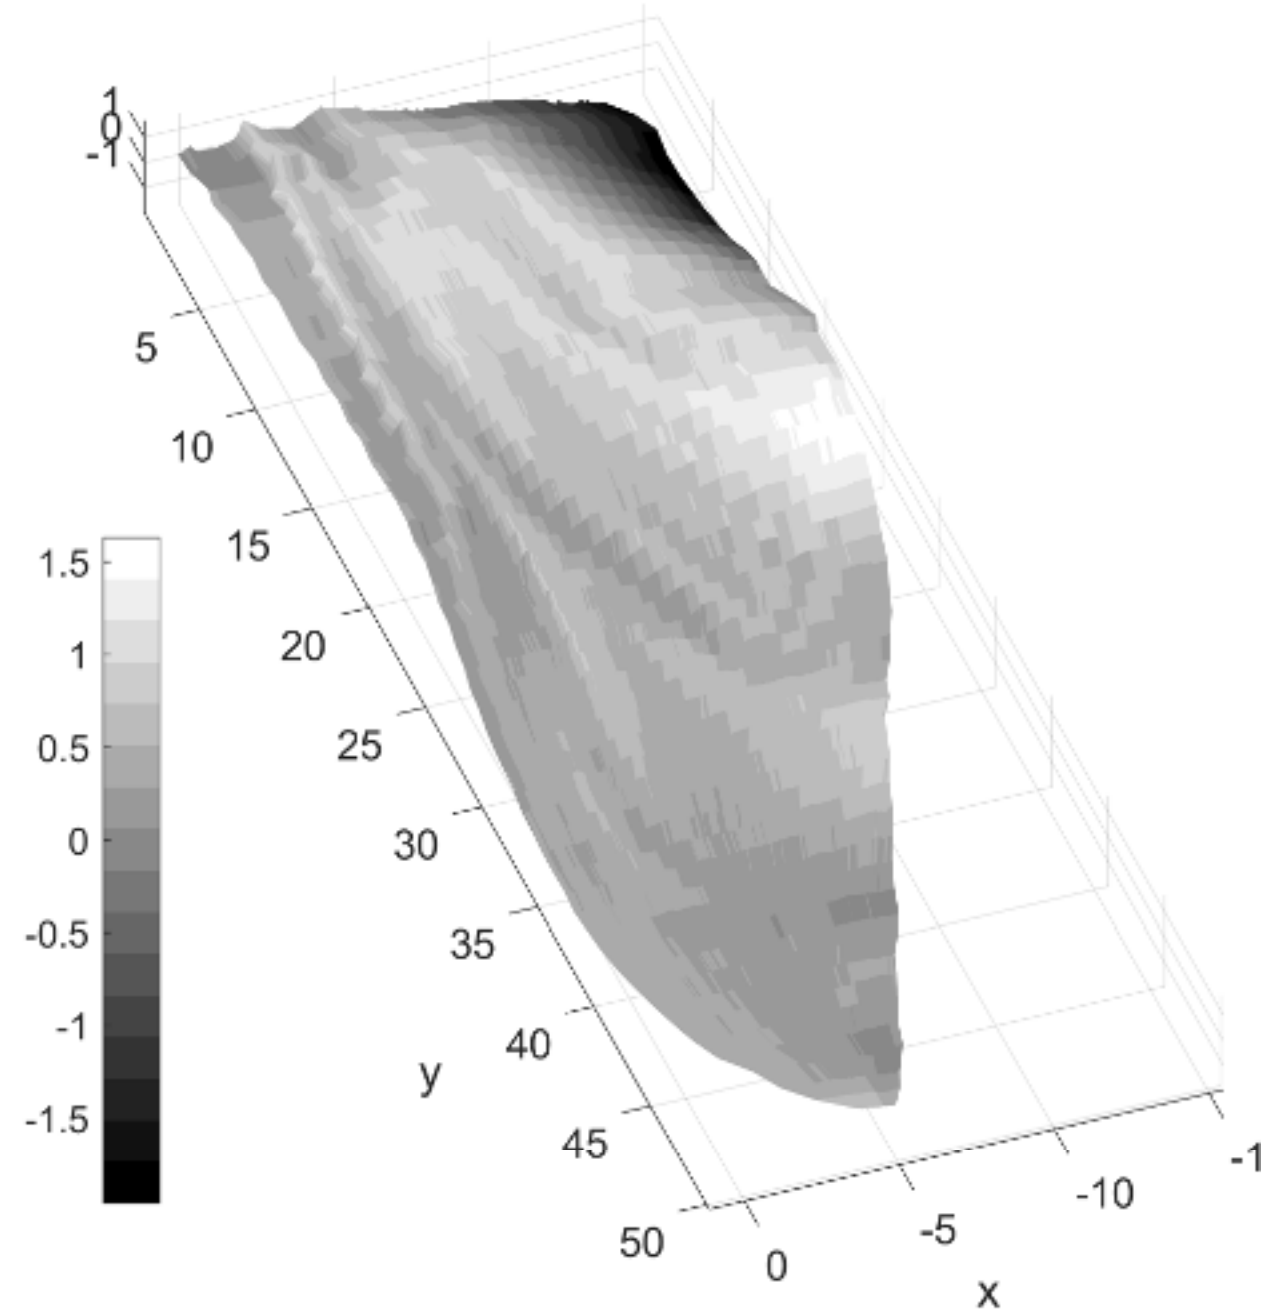

# Uropetala carovei-M1-museum

## Forewing

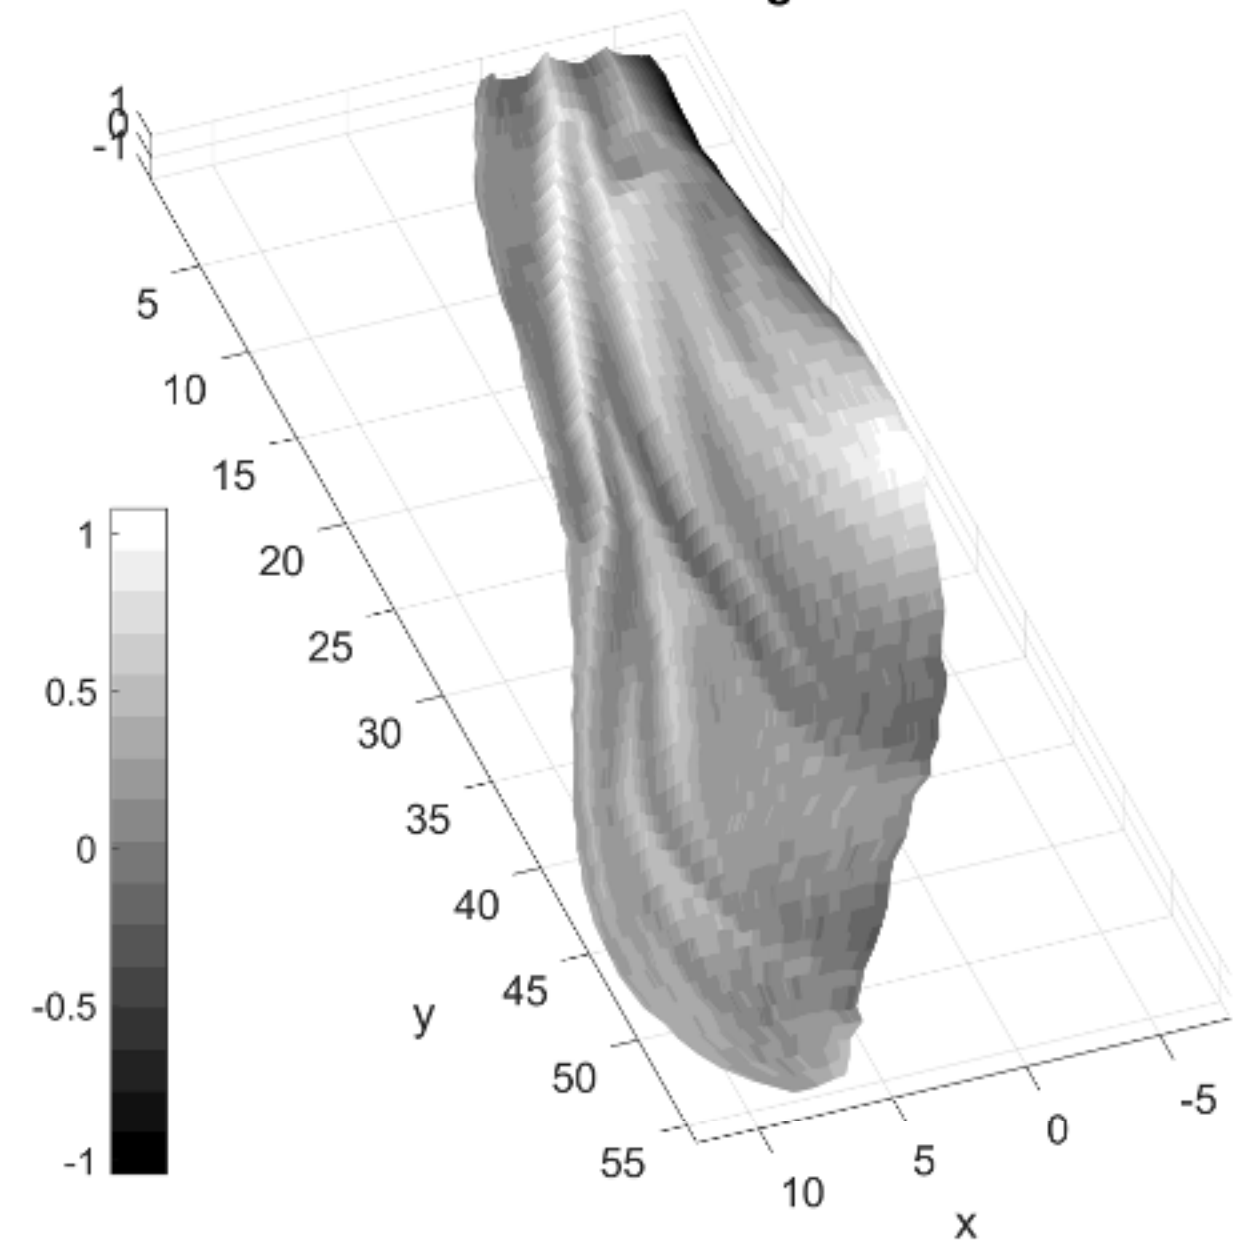

## Hind wing

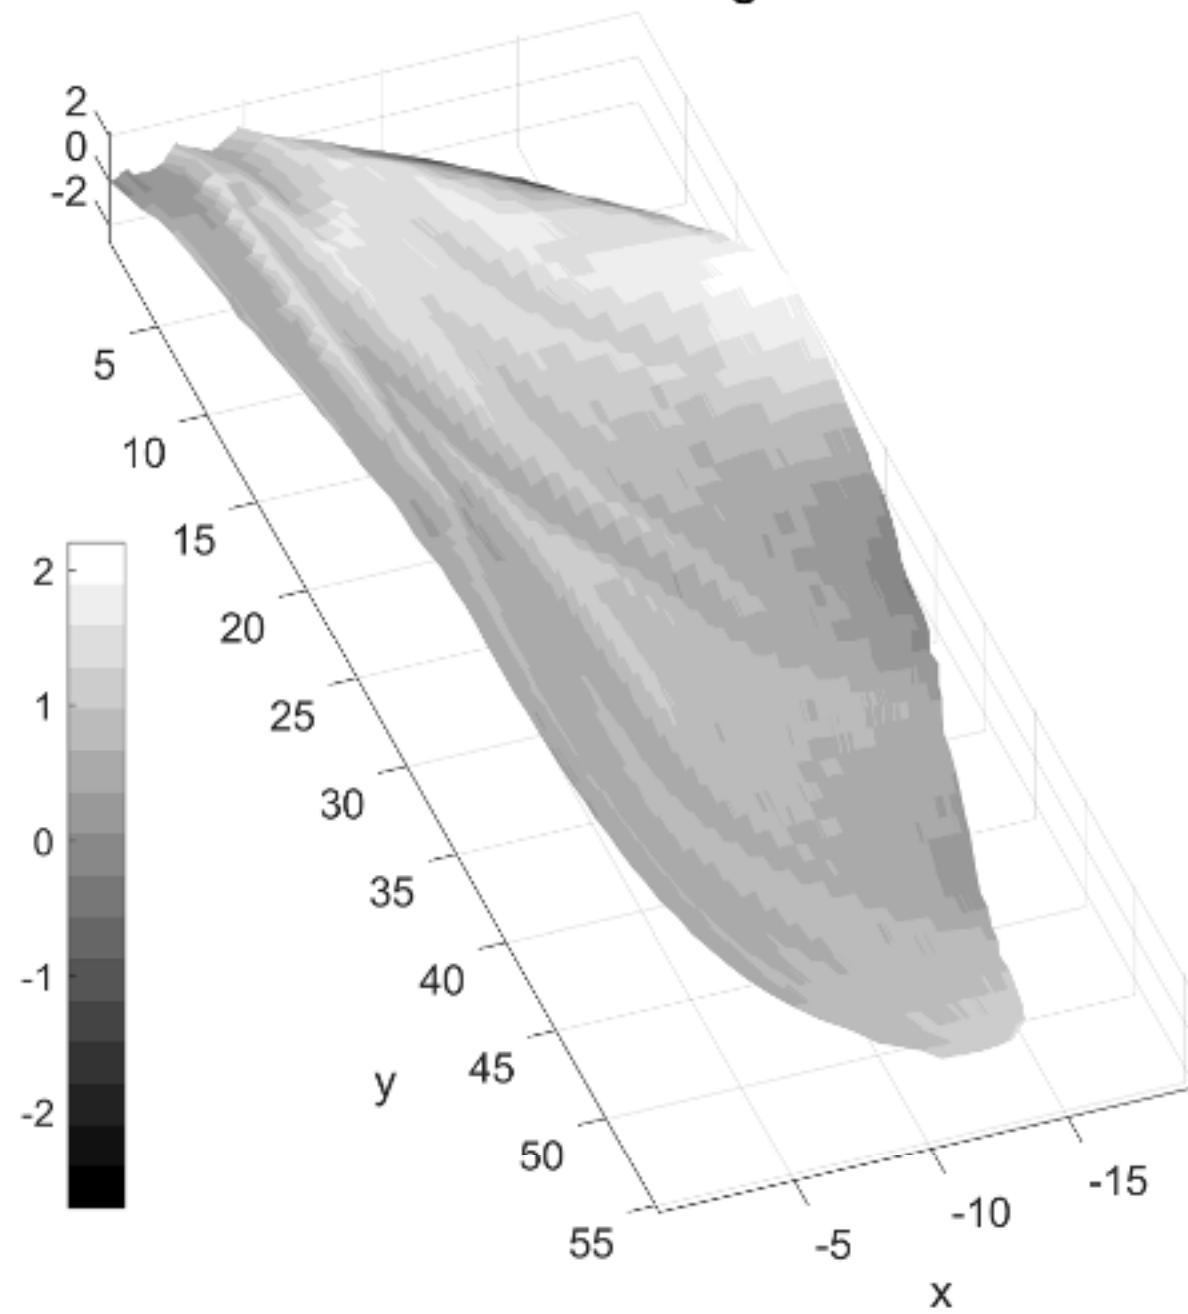

# Aeshna grandis-M1-museum

## Forewing

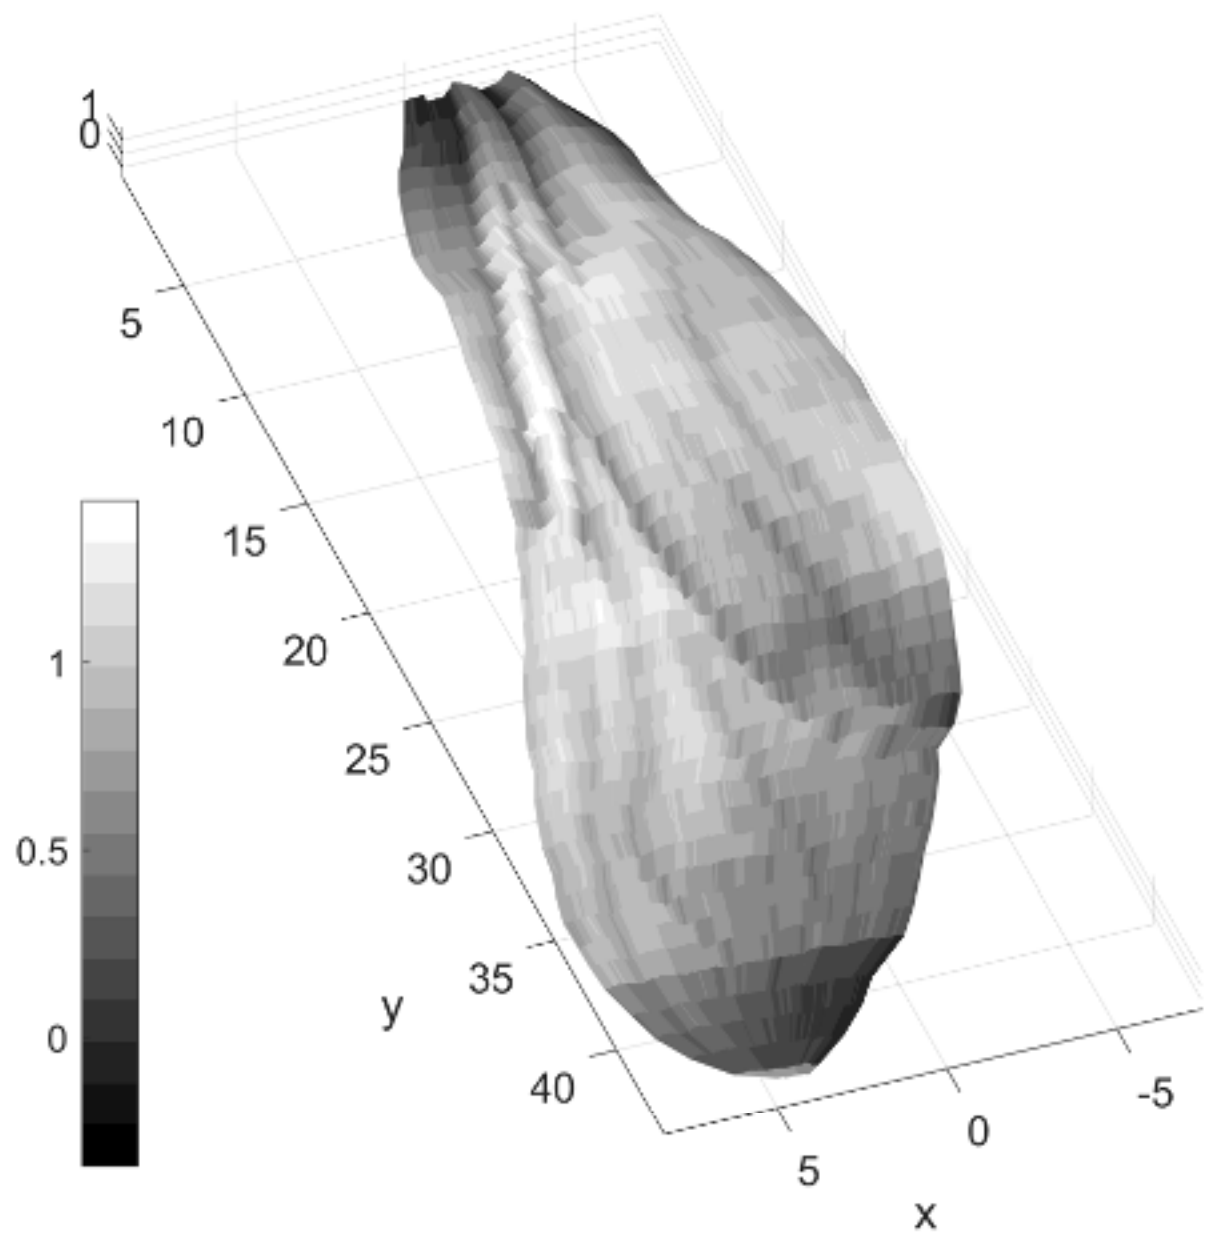

## Hind wing

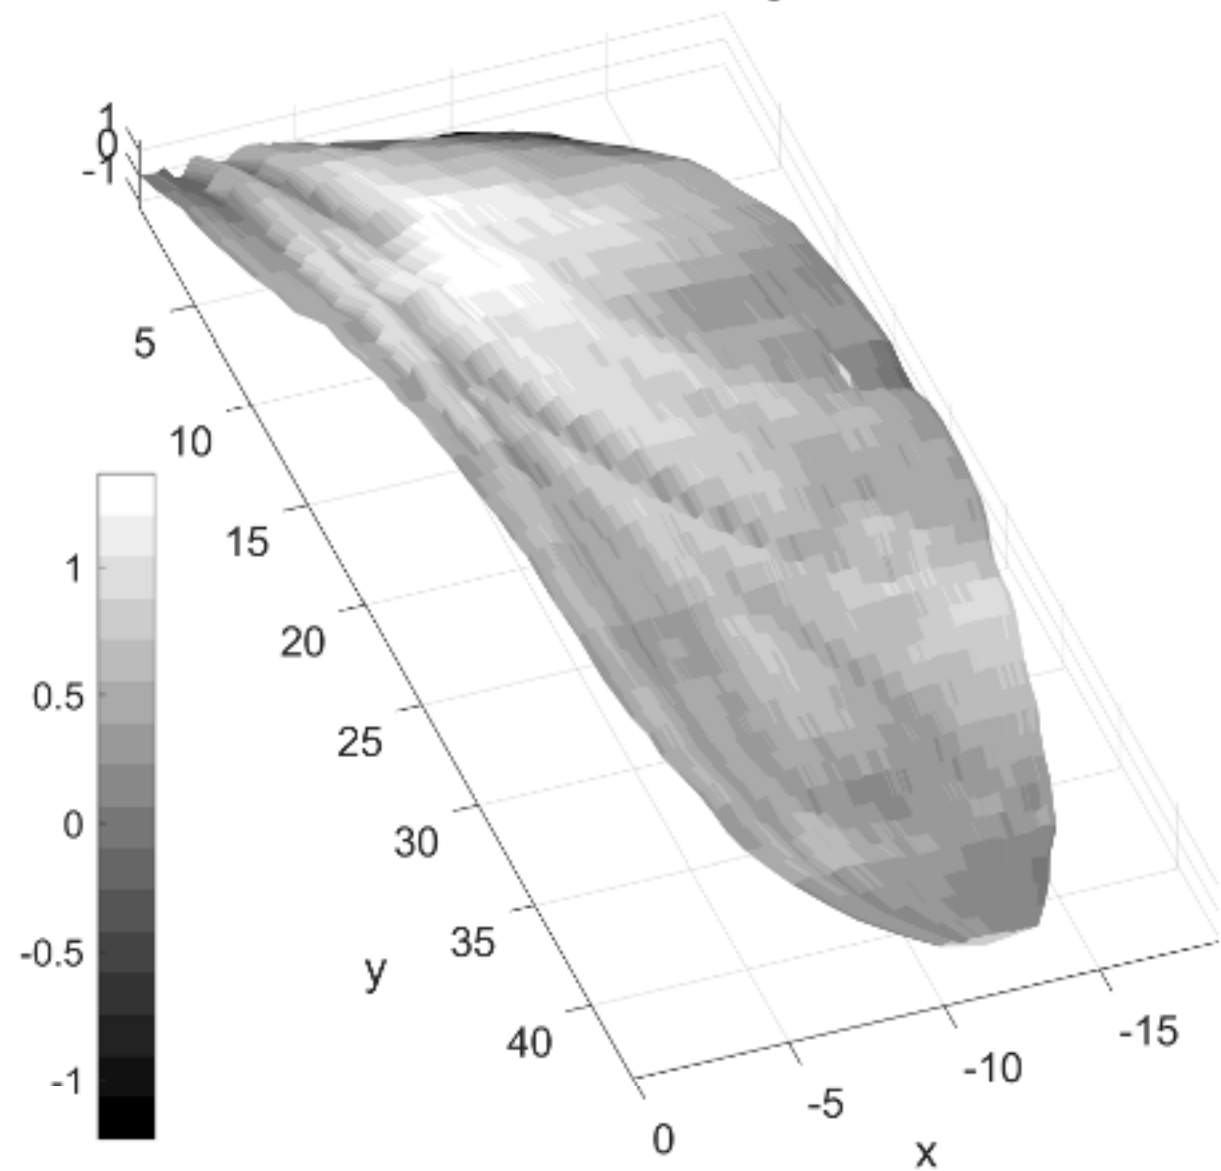

# Aeshna grandis-M2-museum

## Forewing

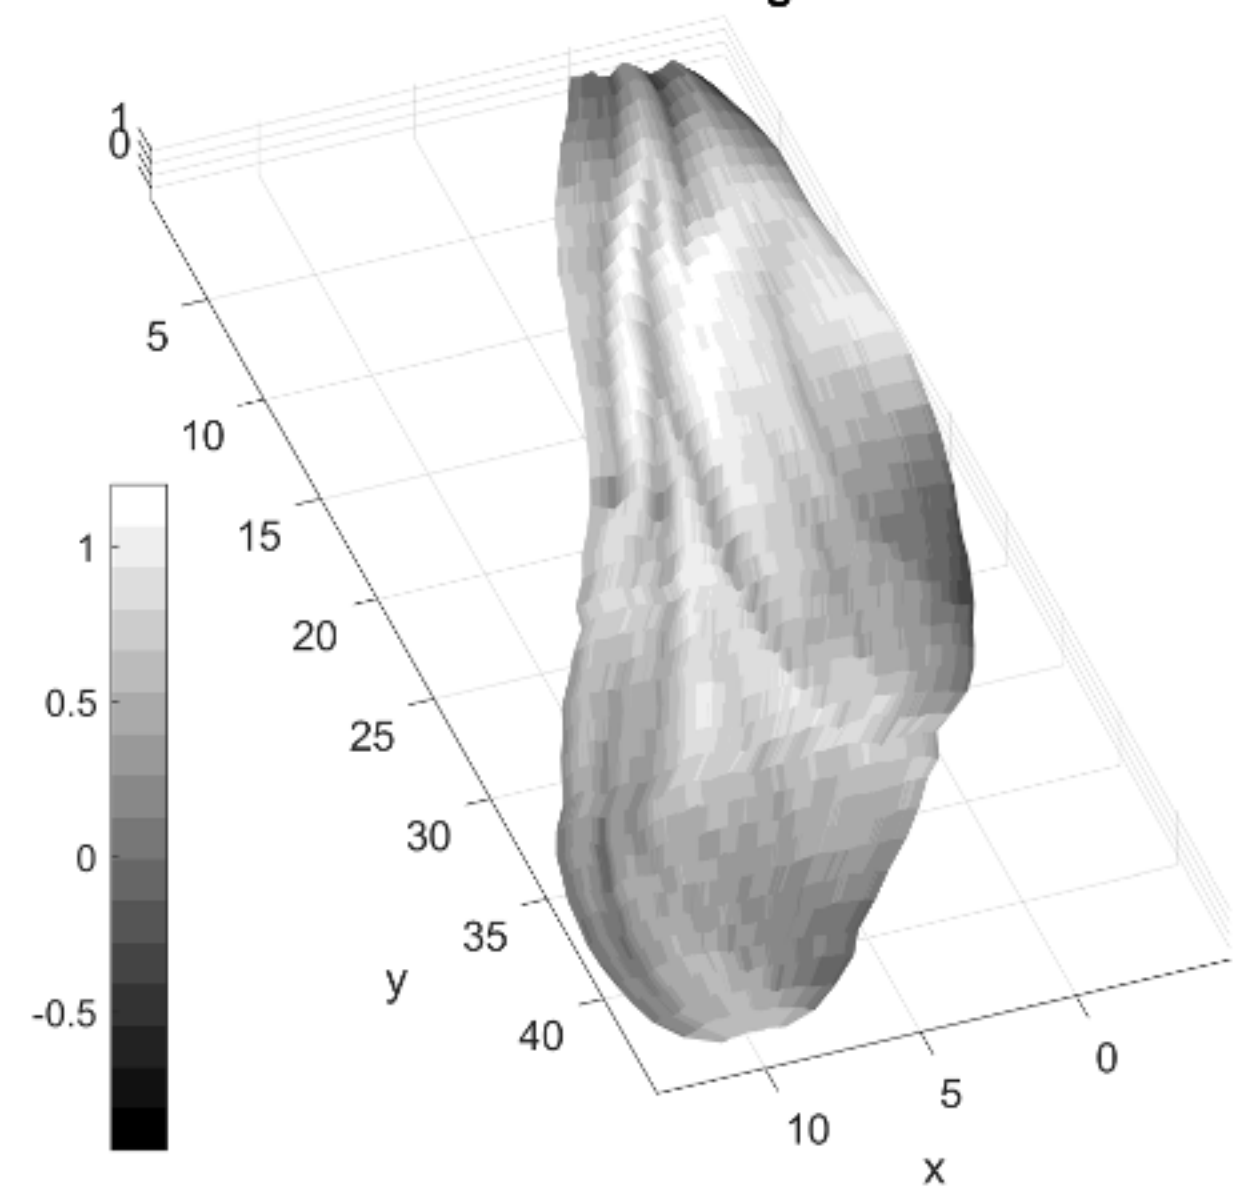

## Hind wing

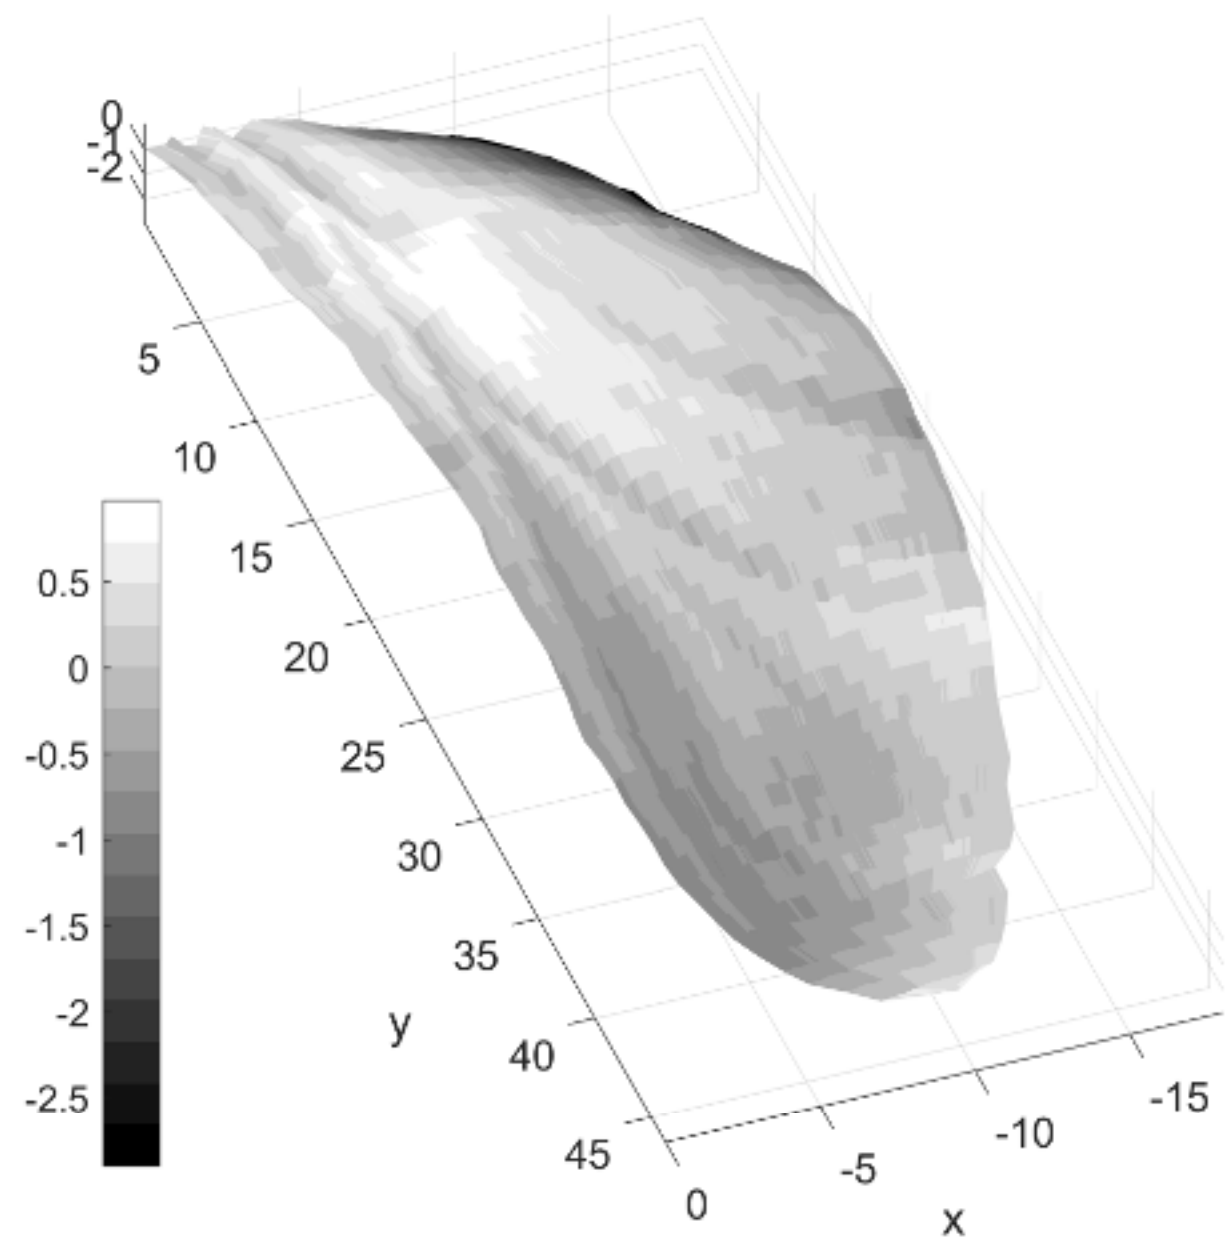



# Aeshna grandis-M3-museum

## Forewing

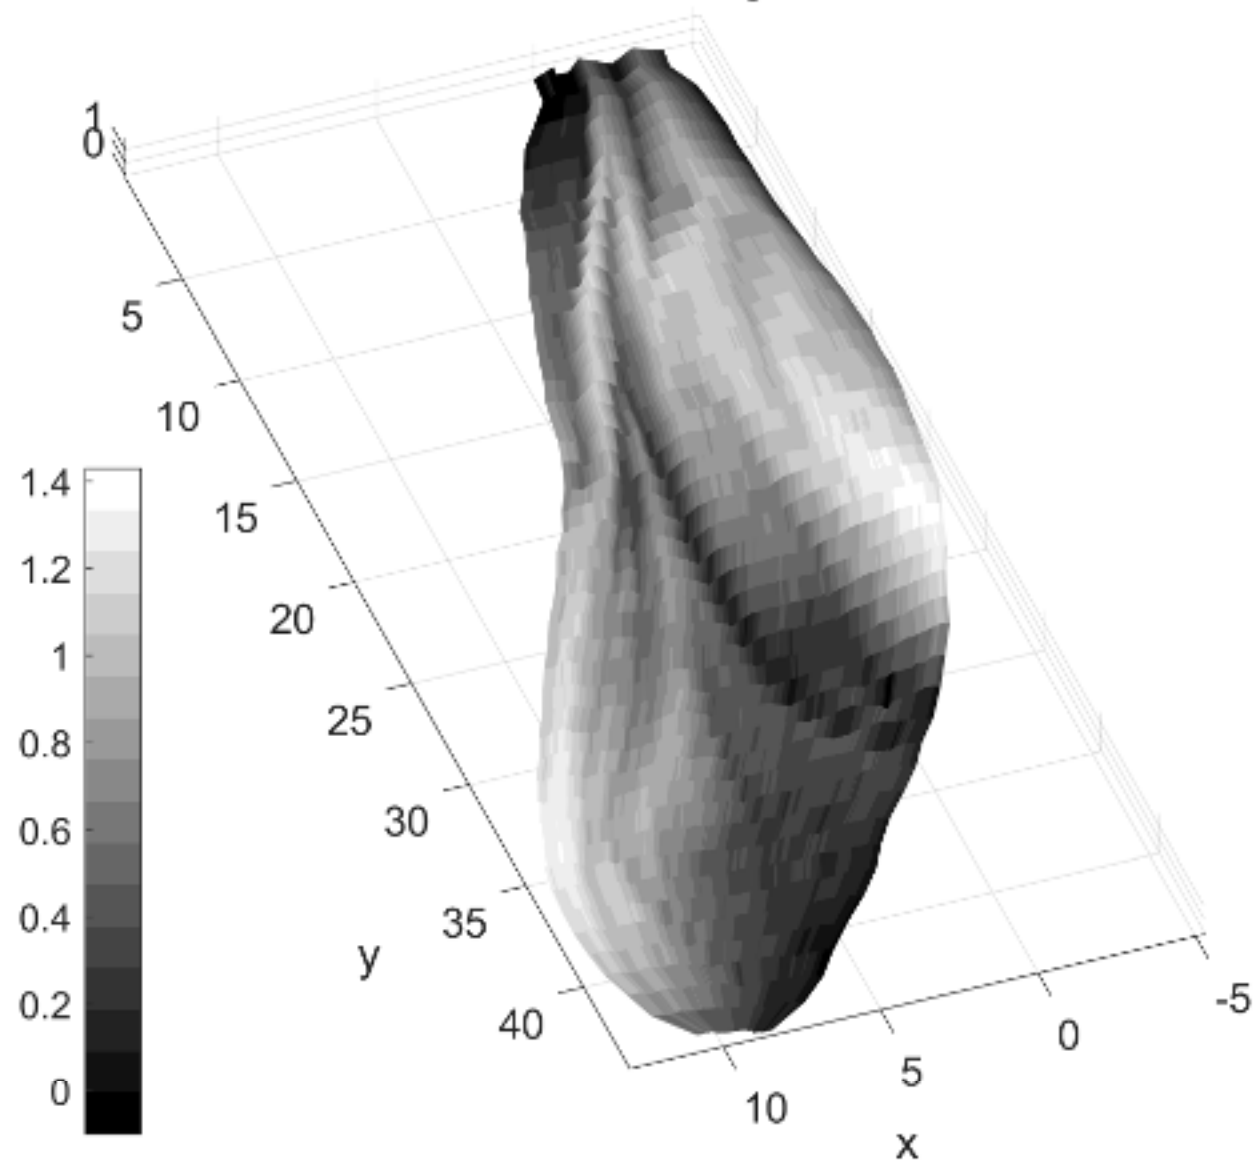

## Hind wing

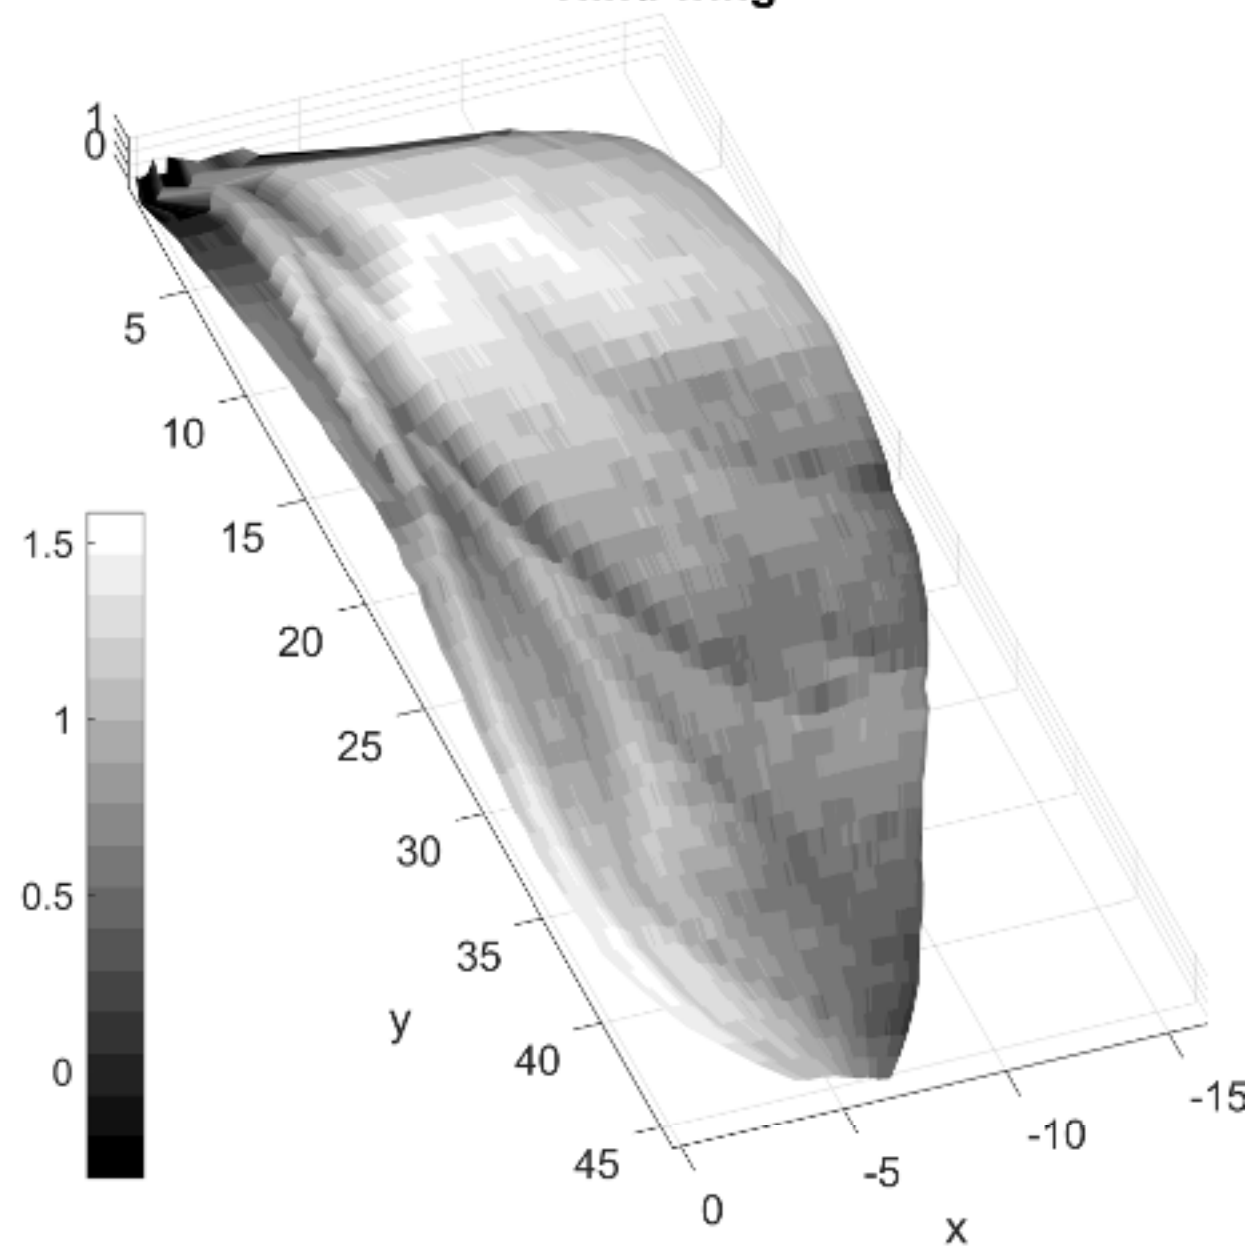

# Aeshna grandis-M4-fresh

## Forewing

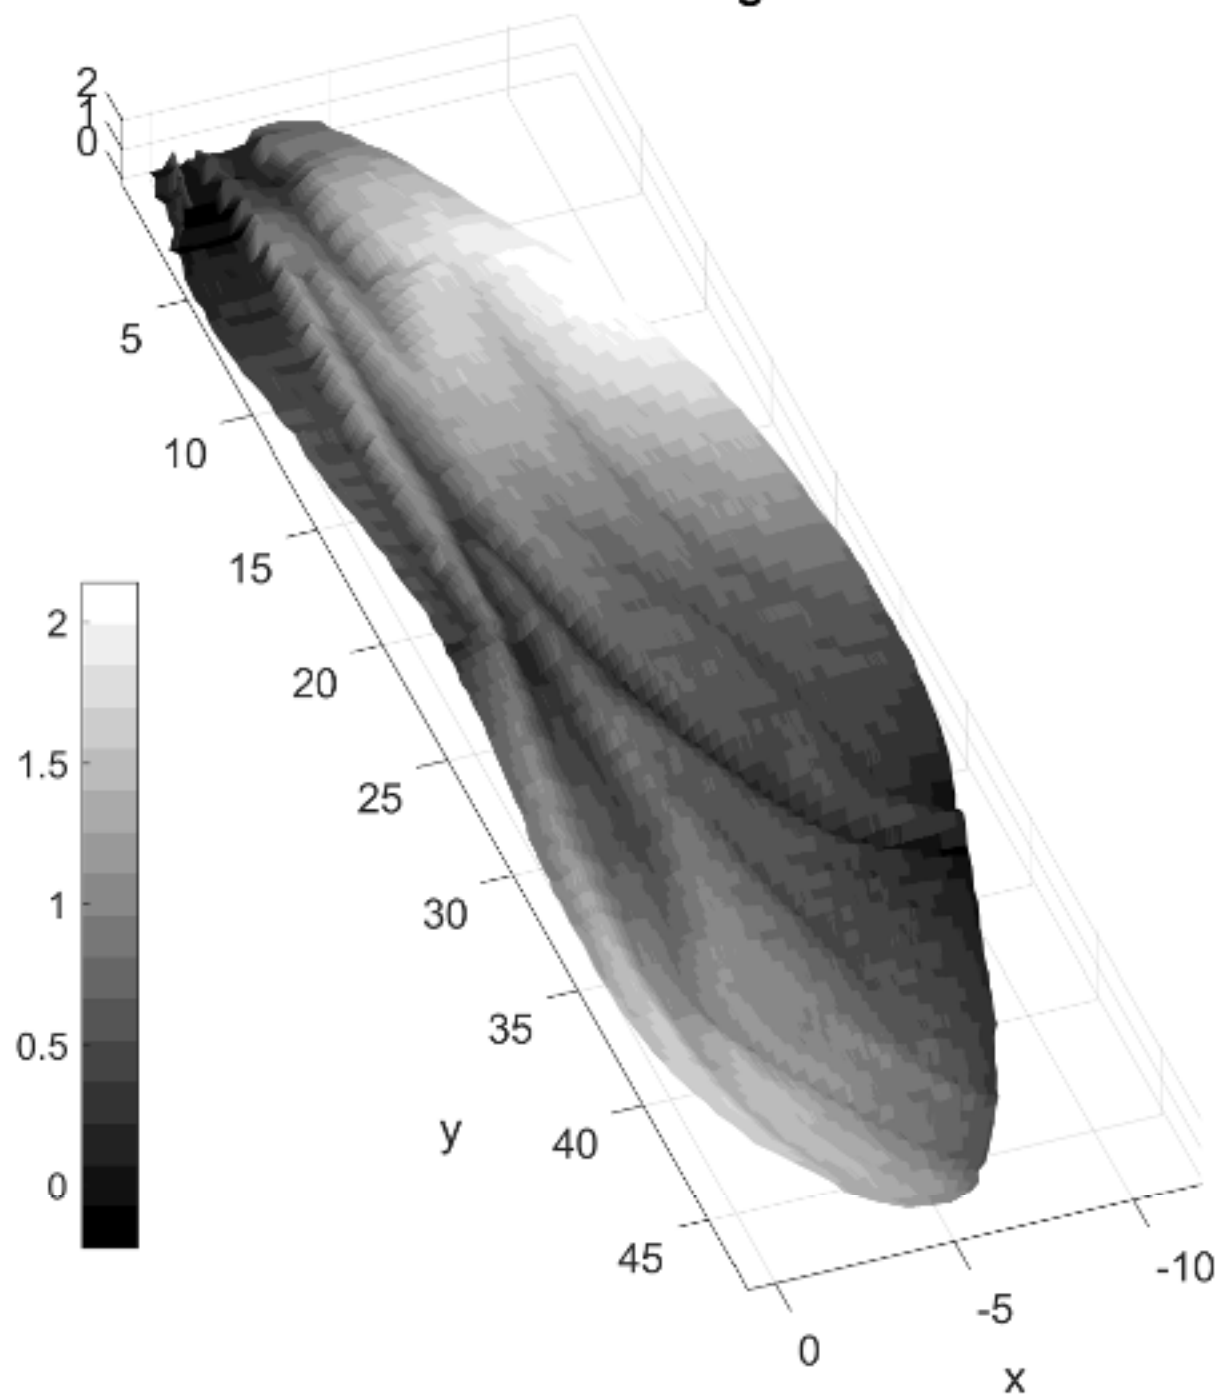

## Hind wing

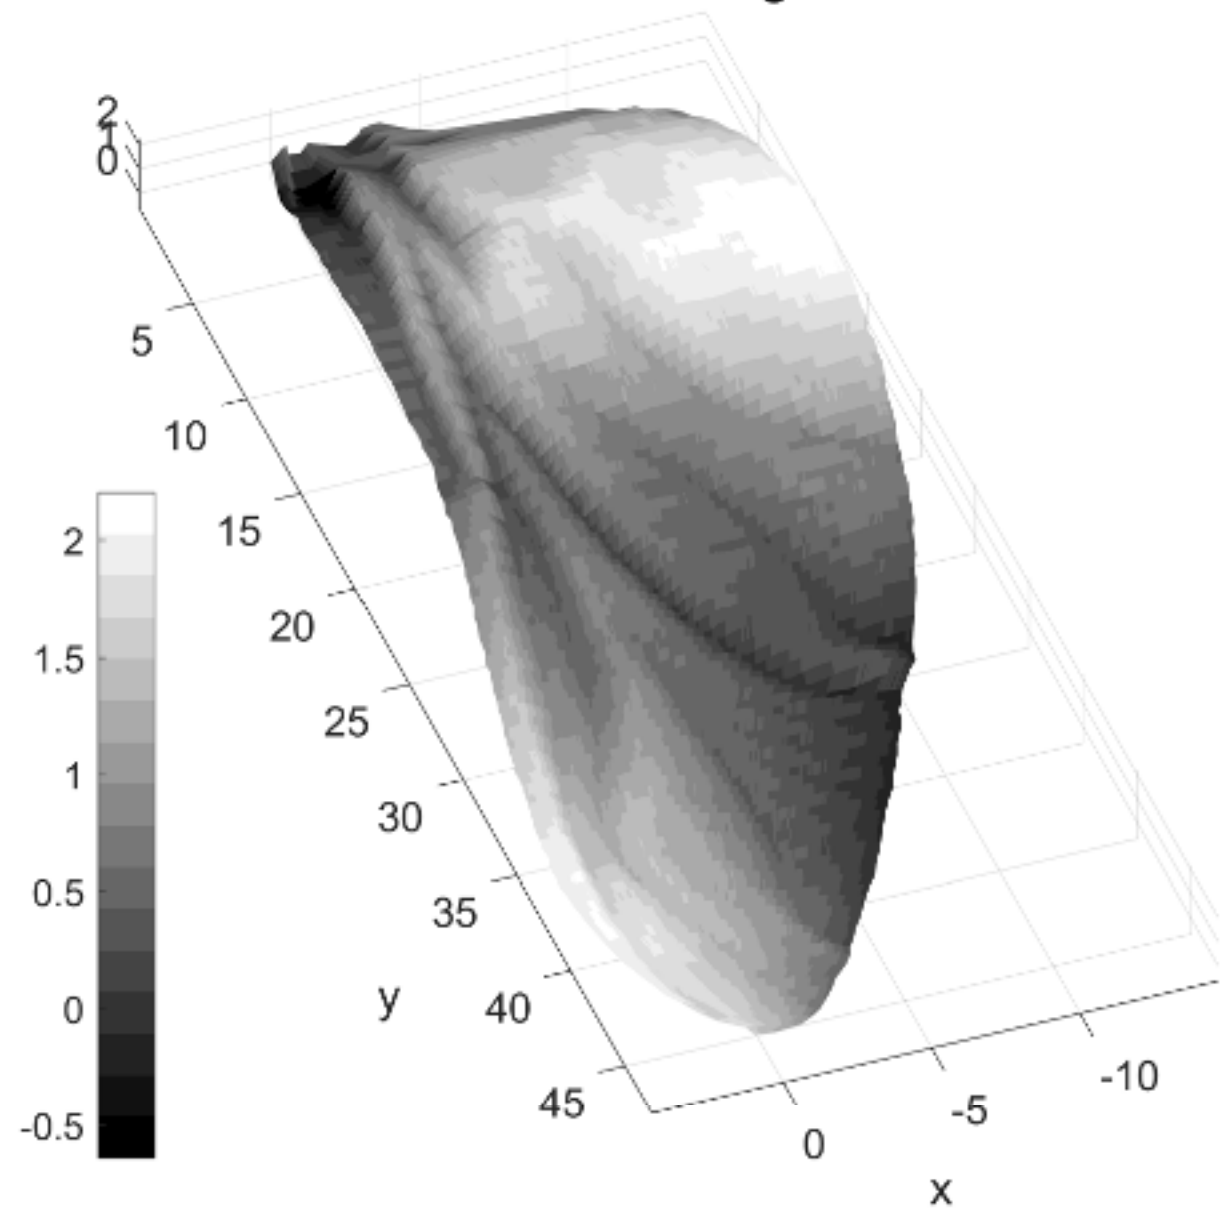

# Aeshna grandis-M5-fresh

## Forewing

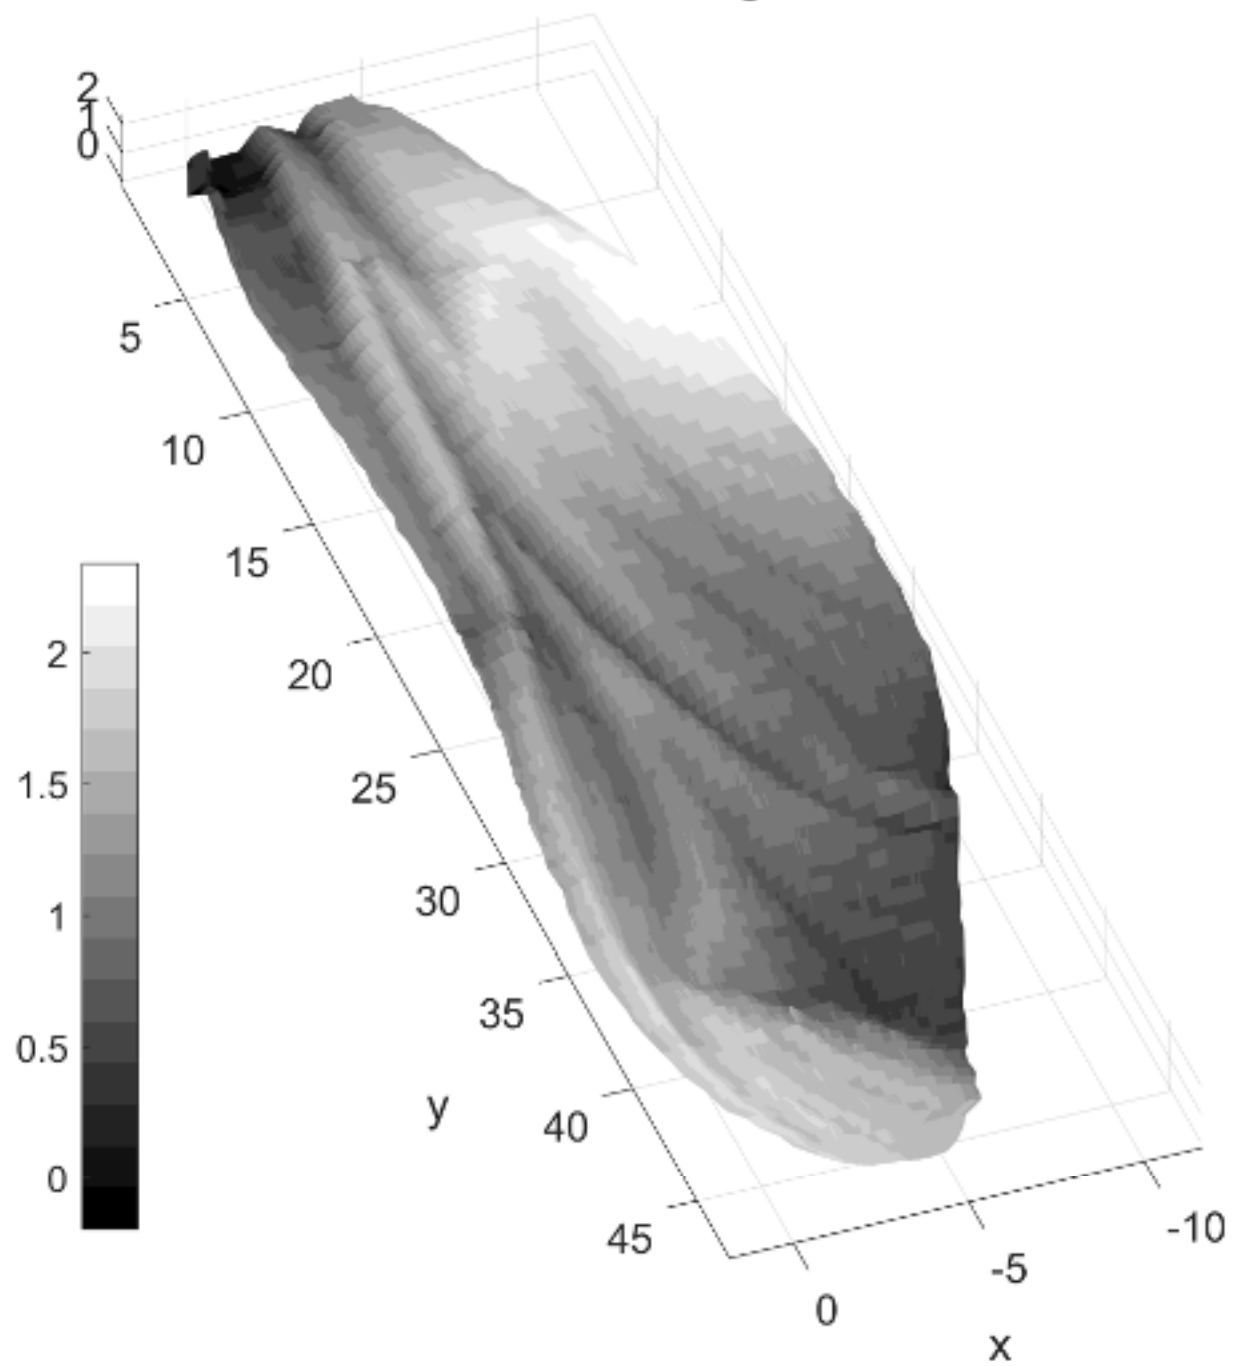

## Hind wing

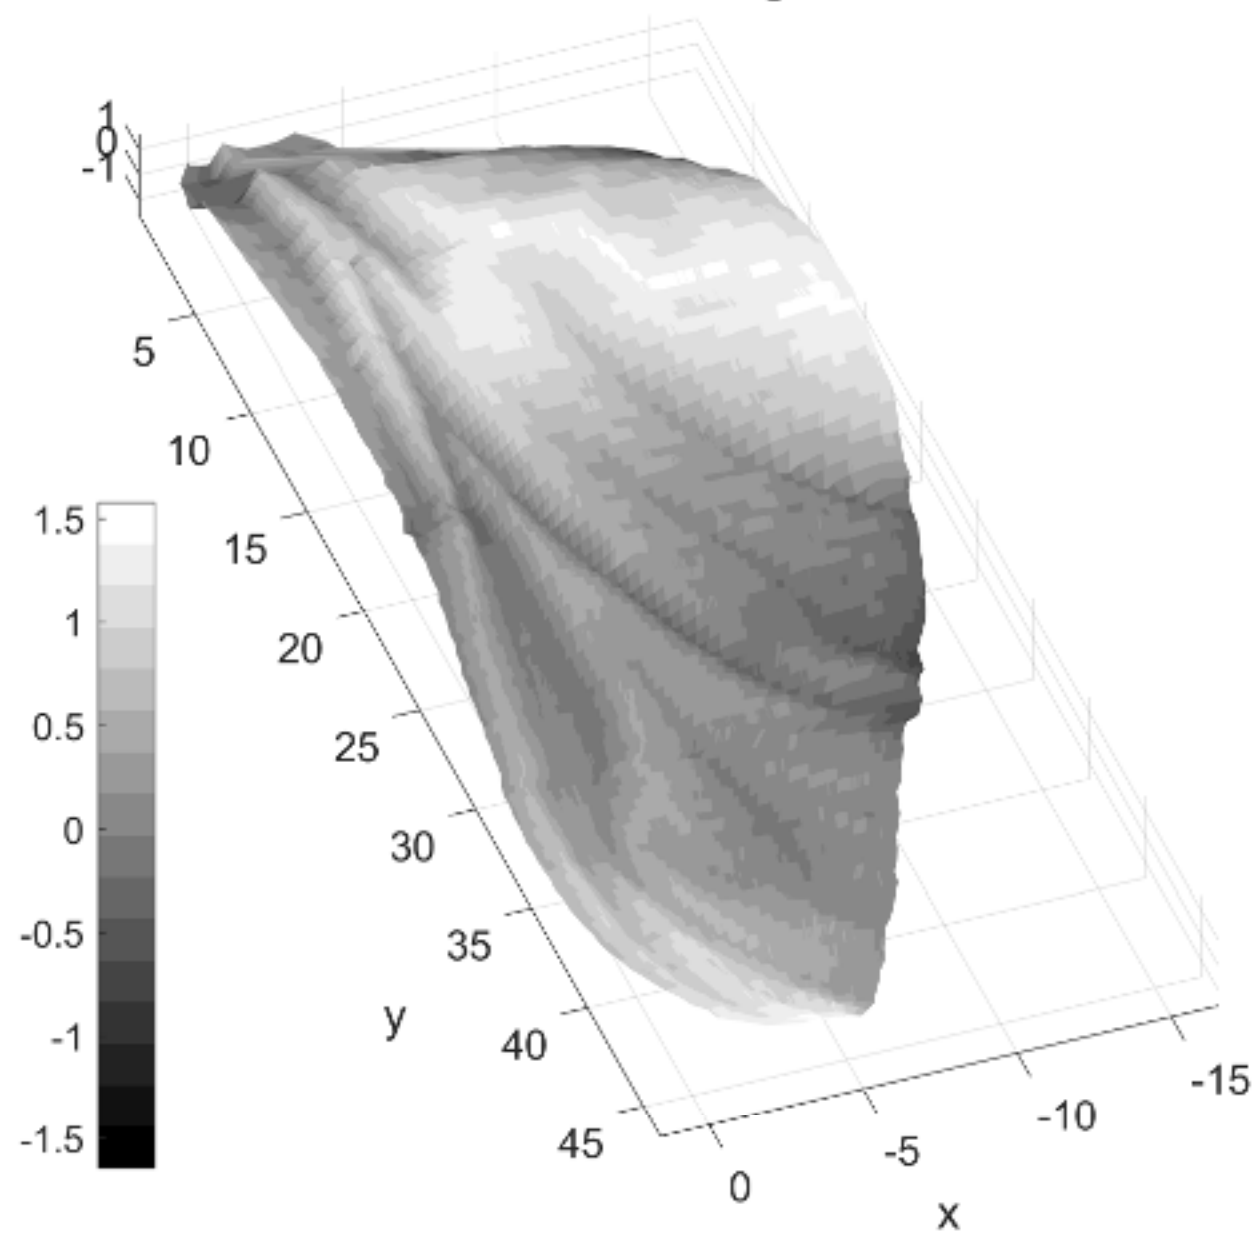

# Aeshna grandis-M6-fresh

## Forewing

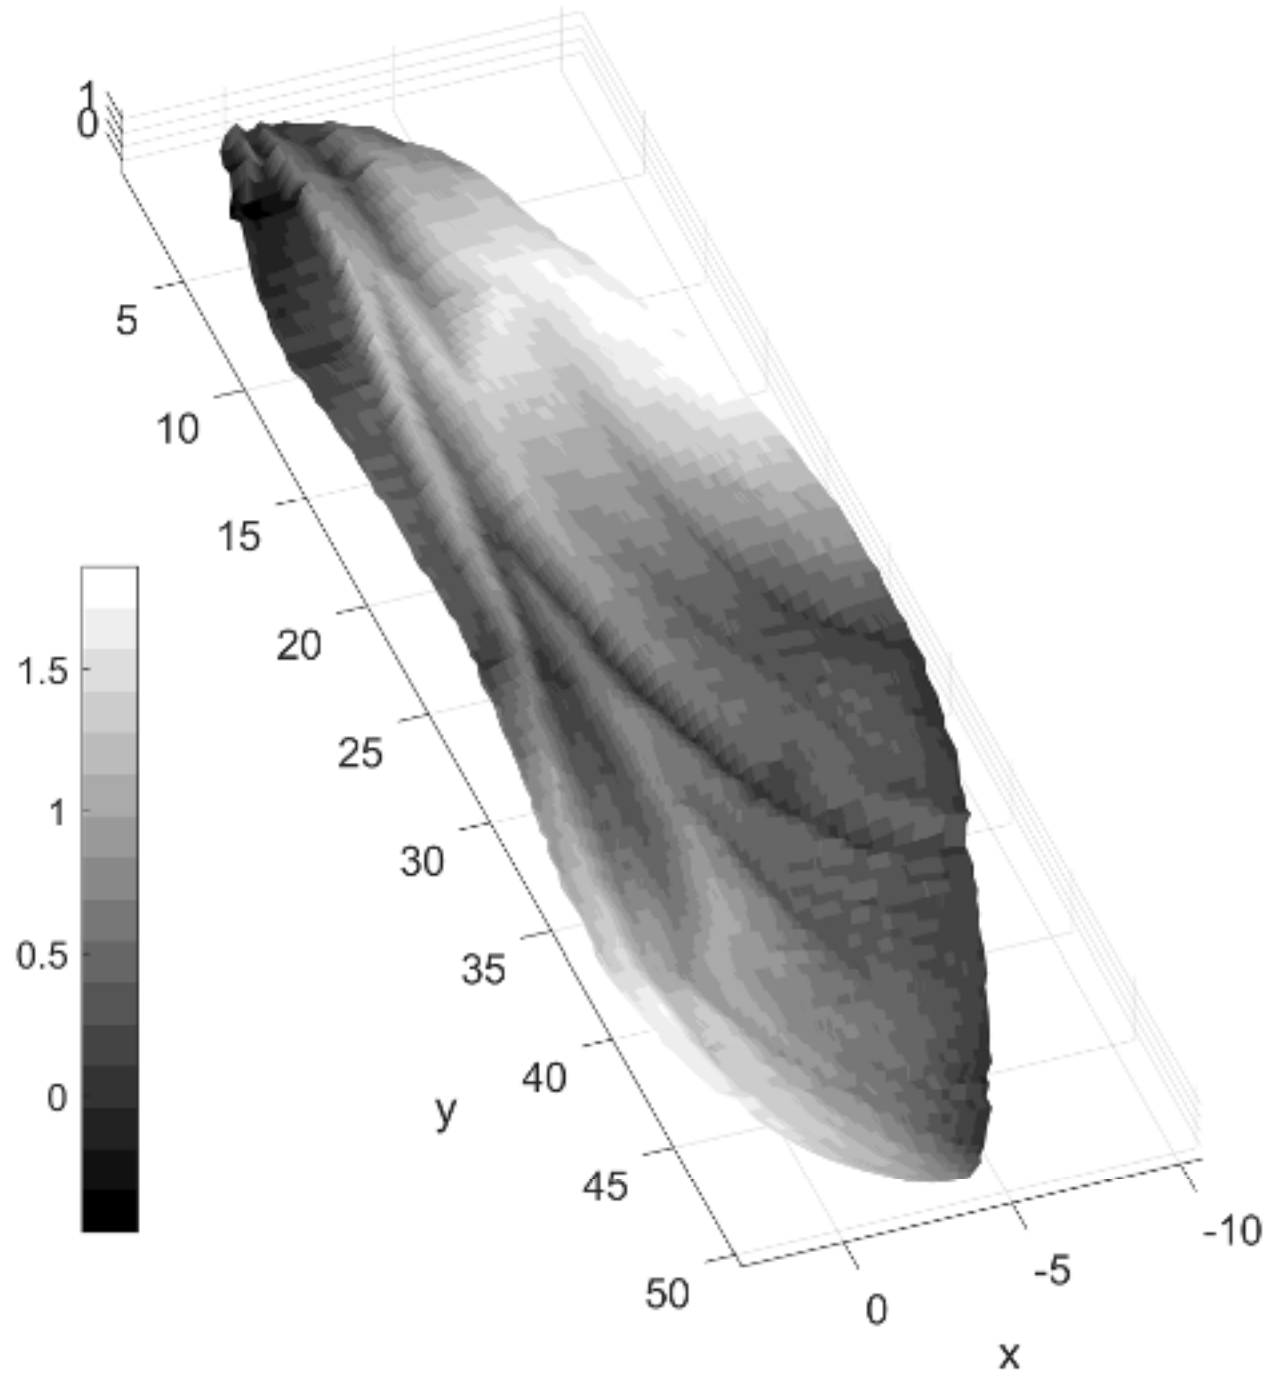

## Hind wing

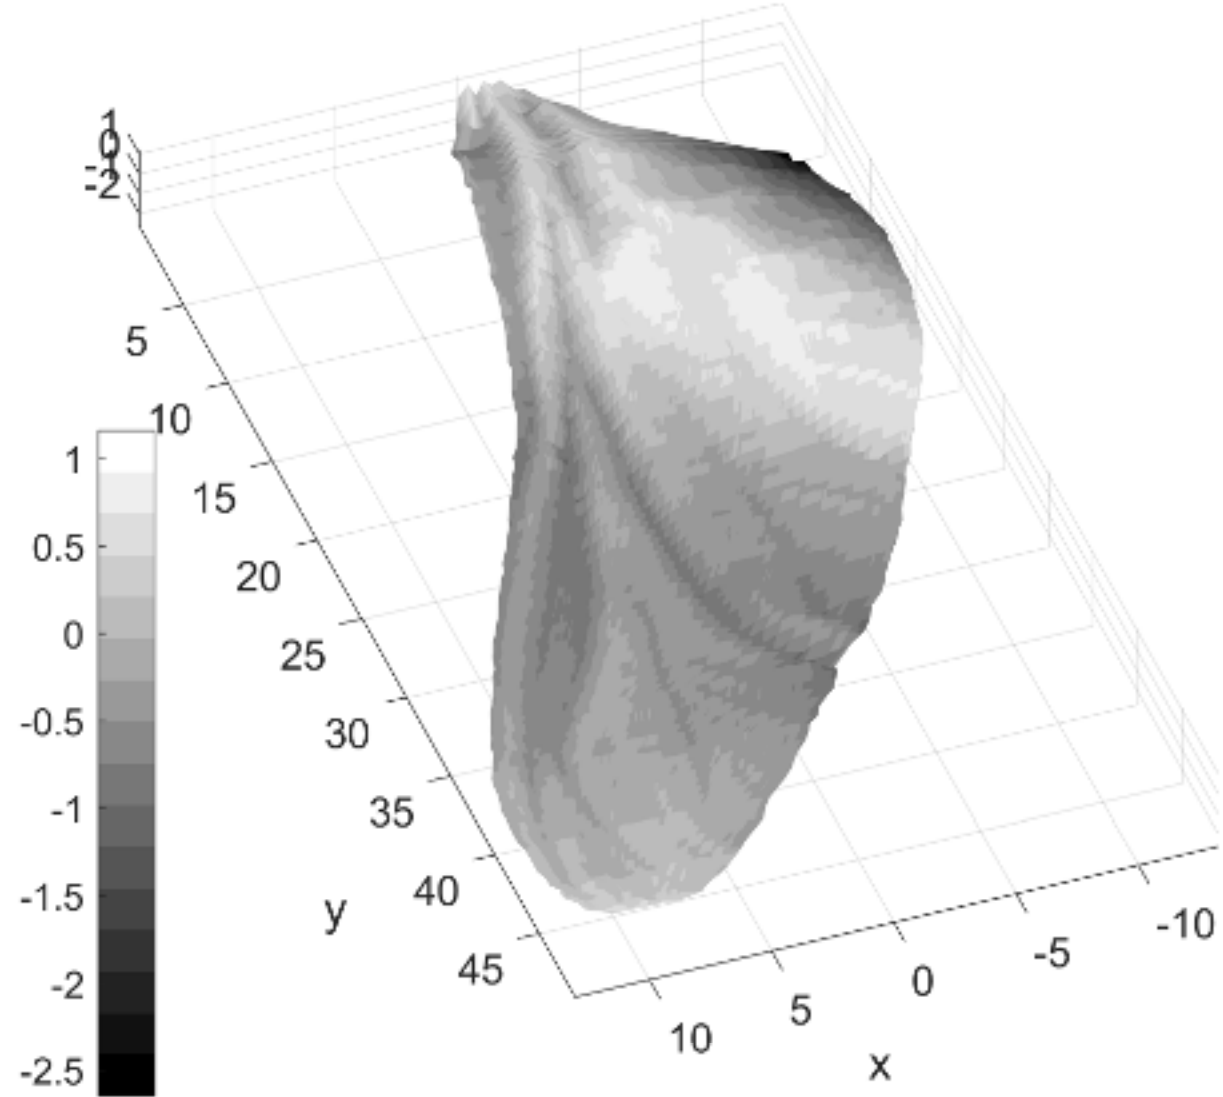

Supplement: rstb20150389supp1.pdf [file rstb20150389supp1.pdf]
